# Supplementary material for: Lipid Peroxidation and Type I Interferon Coupling Fuels Pathogenic Macrophage Activation Causing Tuberculosis Susceptibility
Source: eLife journal article supplement (doi:10.7554/elife.106814), 2025-08-29

Figure 3C: Fth

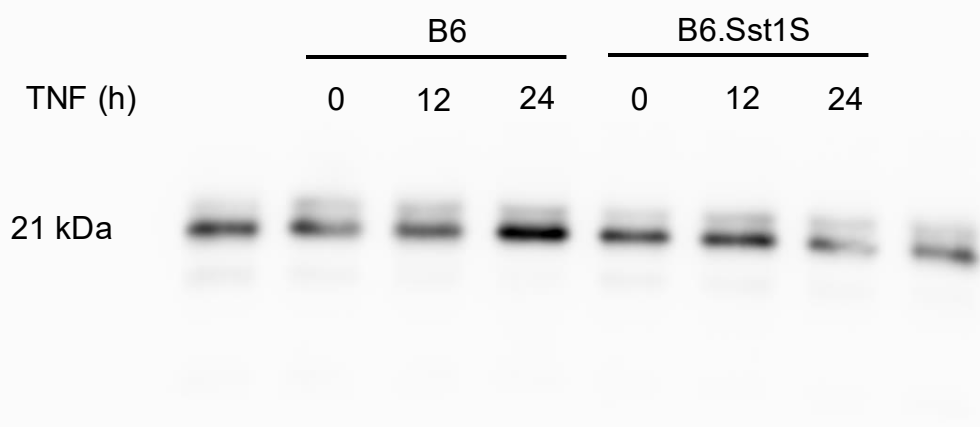

Figure 3C:  $\beta$ -actin

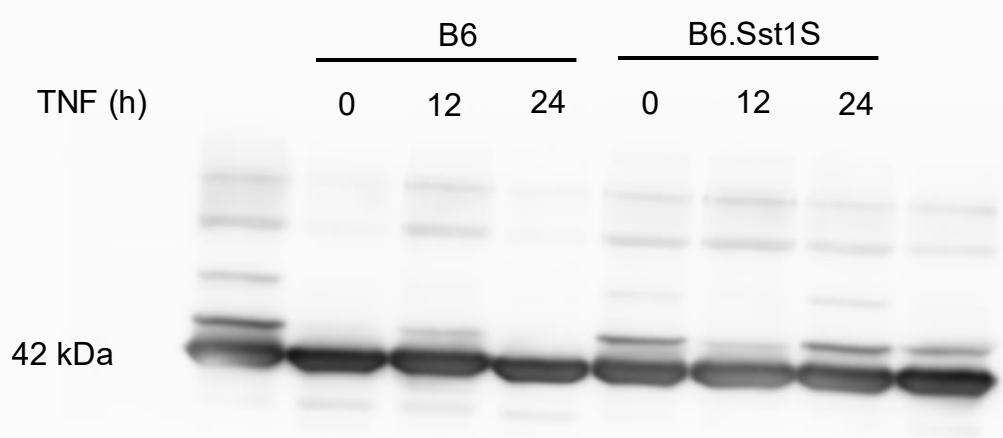

Figure 3C: Ftl

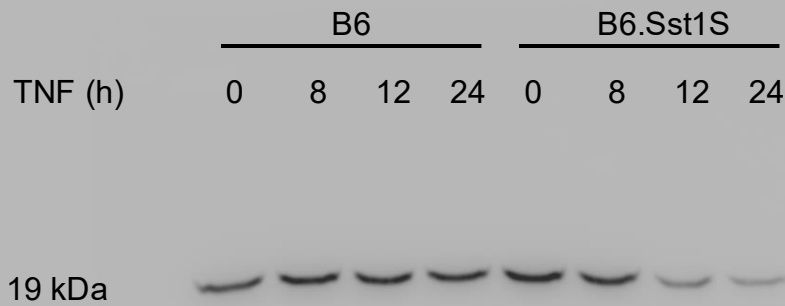

Figure 3C:  $\beta$ -tubulin

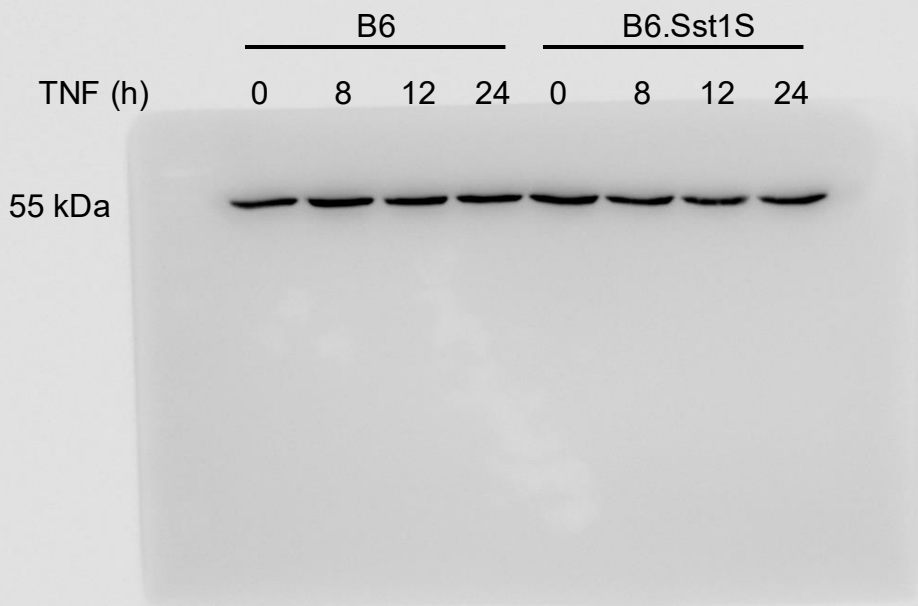

Figure 3D: Gpx1

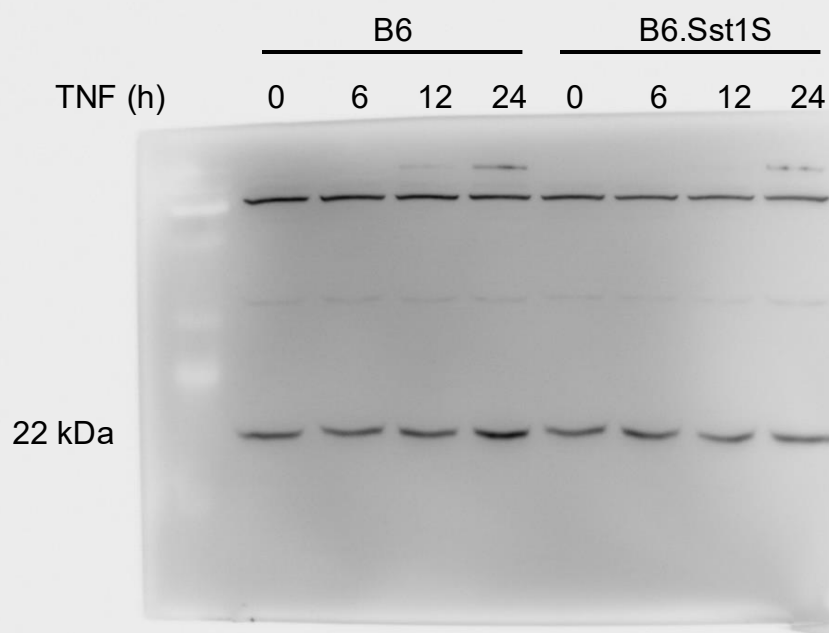

Figure 3D:  $\beta$ -tubulin

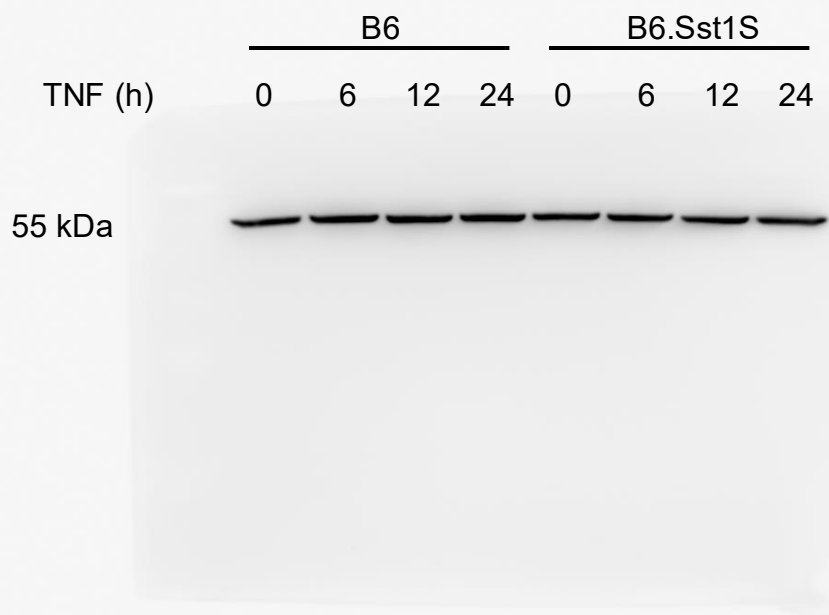

Figure 3D: Gpx4

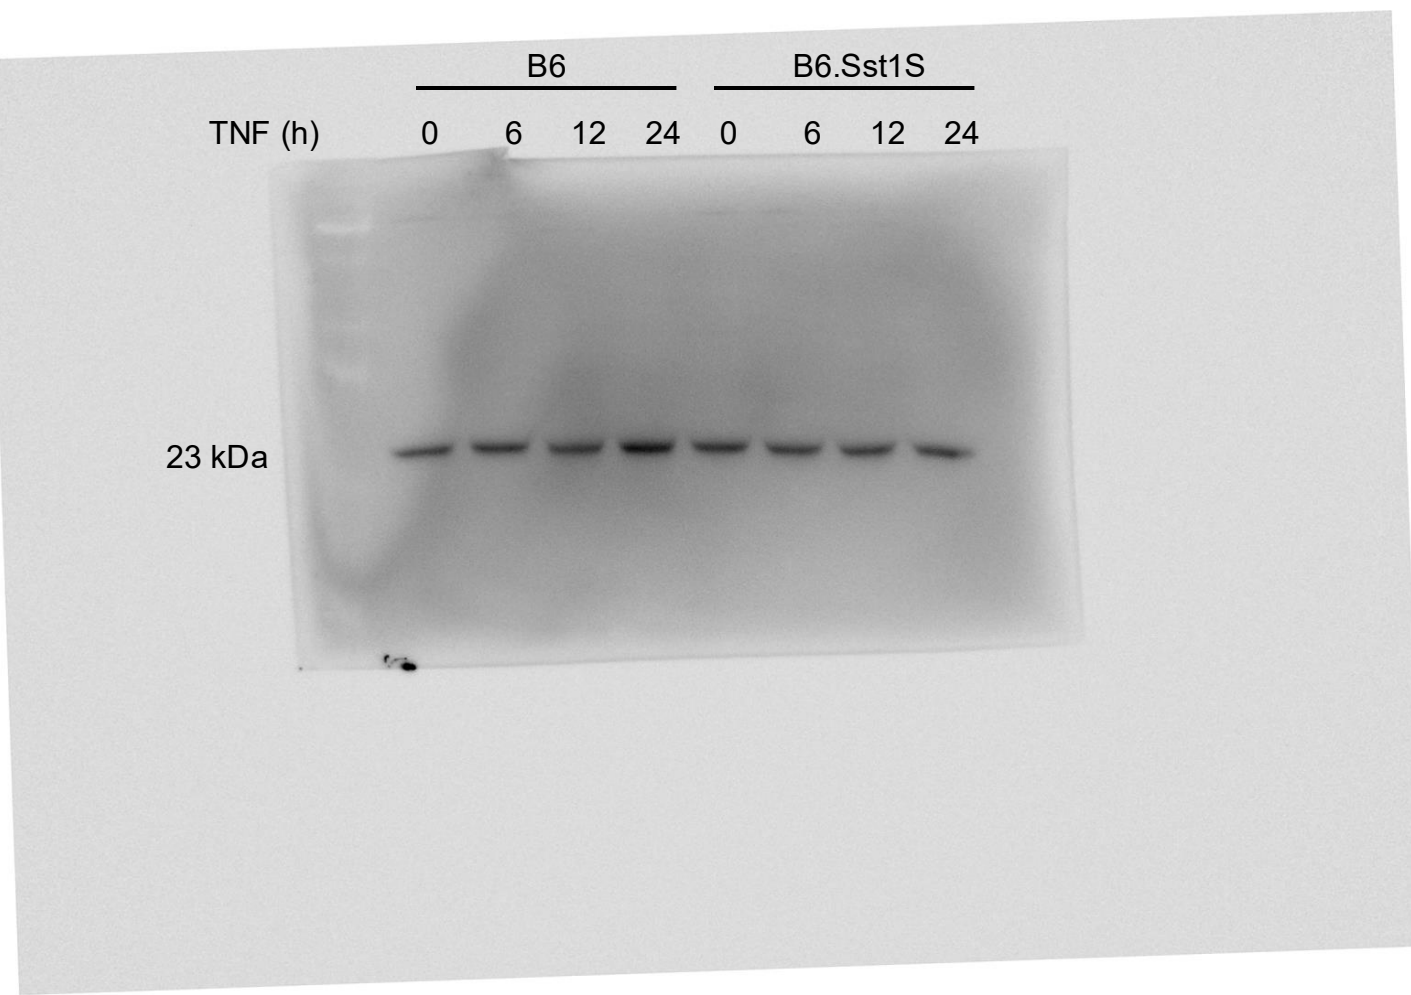

Figure 3D:  $\beta$ -tubulin

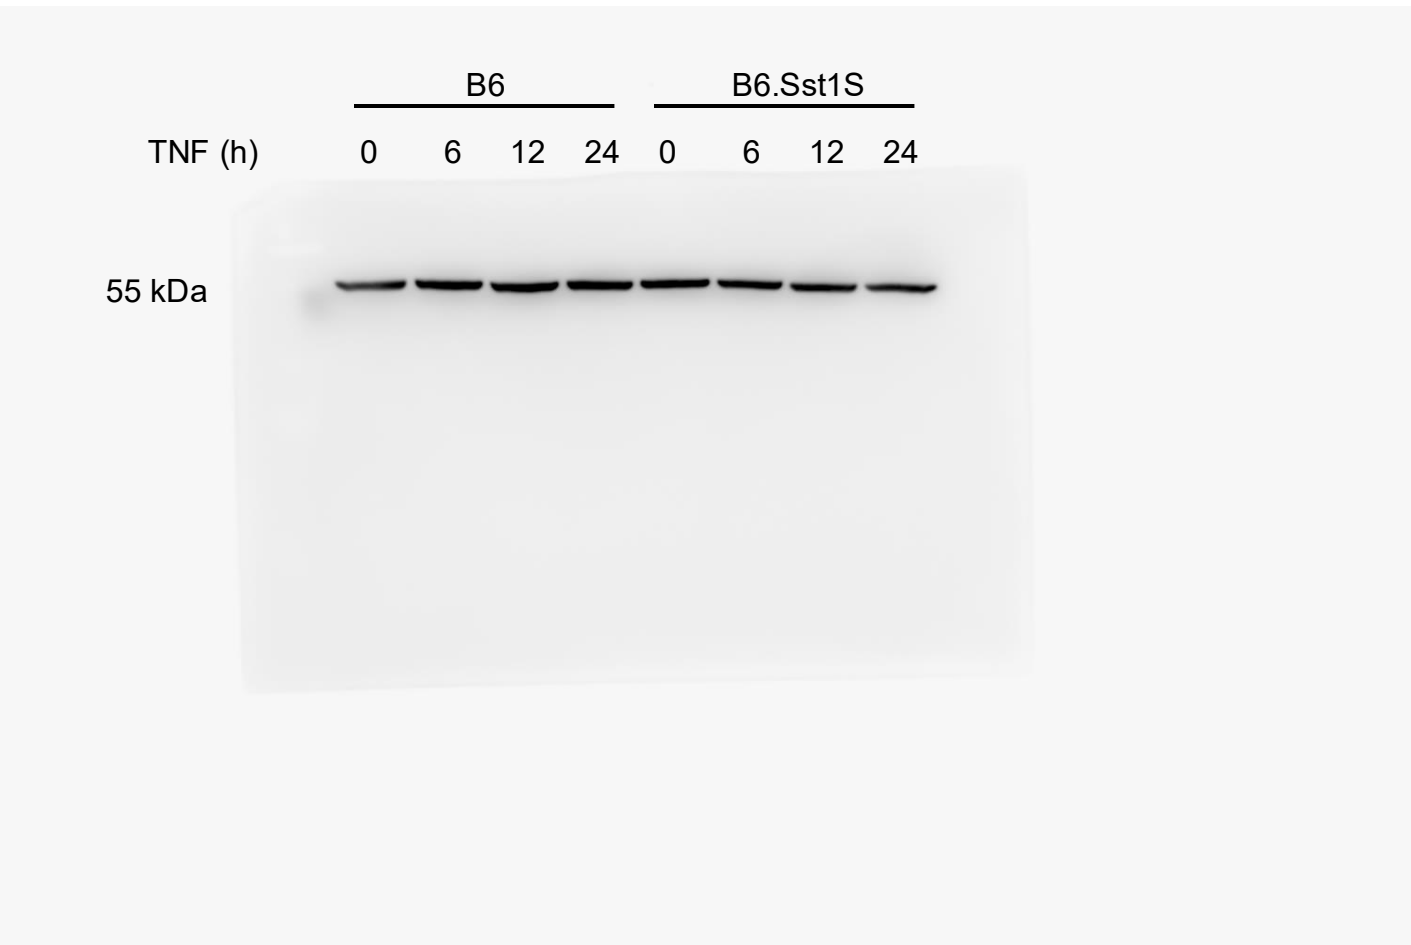

Figure 3K: p-cJun- 12 h

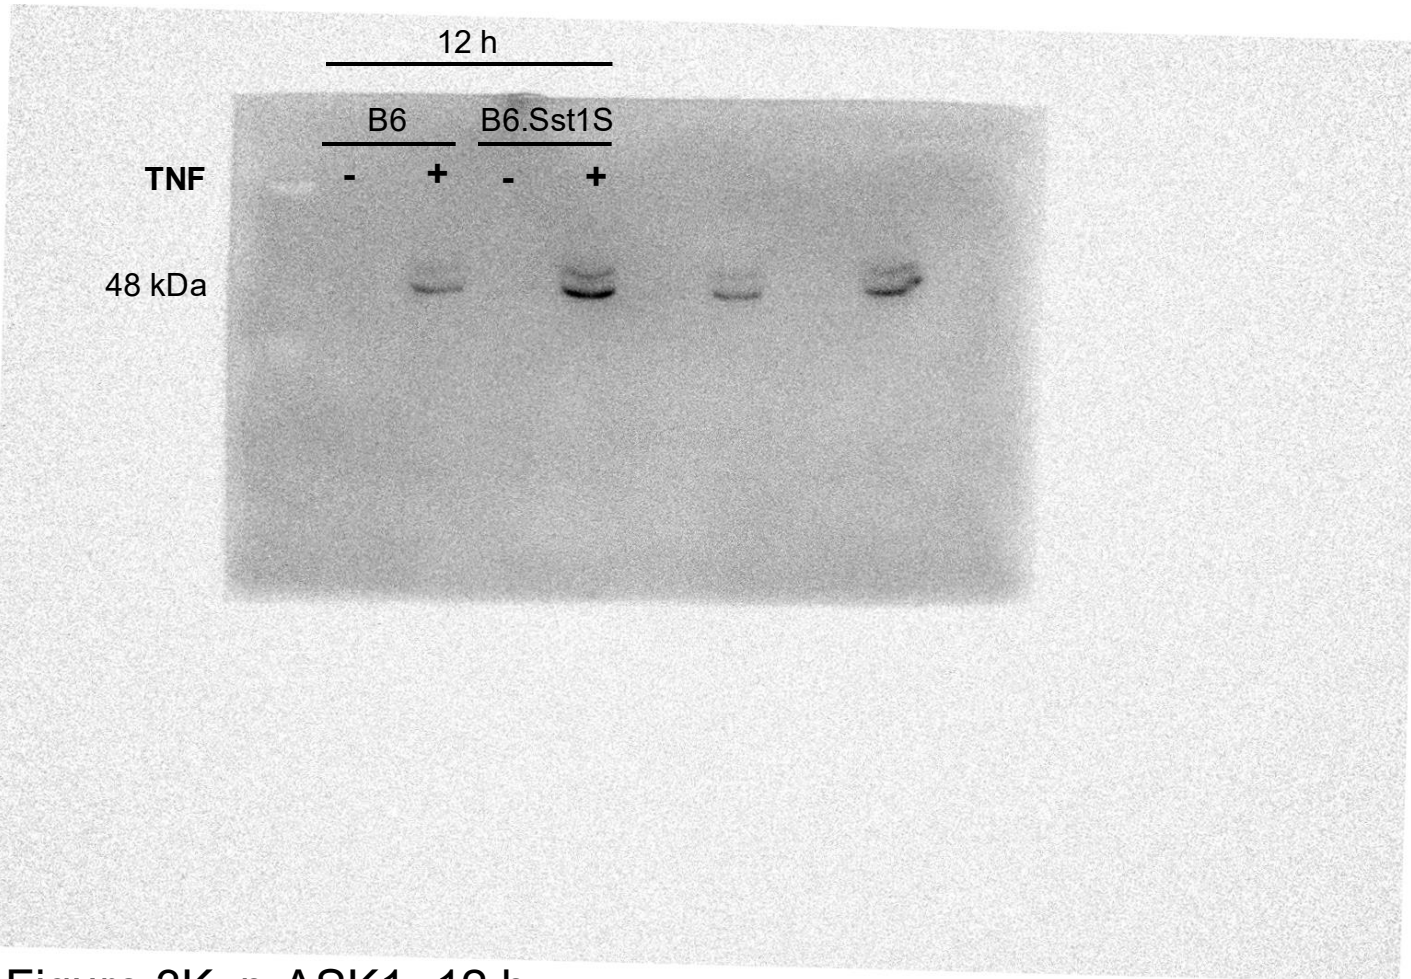

Figure 3K: p-ASK1- 12 h

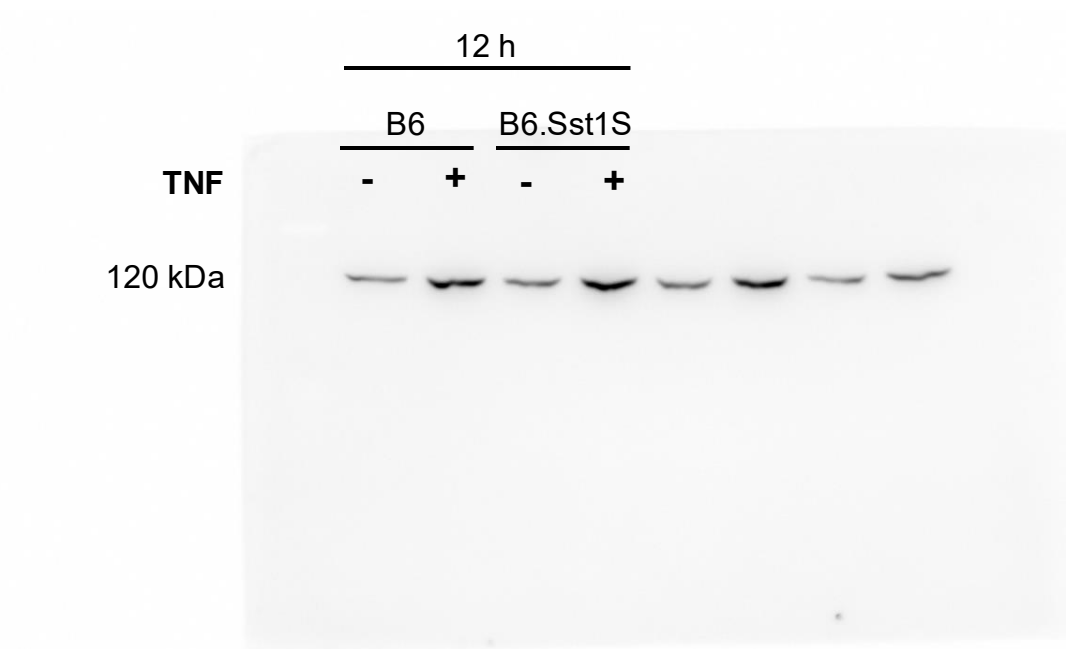

Figure 3K:  $\beta$ -tubulin- 12 h

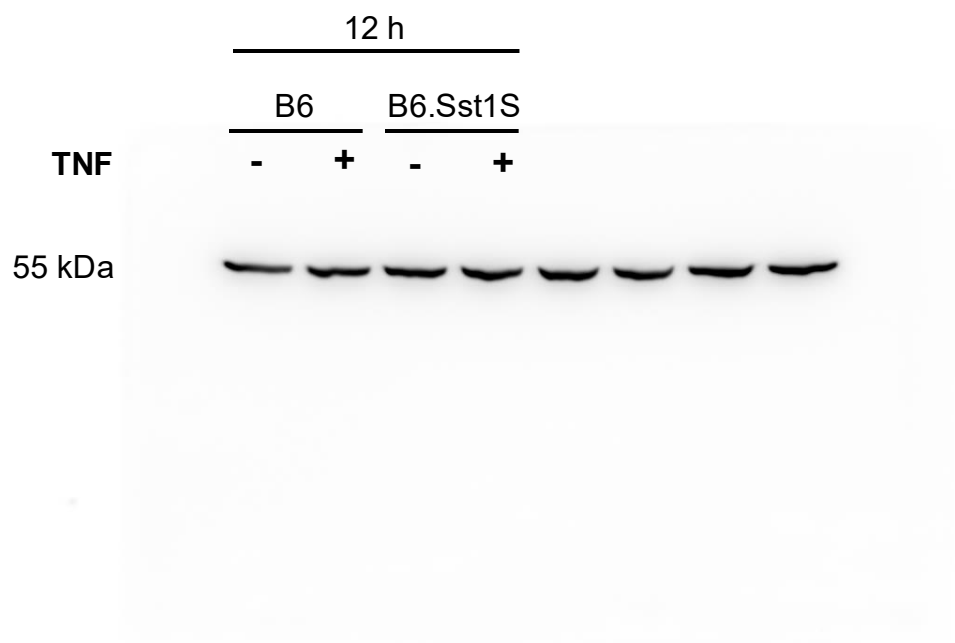

Figure 3K: p-cJun- 24 h

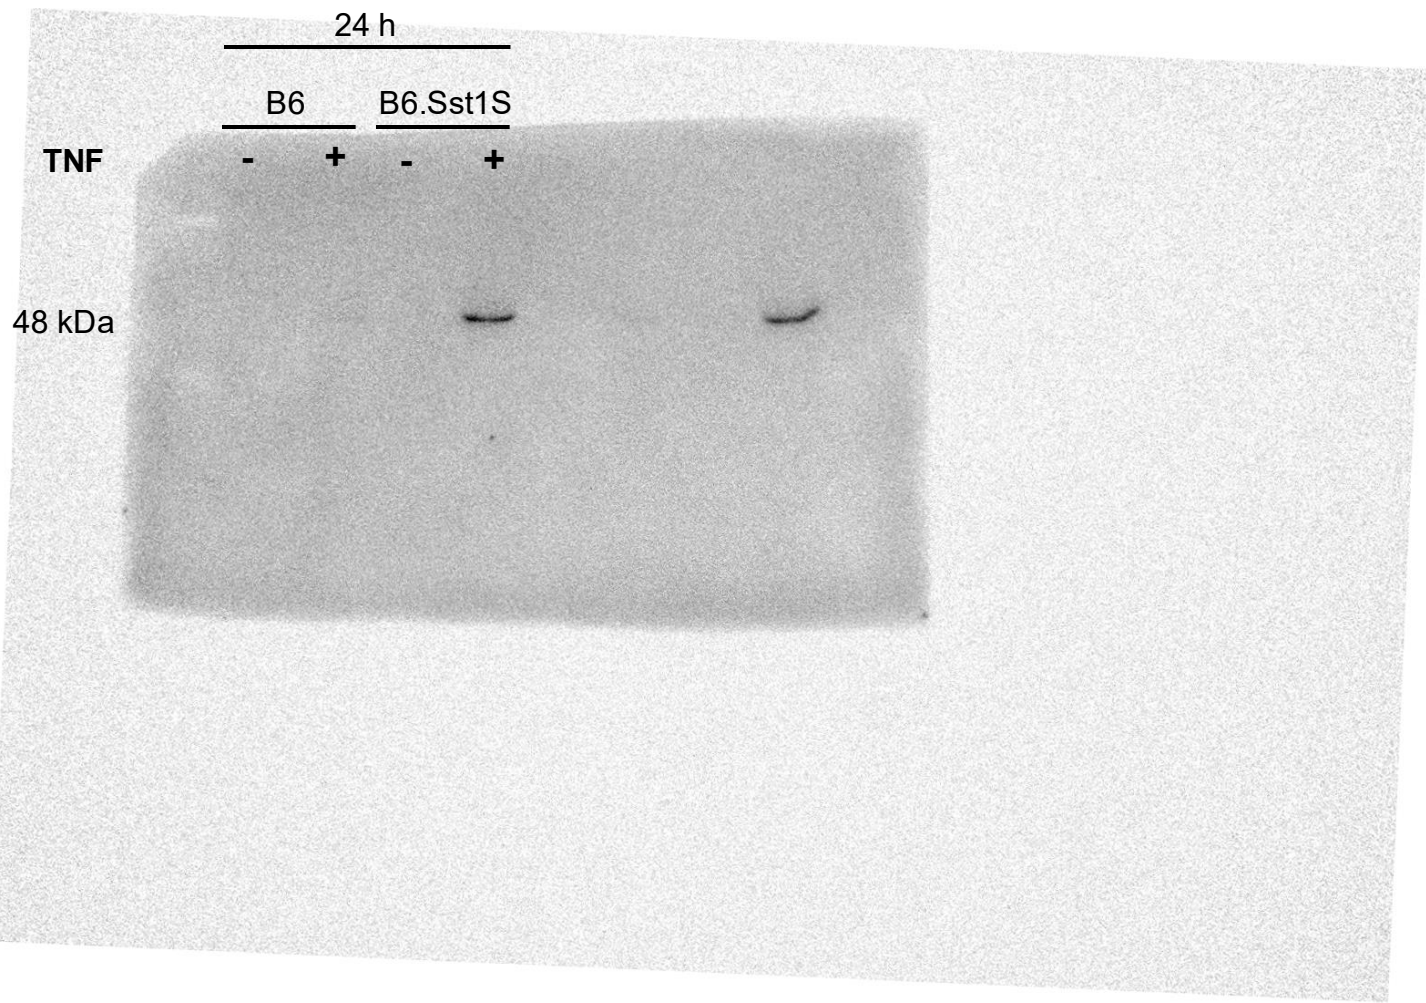

Figure 3K: p-ASK1- 24 h

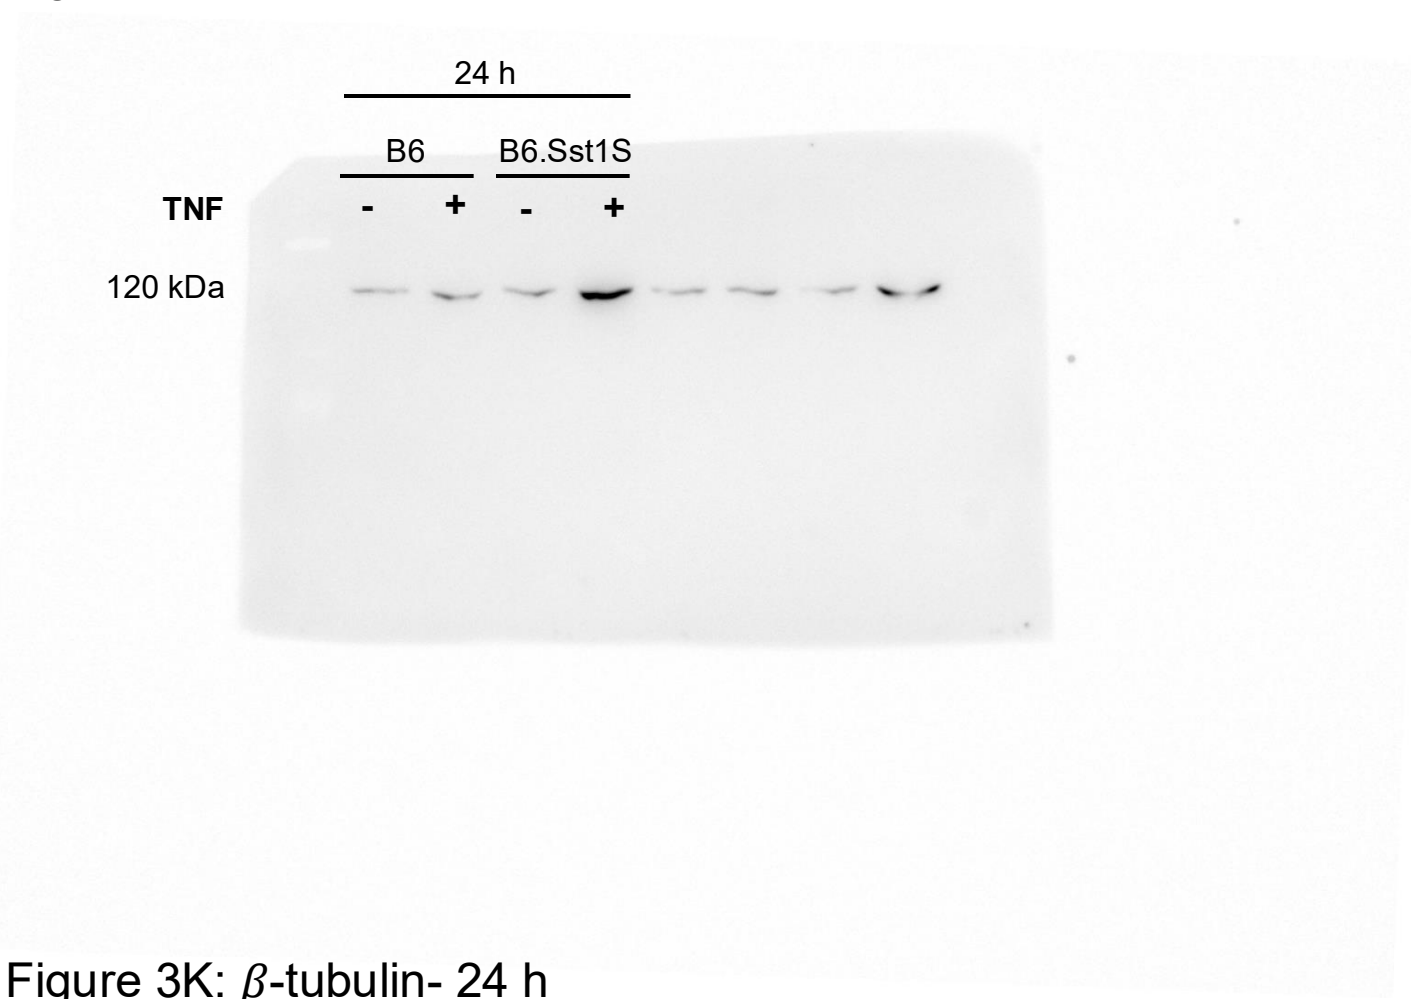

Figure 3K:  $\beta$ -tubulin- 24 h

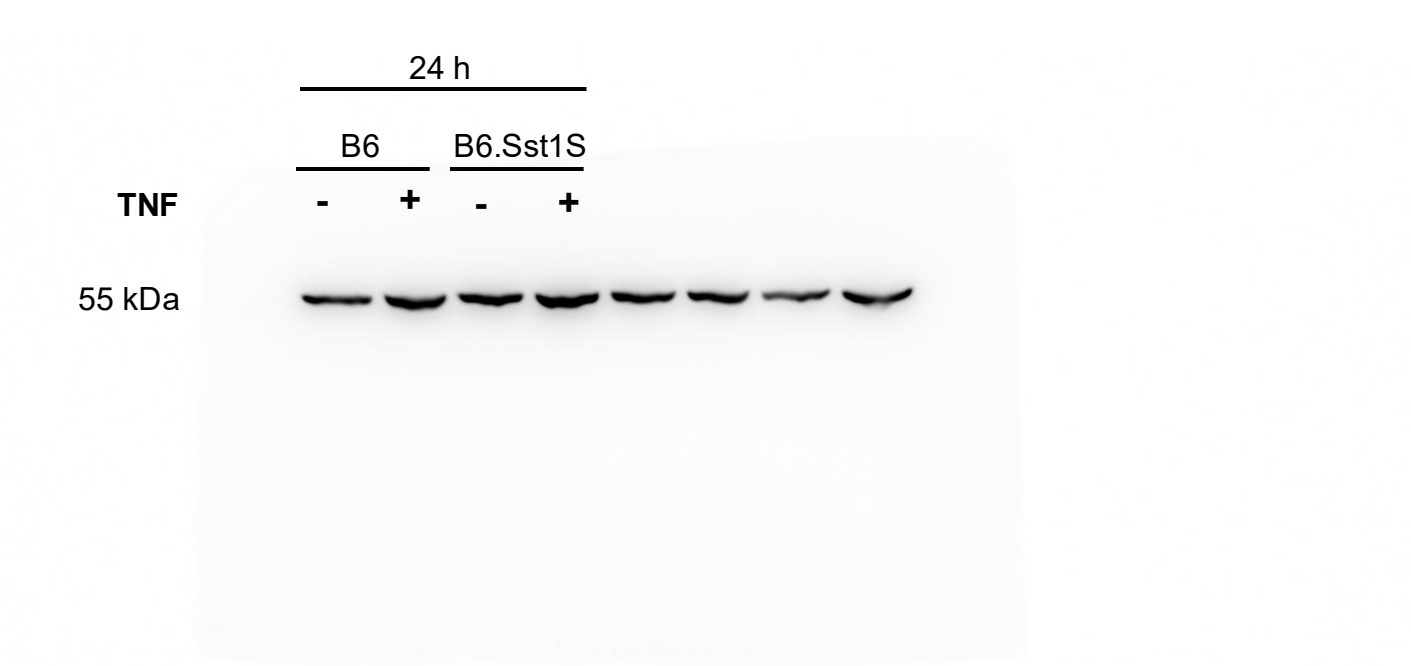

Figure 3K: p-cJun- 36 h

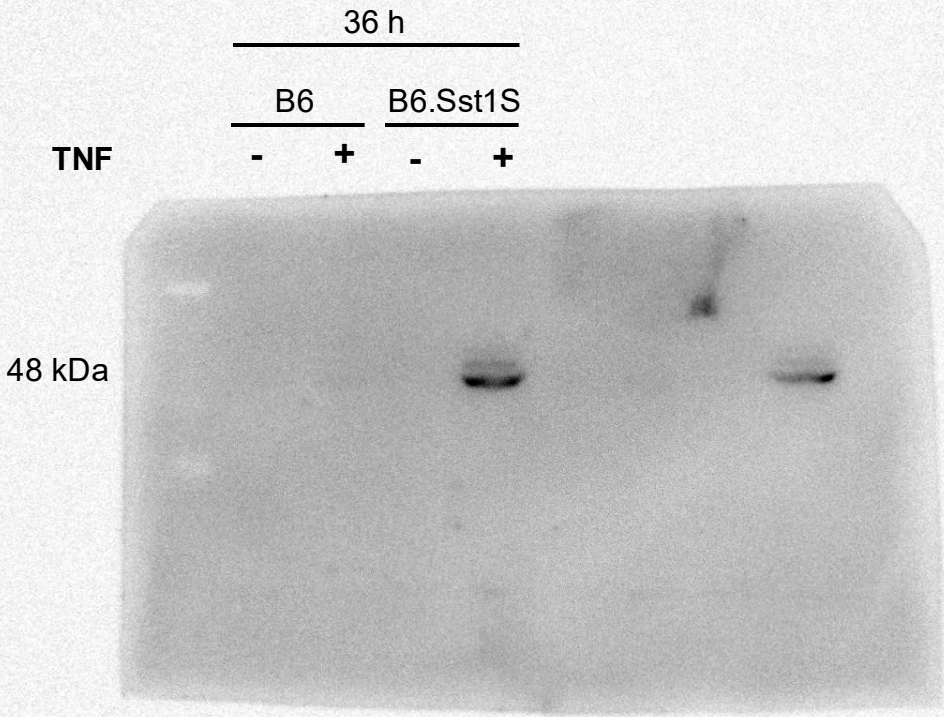

Figure 3K: p-ASK1- 36 h

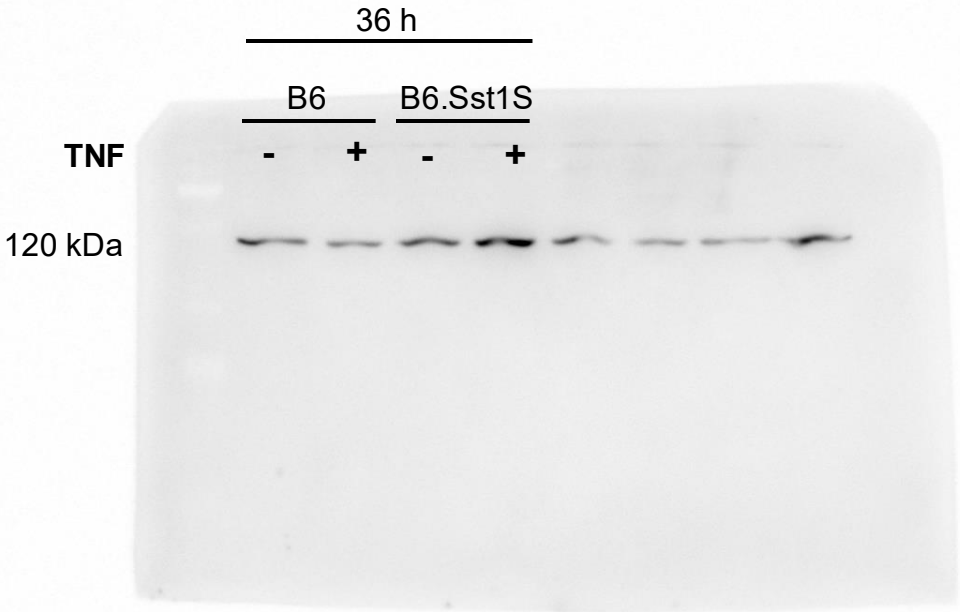



Figure 3K:  $\beta$ -tubulin- 36 h

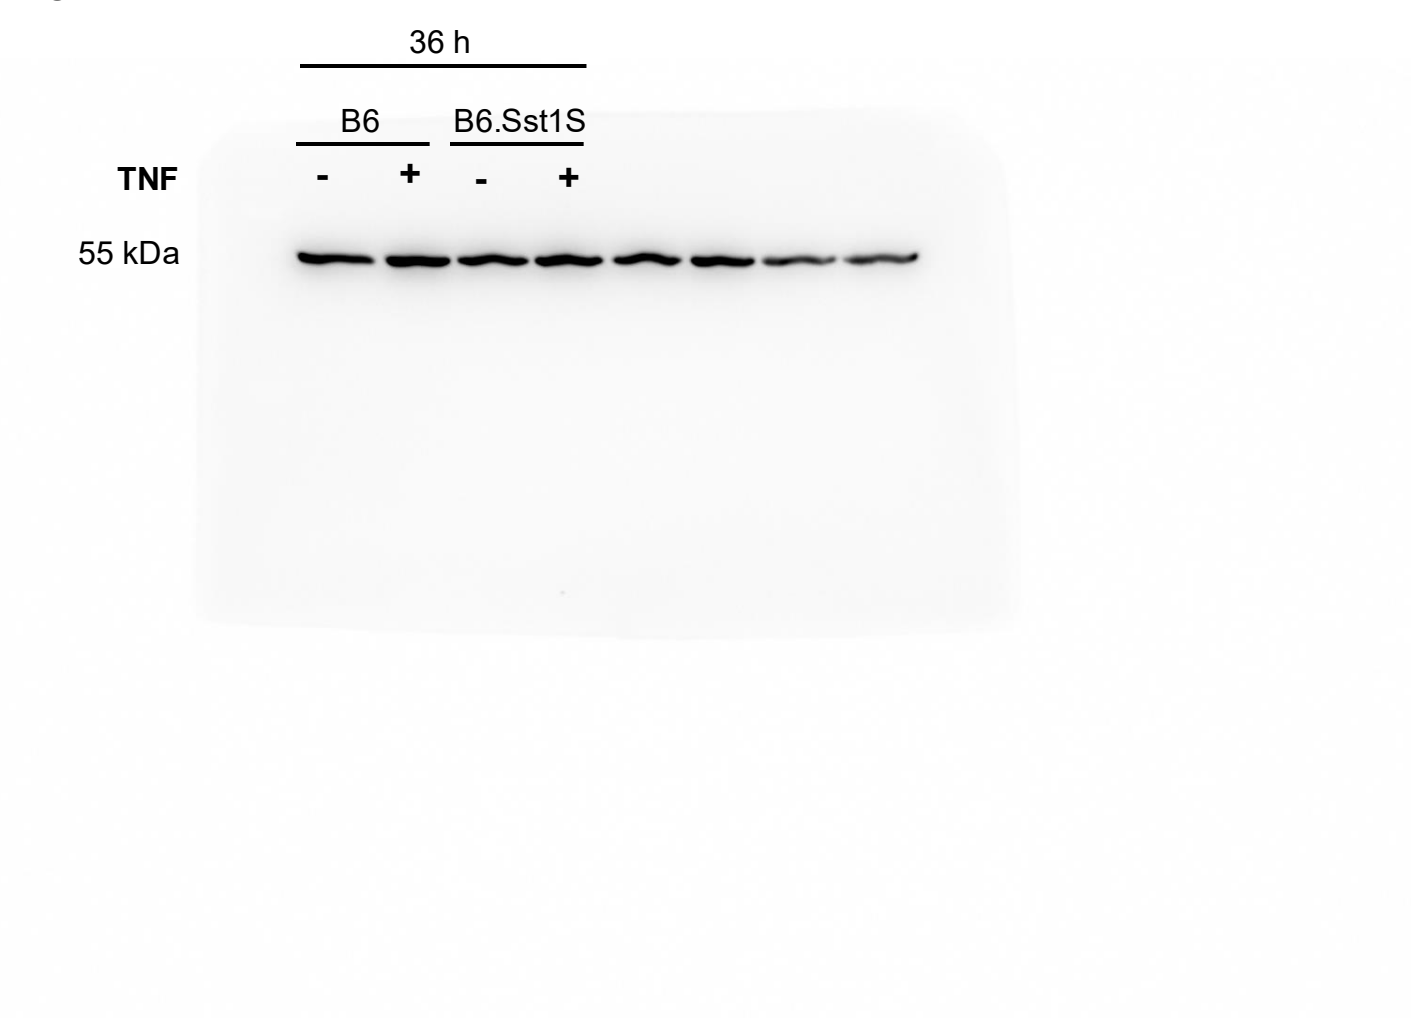

Supplement: fig3-data1 [file elife-106814-fig3-data1-v1.zip]
