# Supplementary material for: Lipid Peroxidation and Type I Interferon Coupling Fuels Pathogenic Macrophage Activation Causing Tuberculosis Susceptibility
Source: eLife journal article supplement (doi:10.7554/elife.106814), 2025-08-29

Figure 5B: c-Myc- 6 h

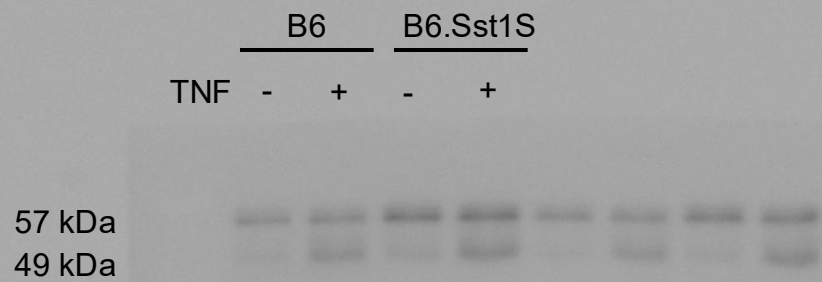

Figure 5B:  $\beta$ -tubulin- 6 h

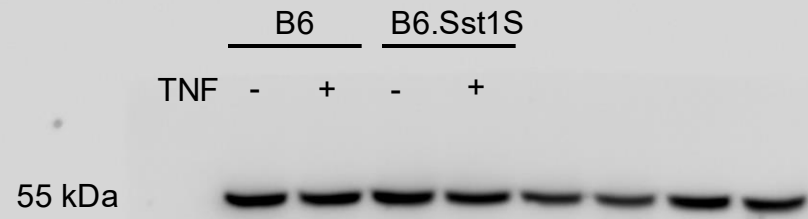

Figure 5B: c-Myc- 12 h

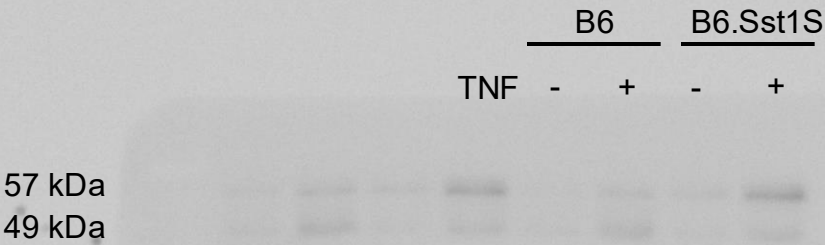

Figure 5B:  $\beta$ -tubulin- 12 h

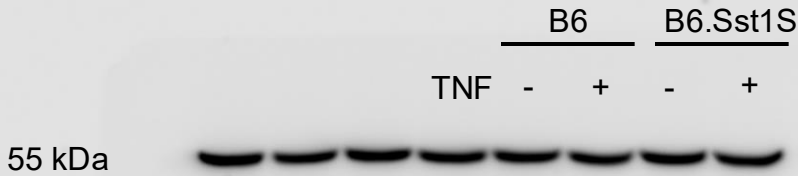

Figure 5C: Fth

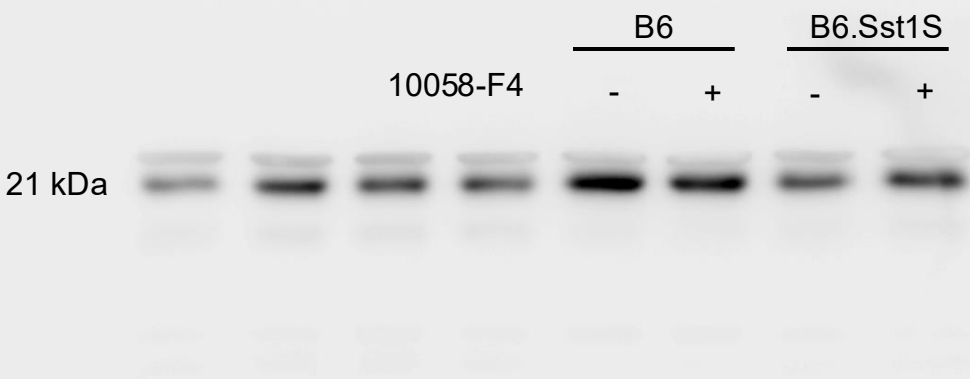

Figure 5C: Ftl

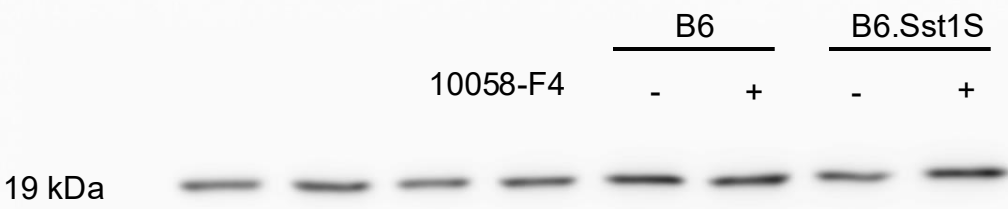

Western blot analysis showing MyoD expression (55 kDa) in B6 and B6.Sst1S mice. The blot is probed with anti-MyoD antibody. Lanes are labeled as follows:

|          | B6                                           |   | B6.Sst1S |   |
|----------|----------------------------------------------|---|----------|---|
| 10058-F4 | -                                            | + | -        | + |
| 55 kDa   | [Western blot bands showing MyoD expression] |   |          |   |

The blot shows a single band at 55 kDa for all lanes. The intensity of the band is significantly higher in the B6.Sst1S + 10058-F4 lane compared to the other lanes.

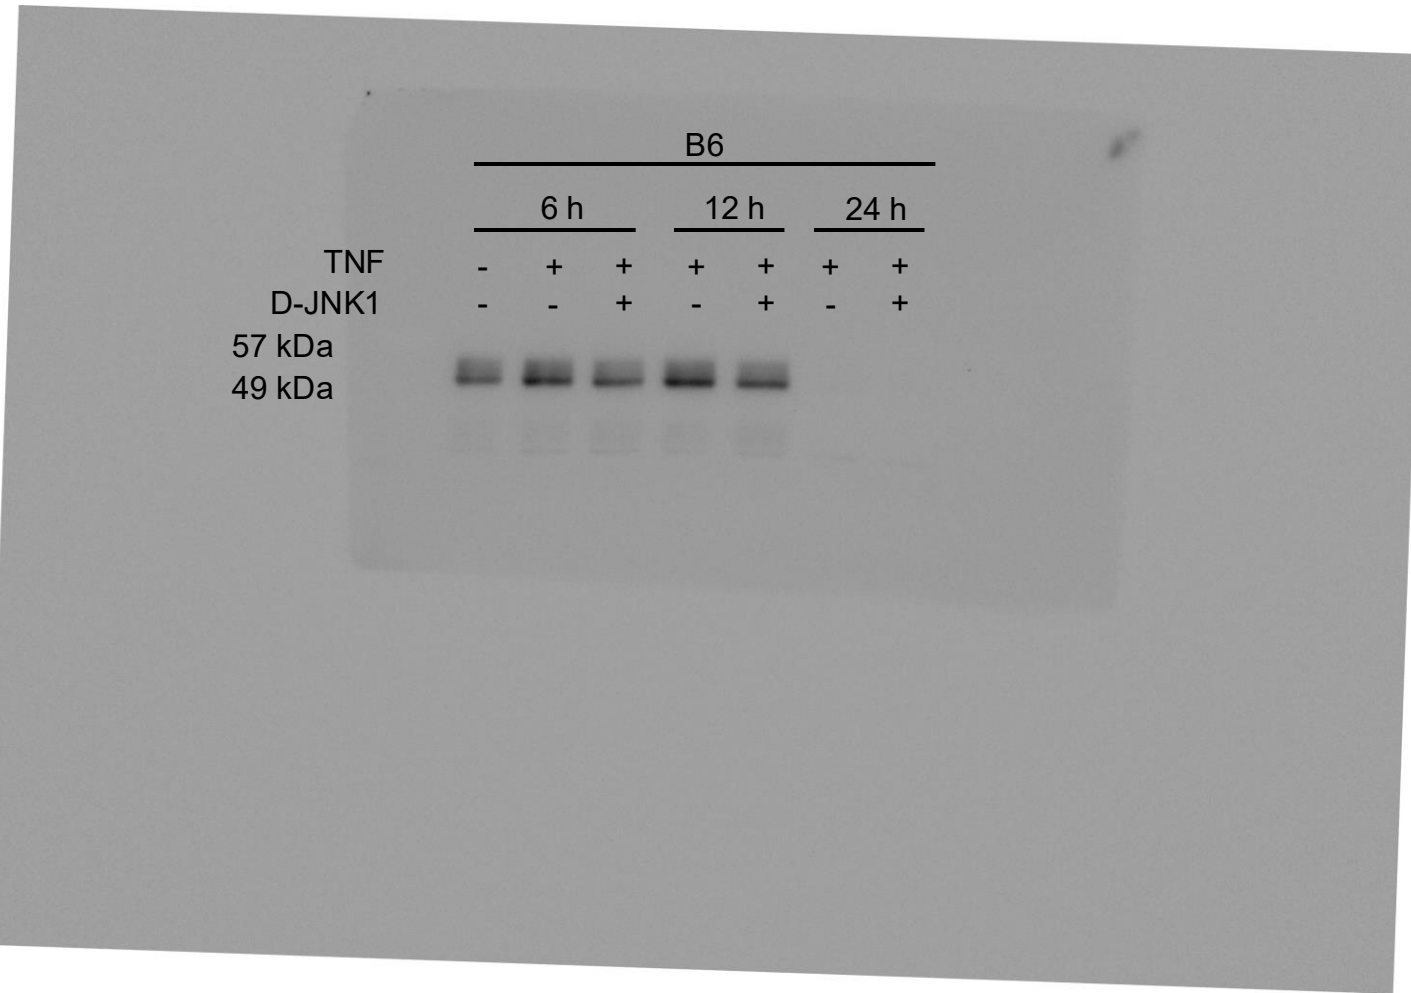

### Figure 5l: c-Myc



Figure 5l: p-cJun

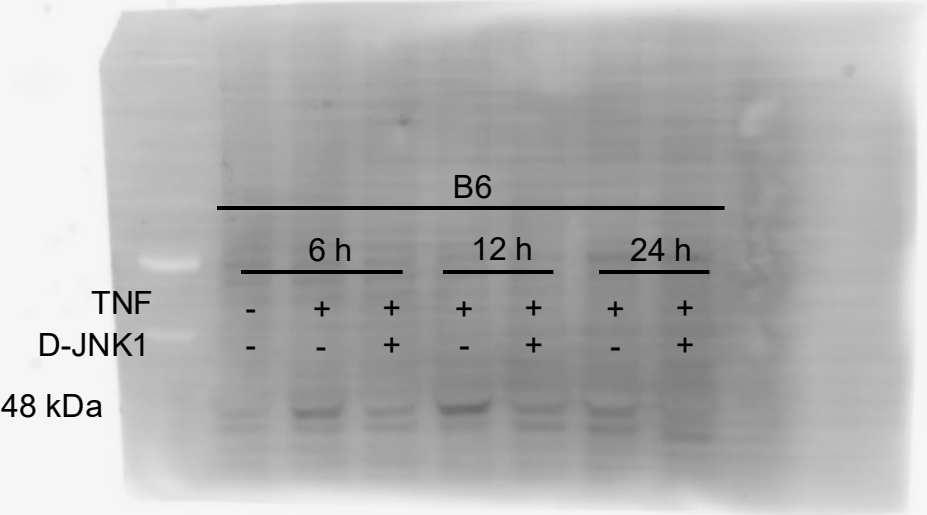

Figure 5l:  $\beta$ -tubulin

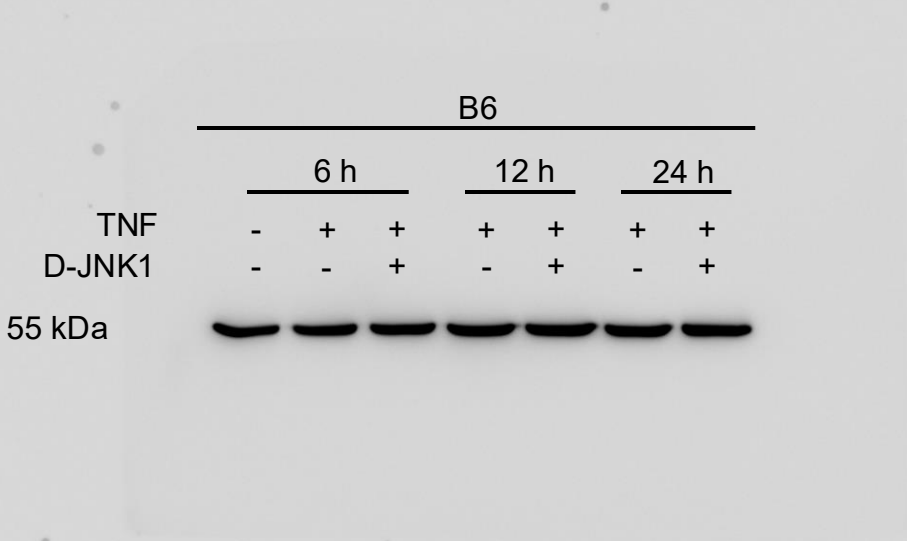

Figure 5J: c-Myc

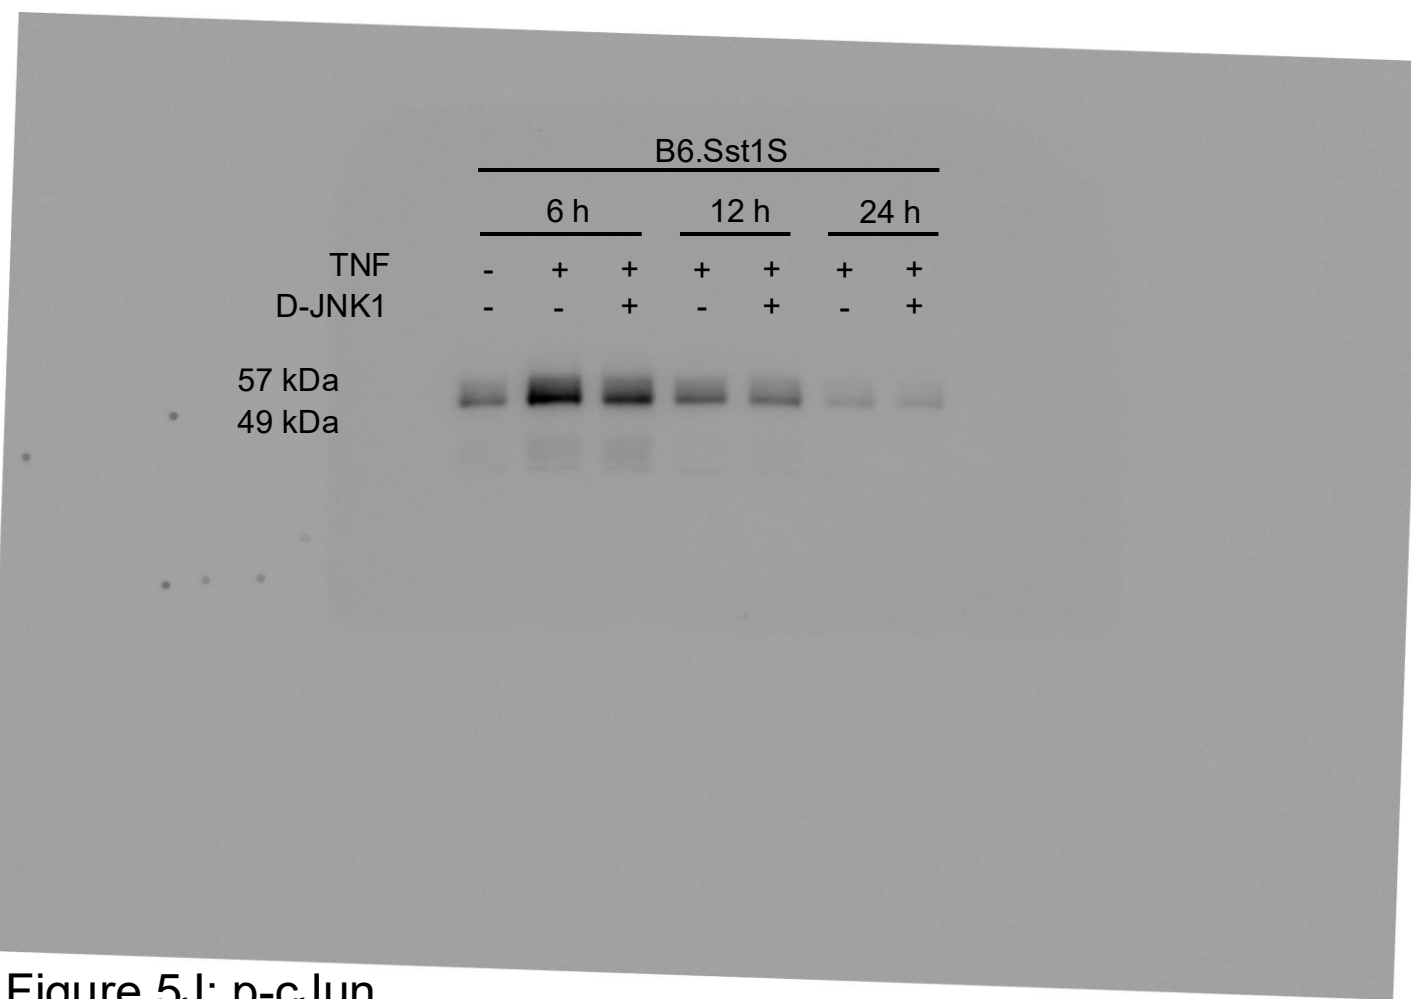

Figure 5J: p-cJun

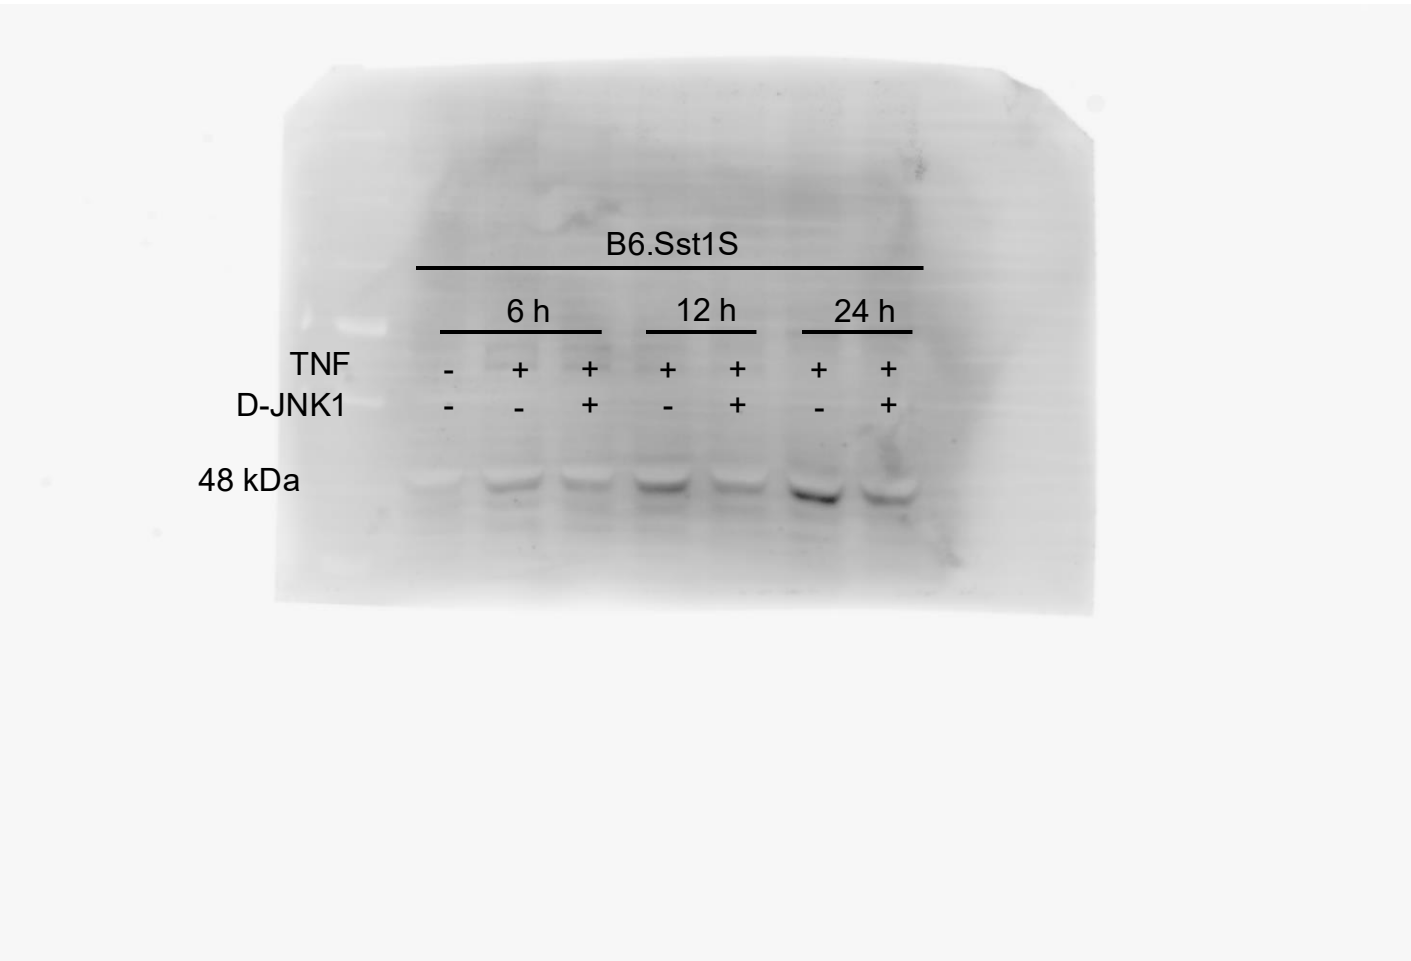

Figure 5J:  $\beta$ -tubulin

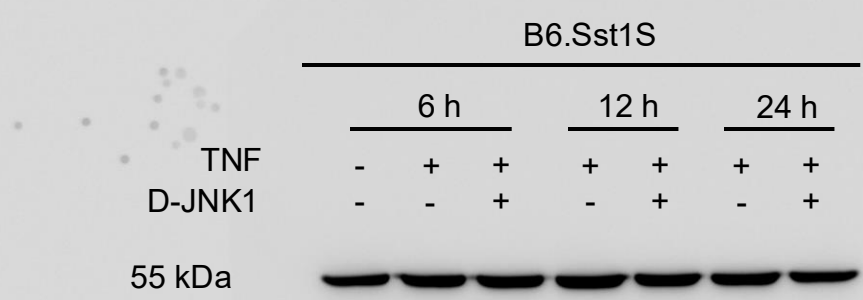

Supplement: fig5-data1 [file elife-106814-fig5-data1-v1.zip]
