# Supplementary material for: Lipid Peroxidation and Type I Interferon Coupling Fuels Pathogenic Macrophage Activation Causing Tuberculosis Susceptibility
Source: eLife journal article supplement (doi:10.7554/elife.106814), 2025-08-29

Figure 2A: Nrf2

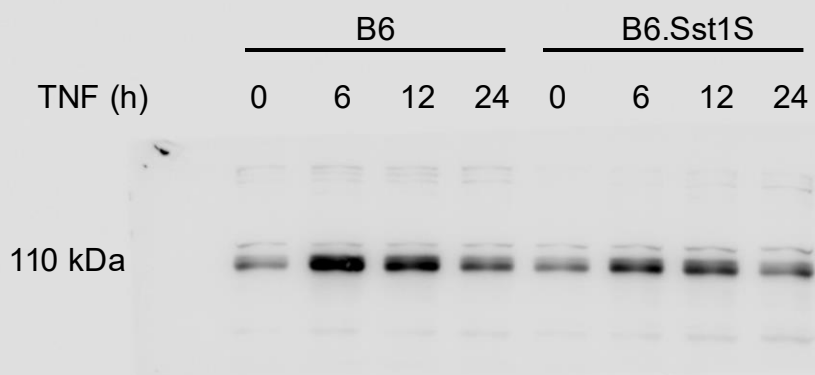

Figure 2A:  $\beta$ -tubulin

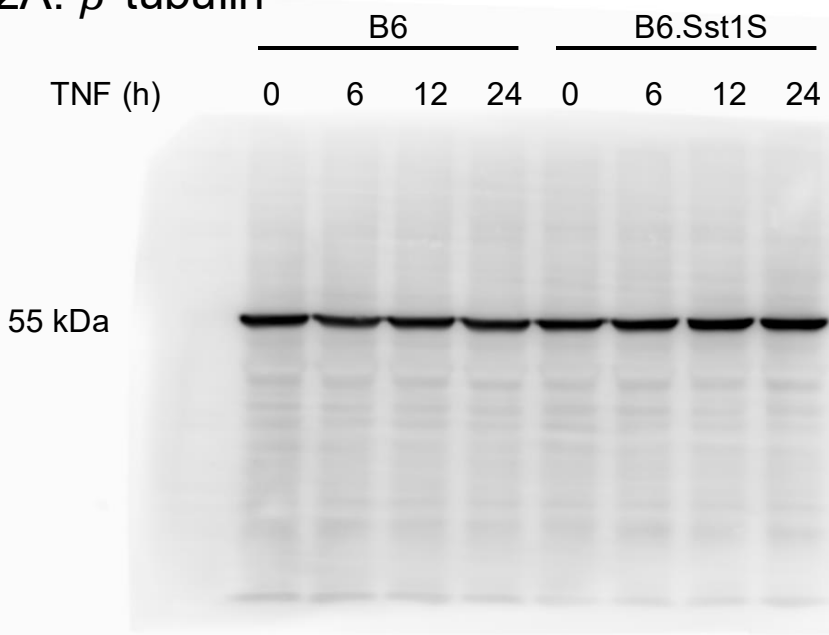

Figure 2B and 2C: Bach1

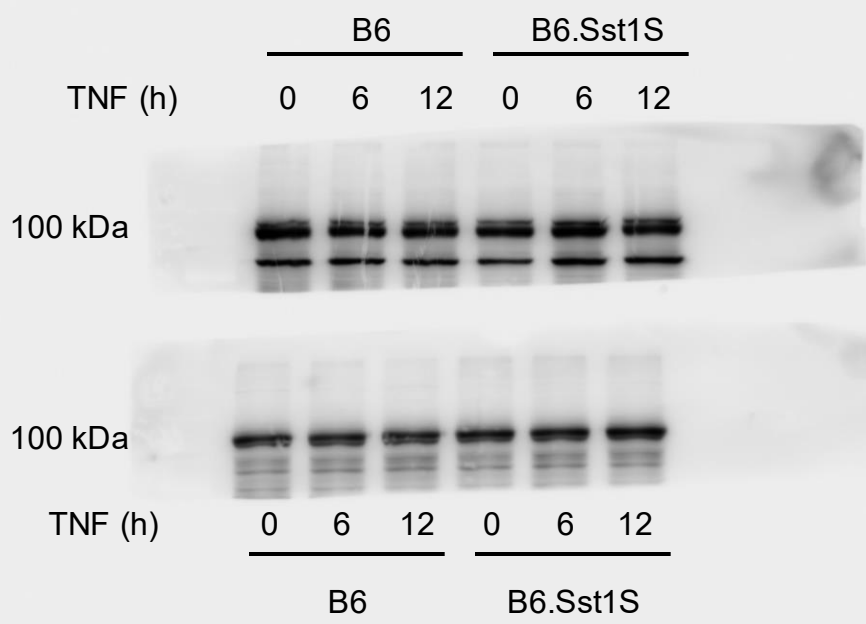

Figure 2C:  
Nuclear fraction

Figure 2B:  
Cytoplasmic  
fraction

Figure 2B and 2C: Nrf2

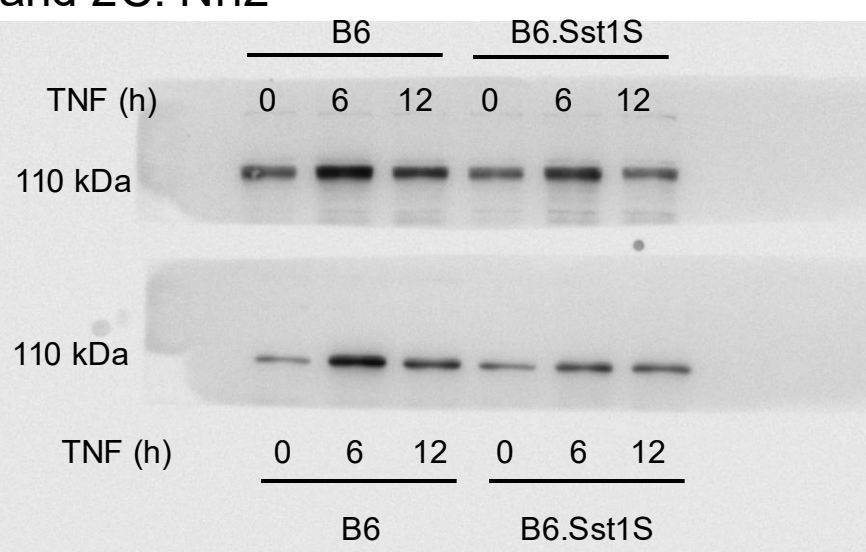

Figure 2C:  
Nuclear  
fraction

Figure 2B:  
Cytoplasmic  
fraction

Figure 2B:  $\beta$ -tubulin

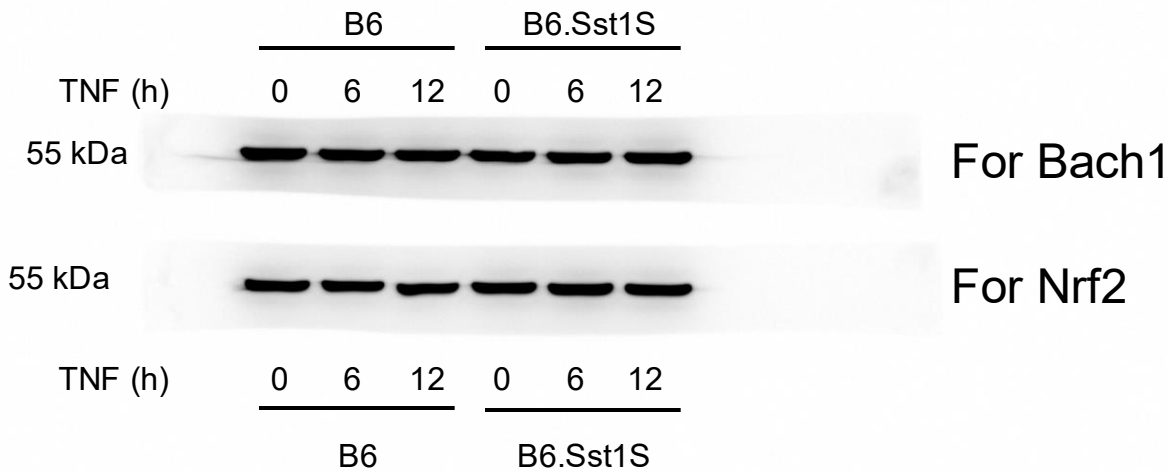

Figure 2C: Histone H3

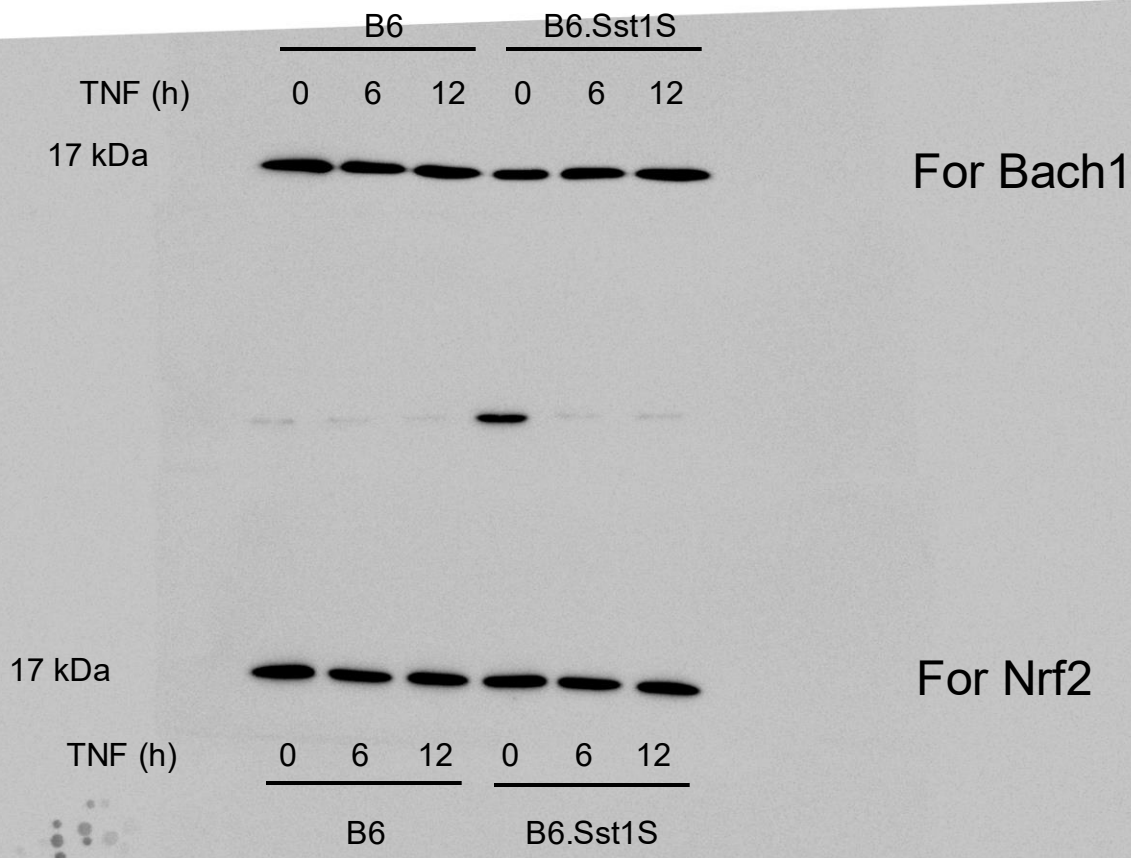

Figure 2H: Nrf2

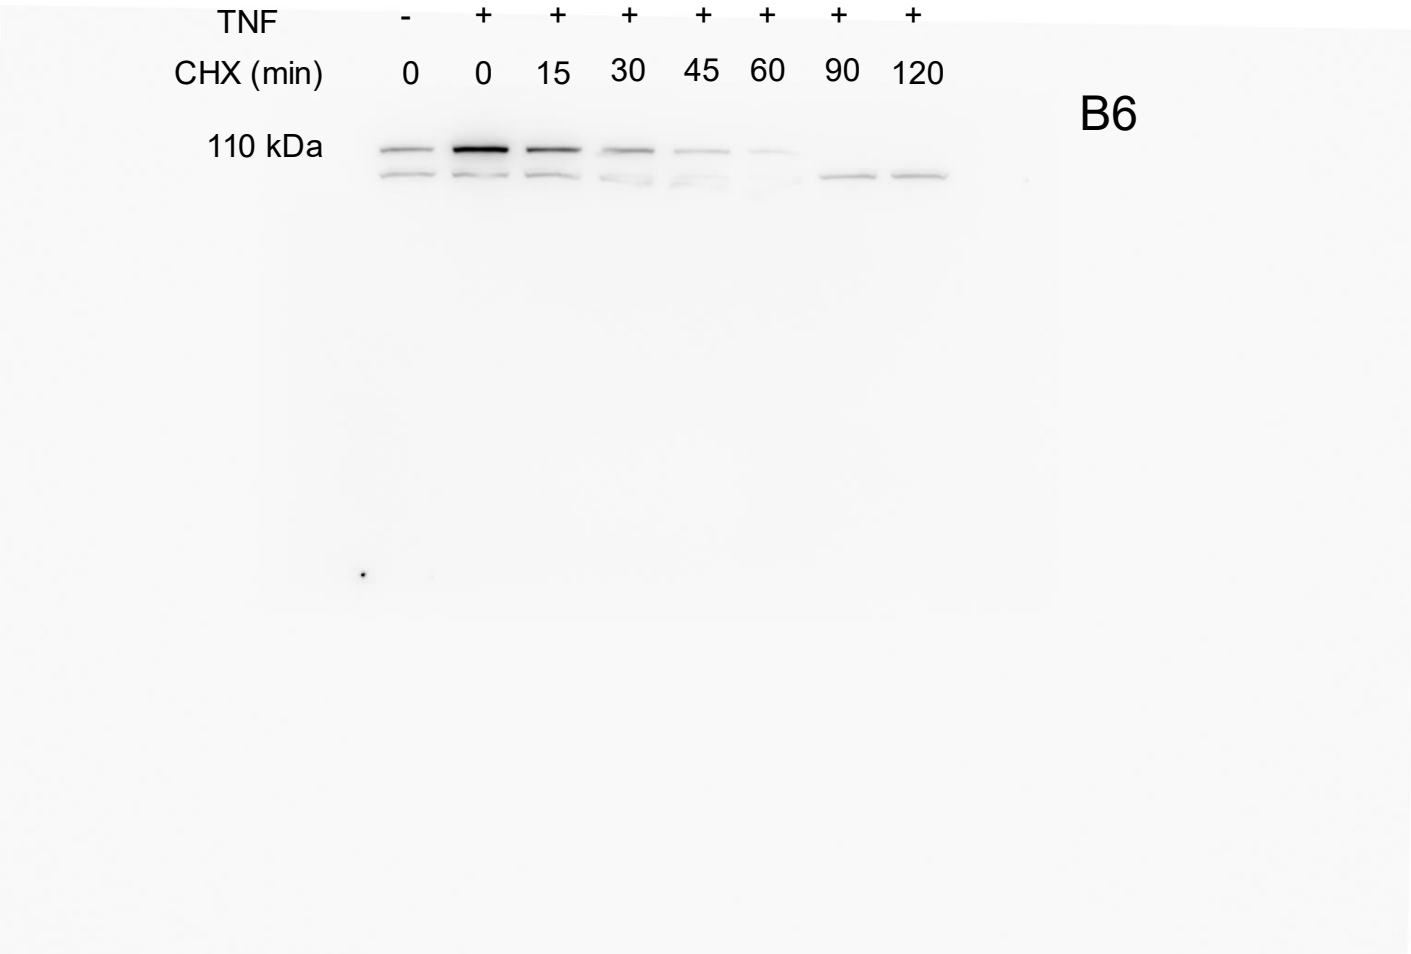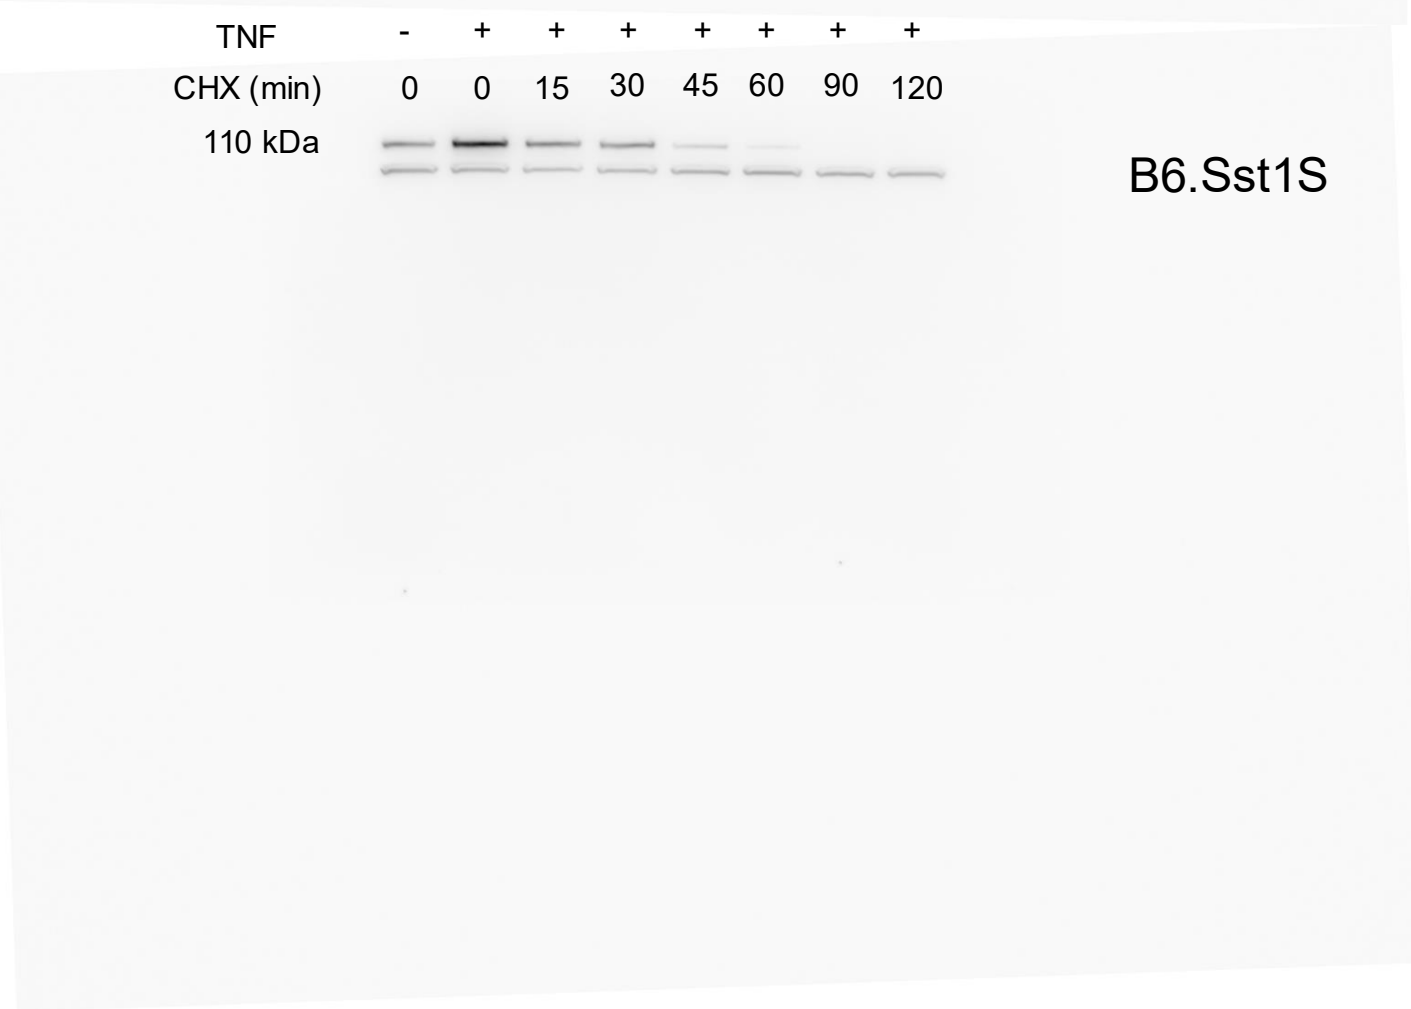

Figure 2H:  $\beta$ -tubulin

|           |   |   |    |    |    |    |    |     |
|-----------|---|---|----|----|----|----|----|-----|
| TNF       | - | + | +  | +  | +  | +  | +  | +   |
| CHX (min) | 0 | 0 | 15 | 30 | 45 | 60 | 90 | 120 |

55 kDa

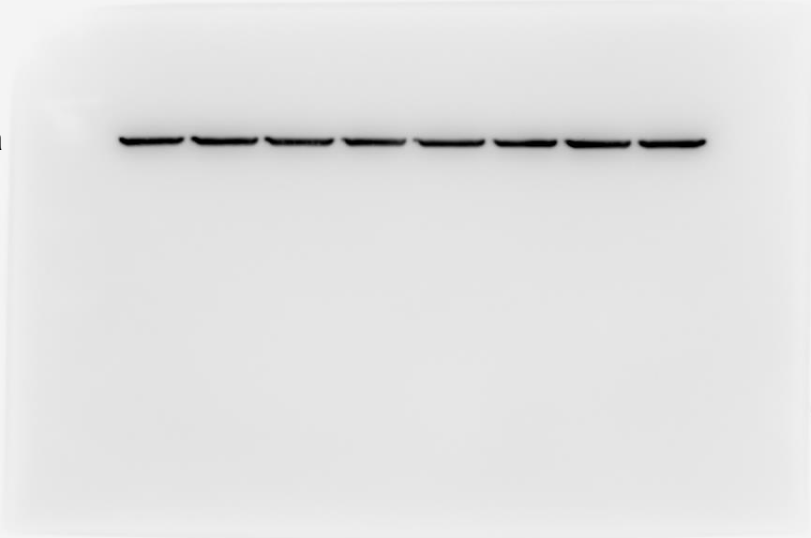

B6

|           |   |   |    |    |    |    |    |     |
|-----------|---|---|----|----|----|----|----|-----|
| TNF       | - | + | +  | +  | +  | +  | +  | +   |
| CHX (min) | 0 | 0 | 15 | 30 | 45 | 60 | 90 | 120 |

55 kDa

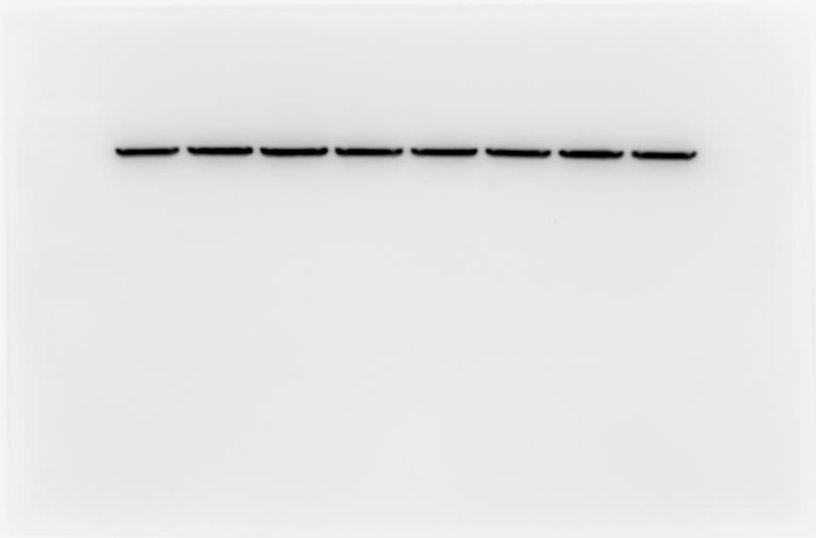

B6.Sst1S

Figure 2I: EMSA

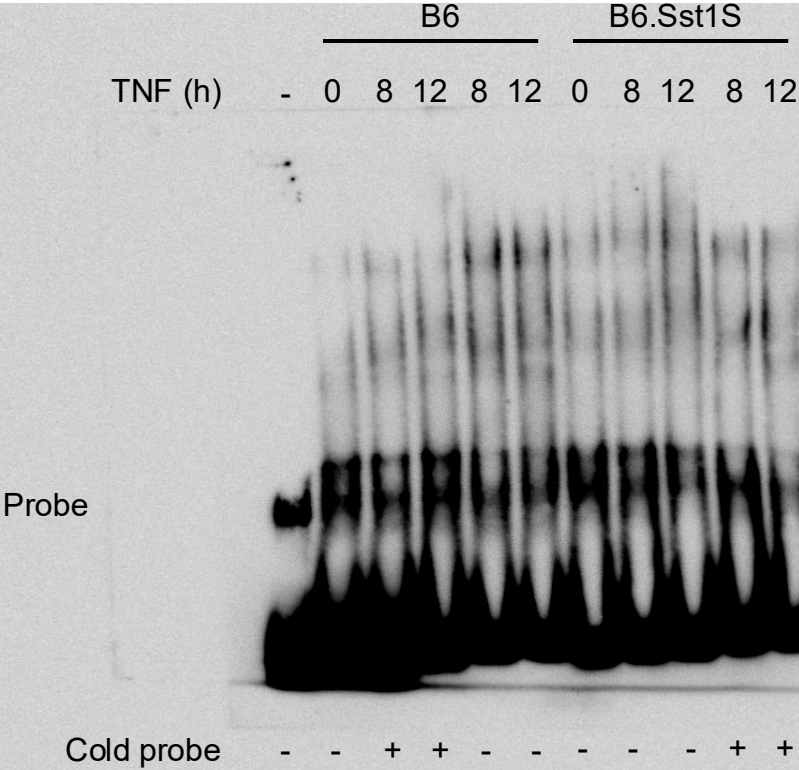

Supplement: fig2-data1 [file elife-106814-fig2-data1-v1.zip]
