# Supplementary material for: Lipid peroxidation and type I interferon coupling fuels pathogenic macrophage activation causing tuberculosis susceptibility
Source: eLife. 2025 Oct 2;14:RP106814. doi: 10.7554/eLife.106814 (PMC12490860; doi:10.7554/eLife.106814)
Supplement: Supplementary file 8. [file elife-106814-supp8.xlsx]

## Sheet: Table of Contents
Expression of IFN pathway genes in Iba1+ cells from pauci- and multi-bacillary lesions of Mtb infected B6.Sst1S mouse lungs
Table ID	Worksheet Name	Comment	Analysis Tool Used	Analysis Tool Used	Database Used
1	Table 1 IFN Filter Multi- vs Paucibacillary q05FC1.5	List & Heat Map of 70 Differentially Expressed Genes in Iba1+ cells in Multi- vs Paucibacillary lesions q05 FC1.5	Qlucore Omics Explorer	https://qlucore.com
		Filtered by Pooled List of IFN Type I & II genes from common public datasets (from Table 4)
2	Table 2 HallmrkPwys IFN Filter Multi- vs Paucibacillary q05FC1.5	HallMark Pathways Enriched in Genes Up in Mutibacillary lesions (from Table 1)	Enrichr	https://maayanlab.cloud/Enrichr/	MSigDB Hallmark 2020
3	Table 3 TRRUSTTFs IFN Filter Multi- vs Paucibacillary q05FC1.5	Transcription Factors Enriched in Genes Up in Multibacillary lesions (from Table 1)	Enrichr	https://maayanlab.cloud/Enrichr/	TRRUST Transcription Factors 2019
4	Table 4 Pool TypeI&II Genes	List of Unique Genes in Pool of Type I and Type II Gene Sets	Reactome	https://reactome.org	Reactome
			Toppgene	https://toppgene.cchmc.org/enrichment.jsp	Toppgene
			GSEA	https://www.gsea-msigdb.org/gsea/msigdb/genesets.jsp?collection=H	GSEA

## Sheet: Table 1 IFN Filter MvsPq05FC1.5
Gene	q-value	Fold change		Up in Multibacillary		Up in Paucibacillary
Mmp12	3.44794e-05	7.58441		Mmp12		Ciita
Ifitm1	2.42799e-09	4.17275		Ifitm1		Kpna2
Upp1	8.60938e-05	3.31126		Upp1		Gmpr
Ccl2	0.00327565	3.22879		Ccl2		Stat4
Fpr1	4.10165e-05	3.15961		Fpr1		Gpr18
Ccl3	0.000389986	3.14522		Ccl3		Tor1b
Cfh	0.000202718	3.06186		Cfh		Nup43
Ptgs2	0.00126692	2.95719		Ptgs2		Cyp11b1
Ccl7	0.00304346	2.84135		Ccl7		Slc30a8
Il6	0.00635422	2.58798		Il6		Camk2b
Acod1	8.69302e-05	2.58396		Acod1		Nup210
Arg1	0.0010473	2.50056		Arg1		Slc26a6
Serping1	4.9555e-05	2.29399		Serping1		Gzma
Procr	0.00386107	2.21131		Procr		Ifi44l
Ccl4	0.0182196	2.17316		Ccl4
Nos2	0.00955469	2.13295		Nos2
Cd38	0.00860069	2.11926		Cd38
Ass1	0.000120149	2.10348		Ass1
Myd88	0.0213813	2.07776		Myd88
Tlr2	0.00683223	2.03989		Tlr2
Lamp3	0.017579	1.98992		Lamp3
Socs3	0.00768158	1.97348		Socs3
Ube2l6	0.0011804	1.95904		Ube2l6
Cxcl10	0.020897	1.95206		Cxcl10
Pim1	1.88565e-07	1.91437		Pim1
Ifitm2	1.79577e-05	1.90113		Ifitm2
Capg	8.57735e-05	1.88048		Capg
Ifit2	0.0335591	1.86473		Ifit2
Ptpn1	0.000216574	1.85509		Ptpn1
Nfkbia	0.000389986	1.8423		Nfkbia
Arg2	0.00533473	1.84128		Arg2
Ccl19	0.0318785	1.82707		Ccl19
Pla2g4a	0.018971	1.82581		Pla2g4a
Gapdh	9.99548e-06	1.81634		Gapdh
Pnp	8.60938e-05	1.80099		Pnp
Trim25	0.0169147	1.79517		Trim25
Sod2	7.55479e-05	1.78024		Sod2
Tnfaip2	0.000222376	1.74939		Tnfaip2
Cdkn1a	4.31172e-05	1.73043		Cdkn1a
Nup62	0.00470017	1.68909		Nup62
Stx11	0.00751126	1.68622		Stx11
Cd44	9.31746e-05	1.68622		Cd44
Casp4	0.0275989	1.68074		Casp4
Oas2	0.0313616	1.67841		Oas2
Hck	0.0217088	1.67503		Hck
Mov10	0.0354788	1.67021		Mov10
Csf2rb	0.0143861	1.66996		Csf2rb
Icam1	0.000120149	1.66239		Icam1
Gch1	0.0372118	1.65214		Gch1
P2ry14	0.0280873	1.65138		P2ry14
Nr1h3	0.00470017	1.62447		Nr1h3
Ifitm3	0.00250284	1.61611		Ifitm3
Ifih1	0.041457	1.60598		Ifih1
Pde4b	0.0157344	1.59436		Pde4b
Hif1a	0.0067036	1.54723		Hif1a
Eif4a1	4.09026e-06	1.52801		Eif4a1
Ciita	0.000389986	0.658424
Kpna2	0.00370647	0.617465
Gmpr	0.0360255	0.551136
Stat4	0.041457	0.548922
Gpr18	0.0379859	0.54083
Tor1b	0.0153507	0.535244
Nup43	0.00955469	0.505148
Cyp11b1	0.0217088	0.5046
Slc30a8	0.0251417	0.49978
Camk2b	0.0329613	0.49196
Nup210	0.0129871	0.469365
Slc26a6	0.00219905	0.372521
Gzma	0.000120149	0.246367
Ifi44l	2.04505e-07	0.145761

## Sheet: Table 2 HallmrkPwy MvsPq05FC1.5
Term	Overlap	P-value	Adjusted P-value	Odds Ratio	Combined Score	Genes
Interferon Gamma Response	34 of 200	9.32937e-55	2.89211e-53	184.133	22907.7	IFITM3;CDKN1A;IFITM2;CFH;TNFAIP2;FPR1;UBE2L6;CSF2RB;PTGS2;HIF1A;IFIT2;ICAM1;IFIH1;SOCS3;PNP;CCL7;CASP4;PIM1;PDE4B;CD38;TRIM25;CCL2;UPP1;PTPN1;GCH1;P2RY14;PLA2G4A;SOD2;NFKBIA;CXCL10;IL6;OAS2;SERPING1;MYD88
TNF-alpha Signaling via NF-kB	17 of 200	3.48922e-21	5.40828e-20	47.0698	2217.2	CDKN1A;GCH1;TNFAIP2;PTGS2;SOD2;IFIT2;ICAM1;IFIH1;NFKBIA;SOCS3;CXCL10;IL6;CCL4;PDE4B;CCL2;CD44;TLR2
Inflammatory Response	14 of 200	2.53589e-16	2.62042e-15	35.4086	1271.55	IFITM1;CDKN1A;GCH1;FPR1;HIF1A;ICAM1;NFKBIA;CXCL10;IL6;CCL7;LAMP3;PDE4B;CCL2;TLR2
IL-6/JAK/STAT3 Signaling	11 of 87	6.96054e-16	5.39442e-15	63.9029	2230.28	SOCS3;PTPN1;CXCL10;IL6;CCL7;PIM1;CD38;CSF2RB;CD44;MYD88;TLR2
Interferon Alpha Response	11 of 97	2.42165e-15	1.50143e-14	56.4439	1899.58	IFITM3;IFIH1;PROCR;CXCL10;MOV10;IFITM1;IFITM2;LAMP3;TRIM25;UBE2L6;IFIT2
Allograft Rejection	10 of 200	1.90479e-10	9.84143e-10	22.6018	505.862	IL6;CCL7;NOS2;CCL4;CCL2;CAPG;CCL19;HIF1A;ICAM1;TLR2
Apoptosis	8 of 161	1.51518e-08	6.71006e-08	21.5588	388.17	IFITM3;CDKN1A;IL6;GCH1;CASP4;CD38;SOD2;CD44
Complement	7 of 200	1.37894e-06	5.34339e-06	14.6195	197.279	MMP12;IL6;CFH;CASP4;PIM1;PLA2G4A;SERPING1
IL-2/STAT5 Signaling	6 of 199	1.93128e-05	6.65218e-05	12.2804	133.301	IFITM3;CXCL10;PNP;PIM1;CAPG;CD44
UV Response Up	5 of 158	7.96988e-05	0.000247066	12.6817	119.68	NFKBIA;IL6;GCH1;SOD2;ICAM1
Hypoxia	4 of 200	0.00237463	0.00566258	7.75039	46.8349	CDKN1A;IL6;PIM1;GAPDH
Xenobiotic Metabolism	4 of 200	0.00237463	0.00566258	7.75039	46.8349	ARG2;GCH1;ARG1;UPP1
KRAS Signaling Up	4 of 200	0.00237463	0.00566258	7.75039	46.8349	CXCL10;CFH;ARG1;PTGS2
mTORC1 Signaling	3 of 200	0.0185232	0.0358886	5.67388	22.6316	CDKN1A;PNP;GAPDH
Epithelial Mesenchymal Transition	3 of 200	0.0185232	0.0358886	5.67388	22.6316	IL6;CAPG;CD44
p53 Pathway	3 of 200	0.0185232	0.0358886	5.67388	22.6316	PROCR;CDKN1A;UPP1
PI3K/AKT/mTOR Signaling	2 of 105	0.0349859	0.0637978	7.13448	23.9206	CDKN1A;MYD88
Unfolded Protein Response	2 of 113	0.0399794	0.0688534	6.61762	21.3047	EIF4A1;CCL2
Coagulation	2 of 138	0.0571541	0.0932514	5.39434	15.4386	CFH;SERPING1
DNA Repair	2 of 150	0.0661601	0.102548	4.95395	13.4533	PNP;PDE4B
Estrogen Response Late	2 of 200	0.107998	0.159425	3.6936	8.22065	CD44;ASS1
Reactive Oxygen Species Pathway	1 of 49	0.128516	0.18109	7.53636	15.4624	SOD2
Pperoxisome	1 of 104	0.253502	0.341677	3.50238	4.80661	SOD2
Fatty Acid Metabolism	1 of 158	0.359028	0.430842	2.29149	2.34729	UBE2L6
G2-M Checkpoint	1 of 200	0.430842	0.430842	1.80402	1.51901	HIF1A
Estrogen Response Early	1 of 200	0.430842	0.430842	1.80402	1.51901	CD44
Myogenesis	1 of 200	0.430842	0.430842	1.80402	1.51901	CDKN1A
Apical Junction	1 of 200	0.430842	0.430842	1.80402	1.51901	ICAM1
E2F Targets	1 of 200	0.430842	0.430842	1.80402	1.51901	CDKN1A
Myc Targets V1	1 of 200	0.430842	0.430842	1.80402	1.51901	EIF4A1
Glycolysis	1 of 200	0.430842	0.430842	1.80402	1.51901	CD44

## Sheet: Table 3 TRRUSTTFs MvsPq05FC1.5
Term	Overlap	P-value	Adjusted P-value	Odds Ratio	Combined Score	Genes
RELA human	18 of 301	1.19527e-19	2.97622e-17	32.9085	1433.85	CDKN1A;NOS2;PTGS2;SOD2;HIF1A;ICAM1;MMP12;NFKBIA;SOCS3;CXCL10;IL6;CCL4;CCL3;CD38;CCL2;UPP1;CCL19;TLR2
NFKB1 human	17 of 303	4.28309e-18	5.33244e-16	29.9611	1198.2	CDKN1A;NOS2;PTGS2;SOD2;HIF1A;ICAM1;NFKBIA;SOCS3;CXCL10;IL6;CCL4;CCL3;CD38;CCL2;UPP1;CCL19;TLR2
STAT1 human	11 of 84	4.64521e-16	3.85552e-14	66.5391	2349.2	SOCS3;CXCL10;CDKN1A;IL6;NOS2;PIM1;CCL3;CCL2;UPP1;PTGS2;ICAM1
RELA mouse	11 of 121	2.9578e-14	1.84123e-12	44.0756	1373.03	PTPN1;CXCL10;IL6;NOS2;CD38;CCL2;UPP1;PTGS2;SOD2;ICAM1;TLR2
NFKB1 mouse	12 of 200	2.72545e-13	1.35727e-11	28.6596	829.149	NFKBIA;CXCL10;CDKN1A;IL6;NOS2;CD38;PLA2G4A;CCL2;UPP1;PTGS2;SOD2;TLR2
STAT3 human	9 of 142	2.0255e-10	8.40582e-09	28.5233	636.641	SOCS3;CDKN1A;IL6;PIM1;CCL2;PTGS2;HIF1A;MYD88;ICAM1
REL human	5 of 22	3.63933e-09	1.29456e-07	114.919	2233.05	CDKN1A;IL6;CCL2;SOD2;ICAM1
IRF1 mouse	5 of 25	7.2959e-09	2.27085e-07	97.6667	1829.88	CXCL10;CDKN1A;NOS2;UPP1;MYD88
IKBKB mouse	4 of 12	2.68249e-08	7.42156e-07	191.692	3341.95	NFKBIA;CXCL10;CCL19;PTGS2
STAT1 mouse	5 of 34	3.74872e-08	9.3343e-07	67.3259	1151.22	SOCS3;CXCL10;IL6;NOS2;UPP1
SP1 mouse	9 of 270	5.673e-08	1.28416e-06	14.4409	240.947	SOCS3;CDKN1A;IL6;CCL2;NR1H3;PTGS2;SOD2;ICAM1;TLR2
JUN mouse	7 of 131	7.81523e-08	1.62166e-06	22.8341	373.671	MMP12;SOCS3;IL6;NOS2;CCL2;PTGS2;ICAM1
JUN human	7 of 149	1.889e-07	3.61815e-06	19.9215	308.426	MMP12;CDKN1A;IL6;NOS2;CCL2;PTGS2;SOD2
XBP1 human	4 of 19	2.07015e-07	3.68192e-06	102.2	1572.91	IL6;NOS2;CCL2;SOD2
CEBPA human	5 of 51	3.05244e-07	5.06705e-06	42.4084	636.217	SOCS3;IL6;CCL2;GAPDH;ICAM1
EP300 mouse	5 of 60	6.96245e-07	1.08353e-05	35.4528	502.634	SOCS3;CDKN1A;IL6;NOS2;PTGS2
HDAC1 mouse	4 of 28	1.0733e-06	1.57206e-05	63.8462	877.551	NFKBIA;CDKN1A;IL6;NOS2
JUND human	4 of 34	2.40089e-06	3.22452e-05	51.0615	660.719	CDKN1A;IL6;NOS2;PTGS2
HDAC2 mouse	3 of 10	2.46047e-06	3.22452e-05	161.216	2082.13	NFKBIA;CDKN1A;NOS2
STAT3 mouse	5 of 79	2.75948e-06	3.43555e-05	26.3249	336.97	SOCS3;IL6;PNP;NOS2;HIF1A
STAT2 human	3 of 11	3.37644e-06	4.0035e-05	141.057	1777.13	NOS2;CCL2;PTGS2
PPARA human	4 of 39	4.21413e-06	4.76963e-05	43.756	541.571	NFKBIA;IL6;PTGS2;SOD2
CEBPB mouse	4 of 42	5.6991e-06	6.1699e-05	40.2955	486.577	SOCS3;CDKN1A;IL6;PTGS2
AR human	5 of 93	6.17691e-06	6.40854e-05	22.1212	265.337	PTPN1;CDKN1A;ARG2;ARG1;PTGS2
PPARA mouse	4 of 46	8.24007e-06	8.2071e-05	36.4505	426.708	MMP12;NFKBIA;IL6;PTGS2
SIRT1 human	4 of 48	9.78462e-06	9.37066e-05	34.7902	401.295	CDKN1A;CFH;HIF1A;ICAM1
NR1H3 mouse	3 of 17	1.37503e-05	0.000126808	80.5795	902.043	ARG2;NOS2;NR1H3
SMARCA4 mouse	3 of 19	1.95165e-05	0.000173557	70.5	764.52	NFKBIA;CDKN1A;CD44
AHR mouse	3 of 22	3.08328e-05	0.000264737	59.3595	616.563	IL6;PLA2G4A;PTGS2
PPARG human	4 of 66	3.49122e-05	0.000289772	24.6675	253.154	CDKN1A;NR1H3;PTGS2;ICAM1
CEBPA mouse	3 of 24	4.03625e-05	0.000324202	53.7008	543.324	NOS2;NR1H3;PTGS2
HDAC1 human	4 of 71	4.65808e-05	0.000359709	22.8209	227.623	CDKN1A;PTGS2;CD44;ICAM1
SP1 human	8 of 472	4.76723e-05	0.000359709	6.99713	69.6295	CDKN1A;IL6;CCL2;PTGS2;SOD2;CD44;ICAM1;TLR2
RARA human	3 of 26	5.16437e-05	0.000378214	49.0263	483.945	HCK;CDKN1A;ICAM1
REL mouse	3 of 28	6.48133e-05	0.000461101	45.0996	434.941	NOS2;CCL2;SOD2
HIF1A human	4 of 83	8.59301e-05	0.000578287	19.3427	181.086	GAPDH;HIF1A;ASS1;TLR2
SP3 mouse	4 of 83	8.59301e-05	0.000578287	19.3427	181.086	SOCS3;CDKN1A;IL6;PTGS2
TRP53 mouse	5 of 167	0.000103507	0.000678243	11.9717	109.851	CDKN1A;FPR1;UPP1;PTGS2;SOD2
EGR1 human	4 of 88	0.000107918	0.000689015	18.1868	166.121	CDKN1A;IL6;PTGS2;HIF1A
FOXO4 human	2 of 6	0.000114672	0.000696423	184.63	1675.22	SOD2;HIF1A
IKBKB human	2 of 6	0.000114672	0.000696423	184.63	1675.22	NOS2;CD44
ATF4 human	3 of 35	0.000127703	0.000757094	35.2217	315.791	IL6;CCL2;PTGS2
MYC human	4 of 100	0.000177012	0.00102502	15.9038	137.398	CDKN1A;IL6;CD38;ASS1
KLF4 human	3 of 40	0.000190872	0.00108016	30.4544	260.808	IFITM3;CDKN1A;IL6
ZFP36 human	2 of 8	0.000213286	0.00118018	123.074	1040.33	IL6;HIF1A
EGR2 human	2 of 9	0.000273732	0.00141999	105.487	865.346	IL6;PTGS2
HIPK2 human	2 of 9	0.000273732	0.00141999	105.487	865.346	CDKN1A;HIF1A
SMARCA4 human	2 of 9	0.000273732	0.00141999	105.487	865.346	CDKN1A;CD44
ABL1 human	2 of 10	0.000341551	0.00173564	92.2963	736.71	CDKN1A;PIM1
NCOA1 mouse	2 of 11	0.000416702	0.00203448	82.037	638.506	NFKBIA;CDKN1A
STAT4 human	2 of 11	0.000416702	0.00203448	82.037	638.506	SOCS3;PIM1
APC human	2 of 12	0.000499144	0.00239013	73.8296	561.298	NOS2;PTGS2
EP300 human	3 of 56	0.000518815	0.00239232	21.2435	160.685	CDKN1A;IL6;PTGS2
FOS mouse	3 of 56	0.000518815	0.00239232	21.2435	160.685	SOCS3;IL6;NOS2
ATF4 mouse	2 of 13	0.000588838	0.00257229	67.1145	499.154	CDKN1A;IL6
FLI1 mouse	2 of 13	0.000588838	0.00257229	67.1145	499.154	CCL2;UPP1
HDAC7 human	2 of 13	0.000588838	0.00257229	67.1145	499.154	CDKN1A;HIF1A
CEBPB human	3 of 60	0.000635421	0.00272793	19.7488	145.375	CDKN1A;IL6;PTGS2
TBP human	2 of 15	0.000789823	0.00317203	56.7835	405.644	CDKN1A;IL6
ING4 human	2 of 15	0.000789823	0.00317203	56.7835	405.644	CDKN1A;PTGS2
IRF3 human	2 of 15	0.000789823	0.00317203	56.7835	405.644	CXCL10;CCL2
JUNB human	2 of 15	0.000789823	0.00317203	56.7835	405.644	CDKN1A;PTGS2
CEBPD human	2 of 17	0.00101934	0.00390486	49.2074	338.97	PTGS2;GAPDH
HMGA1 human	2 of 17	0.00101934	0.00390486	49.2074	338.97	PTGS2;CD44
MYB mouse	2 of 17	0.00101934	0.00390486	49.2074	338.97	CDKN1A;PTGS2
TFAP2A human	3 of 71	0.00103846	0.00391781	16.545	113.664	CDKN1A;PTGS2;SOD2
TCF4 mouse	2 of 19	0.00127708	0.00447876	43.4139	289.275	PTGS2;CD44
KLF4 mouse	2 of 19	0.00127708	0.00447876	43.4139	289.275	NOS2;PTGS2
NFKBIA human	2 of 19	0.00127708	0.00447876	43.4139	289.275	NOS2;ICAM1
NR3C1 mouse	2 of 19	0.00127708	0.00447876	43.4139	289.275	NFKBIA;PTGS2
PML human	2 of 19	0.00127708	0.00447876	43.4139	289.275	HCK;CDKN1A
KLF6 human	2 of 20	0.00141643	0.00489848	41	268.944	CDKN1A;NOS2
CTNNB1 human	2 of 22	0.00171591	0.00585289	36.8963	234.949	PTGS2;CD44
FOXM1 mouse	2 of 23	0.00187596	0.00631234	35.1376	220.616	SOCS3;PTGS2
HDAC4 human	2 of 24	0.00204283	0.00678219	33.5387	207.719	CDKN1A;PTGS2
TWIST2 human	2 of 25	0.00221649	0.0071676	32.0789	196.061	CD44;ICAM1
CREBBP human	2 of 25	0.00221649	0.0071676	32.0789	196.061	CDKN1A;PTGS2
ERG human	2 of 27	0.00258401	0.00814452	29.5096	175.831	PIM1;ICAM1
HDAC2 human	2 of 27	0.00258401	0.00814452	29.5096	175.831	CDKN1A;CCL2
ATF2 human	2 of 32	0.0036189	0.0108567	24.5852	138.208	CDKN1A;PTGS2
CDX2 human	2 of 32	0.0036189	0.0108567	24.5852	138.208	CDKN1A;PTGS2
ETS2 human	2 of 32	0.0036189	0.0108567	24.5852	138.208	CDKN1A;ICAM1
LEF1 mouse	2 of 32	0.0036189	0.0108567	24.5852	138.208	CCL7;PTGS2
TWIST1 human	2 of 35	0.00431796	0.0127997	22.3468	121.678	CD44;ICAM1
CREBBP mouse	2 of 41	0.00588725	0.0172462	18.9031	97.067	SOCS3;IL6
VDR human	2 of 42	0.00617057	0.0178659	18.4296	93.7693	CDKN1A;IL6
MYCN human	2 of 45	0.00705713	0.020198	17.1413	84.9129	CDKN1A;CD44
USF2 human	2 of 47	0.00767833	0.0217262	16.3778	79.7492	PTGS2;HIF1A
E2F1 mouse	2 of 49	0.00832333	0.0230279	15.6793	75.0832	CDKN1A;NOS2
FOXO1 mouse	2 of 49	0.00832333	0.0230279	15.6793	75.0832	CDKN1A;CCL2
PPARG mouse	2 of 50	0.00865467	0.0236815	15.3519	72.916	PTGS2;SOD2
IRF1 human	2 of 51	0.00899185	0.0243366	15.0378	70.8496	CXCL10;CDKN1A
BRCA1 human	2 of 57	0.0111359	0.0294982	13.3933	60.2374	CDKN1A;HIF1A
FOS human	2 of 57	0.0111359	0.0294982	13.3933	60.2374	NOS2;PTGS2
ETS1 mouse	2 of 59	0.0118958	0.0311794	12.922	57.2649	CCL2;PTGS2
CTNNB1 mouse	2 of 62	0.0130771	0.0335691	12.2741	53.2313	CCL7;PTGS2
SPI1 human	2 of 62	0.0130771	0.0335691	12.2741	53.2313	HCK;CCL2
AATF mouse	1 of 6	0.0166848	0.0384677	72.5055	296.784	CDKN1A
TCF21 mouse	1 of 6	0.0166848	0.0384677	72.5055	296.784	CDKN1A
TWIST2 mouse	1 of 6	0.0166848	0.0384677	72.5055	296.784	CDKN1A
ZFP148 mouse	1 of 6	0.0166848	0.0384677	72.5055	296.784	CDKN1A
EHMT2 mouse	1 of 6	0.0166848	0.0384677	72.5055	296.784	CDKN1A
ETV5 mouse	1 of 6	0.0166848	0.0384677	72.5055	296.784	PTGS2
GFI1 human	1 of 6	0.0166848	0.0384677	72.5055	296.784	CDKN1A
GTF2IRD1 mouse	1 of 6	0.0166848	0.0384677	72.5055	296.784	CCL7
NFKB2 human	1 of 6	0.0166848	0.0384677	72.5055	296.784	HIF1A
SOX6 human	1 of 6	0.0166848	0.0384677	72.5055	296.784	CDKN1A
SPDEF mouse	1 of 6	0.0166848	0.0384677	72.5055	296.784	CDKN1A
EGR1 mouse	2 of 71	0.0169119	0.0386335	10.6683	43.5238	CCL2;ICAM1
APEX1 human	1 of 7	0.0194389	0.0403357	60.4182	238.077	CCL2
TFAP4 human	1 of 7	0.0194389	0.0403357	60.4182	238.077	CDKN1A
ELK1 mouse	1 of 7	0.0194389	0.0403357	60.4182	238.077	IL6
HDAC3 mouse	1 of 7	0.0194389	0.0403357	60.4182	238.077	NFKBIA
HNF1B mouse	1 of 7	0.0194389	0.0403357	60.4182	238.077	SOCS3
HSF2 human	1 of 7	0.0194389	0.0403357	60.4182	238.077	HIF1A
ING1 human	1 of 7	0.0194389	0.0403357	60.4182	238.077	CDKN1A
KLF10 human	1 of 7	0.0194389	0.0403357	60.4182	238.077	CDKN1A
NFATC1 human	1 of 7	0.0194389	0.0403357	60.4182	238.077	ICAM1
SIN3A mouse	1 of 7	0.0194389	0.0403357	60.4182	238.077	NOS2
STAT4 mouse	1 of 7	0.0194389	0.0403357	60.4182	238.077	NOS2
APEX1 mouse	1 of 8	0.0221854	0.0418497	51.7844	197.212	PTGS2
ATF3 mouse	1 of 8	0.0221854	0.0418497	51.7844	197.212	IL6
BRCA1 mouse	1 of 8	0.0221854	0.0418497	51.7844	197.212	CDKN1A
CDX1 human	1 of 8	0.0221854	0.0418497	51.7844	197.212	PTGS2
ERCC2 human	1 of 8	0.0221854	0.0418497	51.7844	197.212	CDKN1A
FOXG1 mouse	1 of 8	0.0221854	0.0418497	51.7844	197.212	CDKN1A
IRF9 human	1 of 8	0.0221854	0.0418497	51.7844	197.212	CDKN1A
MTA1 mouse	1 of 8	0.0221854	0.0418497	51.7844	197.212	CDKN1A
MYF6 mouse	1 of 8	0.0221854	0.0418497	51.7844	197.212	CDKN1A
NR0B2 human	1 of 8	0.0221854	0.0418497	51.7844	197.212	PTGS2
POU4F1 mouse	1 of 8	0.0221854	0.0418497	51.7844	197.212	CDKN1A
SMAD7 mouse	1 of 8	0.0221854	0.0418497	51.7844	197.212	NFKBIA
TBX2 mouse	1 of 9	0.0249244	0.0446487	45.3091	167.277	CDKN1A
DNMT3A human	1 of 9	0.0249244	0.0446487	45.3091	167.277	CDKN1A
ELF3 human	1 of 9	0.0249244	0.0446487	45.3091	167.277	PTGS2
FOXO3 mouse	1 of 9	0.0249244	0.0446487	45.3091	167.277	SOCS3
GFI1B mouse	1 of 9	0.0249244	0.0446487	45.3091	167.277	SOCS3
NCOA3 mouse	1 of 9	0.0249244	0.0446487	45.3091	167.277	NFKBIA
SMAD7 human	1 of 9	0.0249244	0.0446487	45.3091	167.277	CDKN1A
CREB1 human	2 of 90	0.0263526	0.0462167	8.3569	30.3873	IL6;PTGS2
YY1 human	2 of 91	0.0268972	0.0462167	8.26259	29.8753	NOS2;HIF1A
TBX3 mouse	1 of 10	0.0276558	0.0462167	40.2727	144.495	CDKN1A
TFAP2C human	1 of 10	0.0276558	0.0462167	40.2727	144.495	CDKN1A
TRP63 mouse	1 of 10	0.0276558	0.0462167	40.2727	144.495	CDKN1A
GFI1 mouse	1 of 10	0.0276558	0.0462167	40.2727	144.495	CDKN1A
MYF5 mouse	1 of 10	0.0276558	0.0462167	40.2727	144.495	CDKN1A
NFIL3 human	1 of 10	0.0276558	0.0462167	40.2727	144.495	PTGS2
NFIL3 mouse	1 of 10	0.0276558	0.0462167	40.2727	144.495	PTGS2
NFKB2 mouse	1 of 10	0.0276558	0.0462167	40.2727	144.495	HIF1A
TFAP2C mouse	1 of 11	0.0303797	0.0478769	36.2436	126.635	CDKN1A
FOXP3 human	1 of 11	0.0303797	0.0478769	36.2436	126.635	CDKN1A
ID1 mouse	1 of 11	0.0303797	0.0478769	36.2436	126.635	CDKN1A
KLF2 human	1 of 11	0.0303797	0.0478769	36.2436	126.635	CDKN1A
KLF5 mouse	1 of 11	0.0303797	0.0478769	36.2436	126.635	NOS2
NFIC mouse	1 of 11	0.0303797	0.0478769	36.2436	126.635	CCL2
NPM1 human	1 of 11	0.0303797	0.0478769	36.2436	126.635	CDKN1A
PARP1 mouse	1 of 11	0.0303797	0.0478769	36.2436	126.635	NOS2
SP4 human	1 of 11	0.0303797	0.0478769	36.2436	126.635	ASS1
TCF7L2 human	1 of 12	0.0330961	0.0499451	32.9471	112.295	PTGS2
BMI1 mouse	1 of 12	0.0330961	0.0499451	32.9471	112.295	CDKN1A
IRF7 human	1 of 12	0.0330961	0.0499451	32.9471	112.295	CXCL10
NR1I2 mouse	1 of 12	0.0330961	0.0499451	32.9471	112.295	CDKN1A
NR4A2 mouse	1 of 12	0.0330961	0.0499451	32.9471	112.295	GCH1
OTX2 human	1 of 12	0.0330961	0.0499451	32.9471	112.295	IL6
SREBF2 mouse	1 of 12	0.0330961	0.0499451	32.9471	112.295	CDKN1A
TP73 human	1 of 13	0.0358051	0.0524439	30.2	100.556	CDKN1A
CUX1 mouse	1 of 13	0.0358051	0.0524439	30.2	100.556	CDKN1A
E2F3 human	1 of 13	0.0358051	0.0524439	30.2	100.556	CDKN1A
KAT2B human	1 of 13	0.0358051	0.0524439	30.2	100.556	CDKN1A
KLF5 human	1 of 13	0.0358051	0.0524439	30.2	100.556	HIF1A
TCF3 human	1 of 14	0.0385066	0.0551042	27.8755	90.7885	CDKN1A
MYOG mouse	1 of 14	0.0385066	0.0551042	27.8755	90.7885	CDKN1A
PGR mouse	1 of 14	0.0385066	0.0551042	27.8755	90.7885	NFKBIA
SNAI2 human	1 of 14	0.0385066	0.0551042	27.8755	90.7885	CD44
SP3 human	2 of 113	0.0399794	0.056885	6.61762	21.3047	SOCS3;CDKN1A
TP63 human	1 of 15	0.0412006	0.0573126	25.8831	82.5491	CDKN1A
BCL3 mouse	1 of 15	0.0412006	0.0573126	25.8831	82.5491	CXCL10
ETV4 mouse	1 of 15	0.0412006	0.0573126	25.8831	82.5491	PTGS2
FOSL2 human	1 of 15	0.0412006	0.0573126	25.8831	82.5491	NOS2
GTF2I mouse	1 of 16	0.0438873	0.0600436	24.1564	75.516	CCL7
IKZF1 mouse	1 of 16	0.0438873	0.0600436	24.1564	75.516	NOS2
NFE2L2 human	1 of 16	0.0438873	0.0600436	24.1564	75.516	SOD2
BCL6 human	1 of 17	0.0465665	0.0630167	22.6455	69.4507	CDKN1A
POU2F2 mouse	1 of 17	0.0465665	0.0630167	22.6455	69.4507	NOS2
BCL6 mouse	1 of 18	0.0492384	0.0655634	21.3123	64.1731	CDKN1A
DDIT3 human	1 of 18	0.0492384	0.0655634	21.3123	64.1731	IL6
RBPJ mouse	1 of 18	0.0492384	0.0655634	21.3123	64.1731	CDKN1A
TRP73 mouse	1 of 19	0.0519029	0.067664	20.1273	59.5441	CDKN1A
ESR2 human	1 of 19	0.0519029	0.067664	20.1273	59.5441	CDKN1A
NR0B2 mouse	1 of 19	0.0519029	0.067664	20.1273	59.5441	CDKN1A
SMAD2 mouse	1 of 19	0.0519029	0.067664	20.1273	59.5441	CDKN1A
E2F1 human	2 of 134	0.0542565	0.0693136	5.55892	16.1989	CDKN1A;CCL3
ARNT human	1 of 20	0.0545601	0.0693136	19.067	55.4554	HIF1A
VHL human	1 of 20	0.0545601	0.0693136	19.067	55.4554	HIF1A
POU2F1 mouse	1 of 20	0.0545601	0.0693136	19.067	55.4554	NOS2
RB1 mouse	1 of 20	0.0545601	0.0693136	19.067	55.4554	CDKN1A
HIF1A mouse	1 of 21	0.05721	0.0719459	18.1127	51.821	PTGS2
PAX5 human	1 of 21	0.05721	0.0719459	18.1127	51.821	CDKN1A
AHR human	1 of 22	0.0598526	0.0741457	17.2494	48.5719	IL6
ATM human	1 of 22	0.0598526	0.0741457	17.2494	48.5719	CDKN1A
ETV4 human	1 of 22	0.0598526	0.0741457	17.2494	48.5719	PTGS2
IRF8 mouse	1 of 23	0.0624879	0.076272	16.4645	45.6524	NOS2
NOTCH1 mouse	1 of 23	0.0624879	0.076272	16.4645	45.6524	CDKN1A
SOX9 human	1 of 23	0.0624879	0.076272	16.4645	45.6524	CDKN1A
FOXO1 human	1 of 24	0.0651159	0.0779513	15.7478	43.0165	IL6
MTA1 human	1 of 24	0.0651159	0.0779513	15.7478	43.0165	NOS2
POU5F1 human	1 of 24	0.0651159	0.0779513	15.7478	43.0165	CDKN1A
SMAD1 mouse	1 of 24	0.0651159	0.0779513	15.7478	43.0165	CDKN1A
TCF4 human	1 of 25	0.0677367	0.0791852	15.0909	40.6266	CD44
CREM human	1 of 25	0.0677367	0.0791852	15.0909	40.6266	CCL4
PARP1 human	1 of 25	0.0677367	0.0791852	15.0909	40.6266	CDKN1A
PGR human	1 of 25	0.0677367	0.0791852	15.0909	40.6266	PTGS2
STAT5A mouse	1 of 25	0.0677367	0.0791852	15.0909	40.6266	SOCS3
ETS2 mouse	1 of 26	0.0703503	0.0803543	14.4865	38.4512	NOS2
MITF human	1 of 26	0.0703503	0.0803543	14.4865	38.4512	HIF1A
NR1I2 human	1 of 26	0.0703503	0.0803543	14.4865	38.4512	CCL2
SIRT1 mouse	1 of 26	0.0703503	0.0803543	14.4865	38.4512	IL6
SMAD4 human	1 of 26	0.0703503	0.0803543	14.4865	38.4512	CDKN1A
NFIC human	1 of 27	0.0729567	0.0825738	13.9287	36.4637	CCL2
POU5F1 mouse	1 of 27	0.0729567	0.0825738	13.9287	36.4637	CDKN1A
MITF mouse	1 of 28	0.075556	0.0851287	13.4121	34.6419	CDKN1A
TWIST1 mouse	1 of 29	0.078148	0.0861012	12.9325	32.9668	CDKN1A
ESR1 mouse	1 of 29	0.078148	0.0861012	12.9325	32.9668	CDKN1A
LEF1 human	1 of 29	0.078148	0.0861012	12.9325	32.9668	CCL7
SNAI1 mouse	1 of 29	0.078148	0.0861012	12.9325	32.9668	PTGS2
SOX9 mouse	1 of 29	0.078148	0.0861012	12.9325	32.9668	CDKN1A
RUNX3 human	1 of 30	0.080733	0.0885573	12.4859	31.4221	CDKN1A
CREB1 mouse	1 of 31	0.0833108	0.0898025	12.0691	29.9938	PTGS2
HSF1 human	1 of 31	0.0833108	0.0898025	12.0691	29.9938	CDKN1A
RB1 human	1 of 31	0.0833108	0.0898025	12.0691	29.9938	CDKN1A
SMAD3 human	1 of 31	0.0833108	0.0898025	12.0691	29.9938	CDKN1A
SREBF1 mouse	1 of 36	0.0960937	0.102692	10.3423	24.2262	CDKN1A
STAT6 human	1 of 36	0.0960937	0.102692	10.3423	24.2262	PTGS2
MYB human	1 of 37	0.0986292	0.104952	10.0545	23.2902	ICAM1
NR3C1 human	1 of 38	0.101158	0.107184	9.78231	22.412	CDKN1A
EZH2 human	1 of 40	0.106194	0.111102	9.27972	20.8097	CDKN1A
RUNX1 human	1 of 40	0.106194	0.111102	9.27972	20.8097	CCL3
SMAD4 mouse	1 of 40	0.106194	0.111102	9.27972	20.8097	CDKN1A
TCF3 mouse	1 of 44	0.116183	0.121044	8.4148	18.1136	CDKN1A
HNF4A human	1 of 45	0.118663	0.123113	8.22314	17.5273	CDKN1A
MYC mouse	1 of 49	0.128516	0.132233	7.53636	15.4624	CDKN1A
SMAD3 mouse	1 of 49	0.128516	0.132233	7.53636	15.4624	CCL2
MYOD1 mouse	1 of 50	0.130962	0.134195	7.38219	15.0069	CDKN1A
NFE2L2 mouse	1 of 53	0.13826	0.141093	6.95524	13.7618	SOD2
WT1 human	1 of 57	0.147897	0.150312	6.45714	12.3411	CDKN1A
USF1 human	1 of 65	0.166855	0.16889	5.64773	10.113	PTGS2
ESR1 human	1 of 76	0.192247	0.193804	4.81673	7.94266	CDKN1A
ETS1 human	1 of 79	0.199039	0.199842	4.63077	7.47523	CDKN1A
TP53 human	1 of 164	0.369808	0.369808	2.20647	2.19494	CDKN1A

## Sheet: Table 4 Pool IFN I&II gene sets
Type I Interferon Gene Sets								Type II Interferon Gene Sets
Reactome IFN alpha beta signaling	ToppFUnn Type I IFN signaling	ToppFun Type I Response	Hallmark IFN alpha response v7.5.1		Pool All IFN alpha lists	Pool IFN alpha lists No Duplicates		Reactome IFN gamma signaling	ToppFun Response to IFN gamma	ToppFunn IFN Signaling List	Hallmark IFN gamma response v7.5.1		Pool All IFN gamma lists	Pool IFN gamma lists No Duplicates		Pool IFN alpha gamma no dup lists	Mega pool Type I and II no duplicates		Nanostring WTA LIST				Pool IFN I&II gene sets used to filter UnCorrected vs Corrected DEGs.		Nanostring WTA LIST
https://reactome.org/PathwayBrowser/#/R-HSA-909733	https://www.ebi.ac.uk/QuickGO/search/GO:0034341	https://www.ebi.ac.uk/QuickGO/search/GO:0034340	https://www.gsea-msigdb.org/gsea/msigdb/cards/HALLMARK_INTERFERON_ALPHA_RESPONSE.html					https://reactome.org/PathwayBrowser/#/R-HSA-877300	https://www.ebi.ac.uk/QuickGO/term/GO:0034341	https://toppgene.cchmc.org/enrichment.jsp	https://www.gsea-msigdb.org/gsea/msigdb/cards/HALLMARK_INTERFERON_GAMMA_RESPONSE.html								TargetName		Mega pool Type I and II no duplicates		Mega pool shared with WTA list		TargetName
ABCE1	MYD88	MYD88	ADAR		ABCE1	ABCE1		B2M	CALCOCO2	TPR	ADAR		B2M	B2M		ABCE1	ABCE1		Il23r		ABCE1		ABCE1		Sp100
ADAR	USP18	USP18	B2M		ADAR	ADAR		CAMK2A	MYC	SEH1L	APOL6		CAMK2A	CAMK2A		ADAR	ADAR		Auts2		ADAR		ADAR		Parp14
BST2	TREX1	TREX1	BATF2		BST2	BST2		CAMK2B	LGALS9C	NUP50	ARID5B		CAMK2B	CAMK2B		BST2	BST2		Znfx1		BST2		BST2		Ifnb1
EGR1	SP100	SP100	BST2		EGR1	EGR1		CAMK2D	CFH	USP18	ARL4A		CAMK2D	CAMK2D		EGR1	EGR1		Gapdh		EGR1		EGR1		Sp110
GBP2	METTL3	METTL3	C1S		GBP2	GBP2		CAMK2G	IL12B	SP100	AUTS2		CAMK2G	CAMK2G		GBP2	GBP2		Il18bp		GBP2		GBP2		Ifitm1
HLA-A	UBE2K	UBE2K	CASP1		HLA-A	HLA-A		CD44	EPRS1	GBP6	B2M		CD44	CD44		HLA-A	HLA-A		Rab11fip5		IFI27		IFI27		Uba7
HLA-B	HLA-A	HLA-A	CASP8		HLA-B	HLA-B		CIITA	IL12RB1	TRIM25	BANK1		CIITA	CIITA		HLA-B	HLA-B		Il18		IFI35		IFI35		Cxcl11
HLA-C	HLA-B	HLA-B	CCRL2		HLA-C	HLA-C		FCGR1A	SERPINA3	UBE2L6	BATF2		FCGR1A	FCGR1A		HLA-C	HLA-C		Rpl13a		IFIT1		IFIT1		Ly6e
HLA-E	DDX58	DDX58	CD47		HLA-E	HLA-E		FCGR1B	IRGM	NUP85	BPGM		FCGR1B	FCGR1B		HLA-E	HLA-E		Mid1		IFIT2		IFIT2		Cxcl10
HLA-F	HLA-C	HLA-C	CD74		HLA-F	HLA-F		GBP1	SP100	HLA-A	BST2		GBP1	GBP1		HLA-F	HLA-F		Ccl26		IFIT3		IFIT3		Irf8
HLA-G	WNT5A	SHFL	CMPK2		HLA-G	HLA-G		GBP2	GBP6	HLA-B	BTG1		GBP2	GBP2		HLA-G	HLA-G		Isoc1		IFITM1		IFITM1		Isg15
HLA-H	HLA-E	WNT5A	CMTR1		HLA-H	HLA-H		GBP3	IL18	DDX58	C1R		GBP3	GBP3		HLA-H	HLA-H		Pias1		IFITM2		IFITM2		Stat2
IFI27	HLA-F	HLA-E	CNP		IFI27	IFI27		GBP4	TRIM25	HLA-C	C1S		GBP4	GBP4		IFI27	IFI27		Trim62		IFITM3		IFITM3		Ddx60
IFI35	HLA-G	HLA-F	CSF1		IFI35	IFI35		GBP5	CDC42EP4	GBP7	CASP1		GBP5	GBP5		IFI35	IFI35		Arl4a		IFNA1		IFNA1		Socs3
IFI6	HLA-H	HLA-G	CXCL10		IFI6	IFI6		GBP6	HLA-A	HLA-DPA1	CASP3		GBP6	GBP6		IFI6	IFI6		Nup50		IFNA13		IFNA13		Dhx58
IFIT1	PSMB8	HLA-H	CXCL11		IFIT1	IFIT1		GBP7	MYO1C	HLA-DPB1	CASP4		GBP7	GBP7		IFIT1	IFIT1		Tnfsf10		IFNA2		IFNA2		Ifitm3
IFIT2	IRF8	PSMB8	DDX60		IFIT2	IFIT2		HLA-A	HLA-B	HLA-DQA1	CASP7		HLA-A	HLA-A		IFIT2	IFIT2		Cd40		IFNA4		IFNA4		Ifi44l
IFIT3	FADD	IRF8	DHX58		IFIT3	IFIT3		HLA-B	DDX58	HLA-DQA2	CASP8		HLA-B	HLA-B		IFIT3	IFIT3		Tlr4		IFNA6		IFNA6		Irf9
IFITM1	IRAK1	FADD	EIF2AK2		IFITM1	IFITM1		HLA-C	HLA-C	TRIM26	CCL2		HLA-C	HLA-C		IFITM1	IFITM1		Flnb		IFNAR1		IFNAR1		Wnt5a
IFITM2	IFITM1	IRAK1	ELF1		IFITM2	IFITM2		HLA-DPA1	GBP7	HLA-DQB1	CCL5		HLA-DPA1	HLA-DPA1		IFITM2	IFITM2		Ranbp2		IFNAR2		IFNAR2		Ip6k2
IFITM3	GBP2	IFITM1	EPSTI1		IFITM3	IFITM3		HLA-DPB1	GAPDH	EIF4A3	CCL7		HLA-DPB1	HLA-DPB1		IFITM3	IFITM3		Stat3		IFNB1		IFNB1		Myd88
IFNA1	OAS1	SHMT2	GBP2		IFNA1	IFNA1		HLA-DQA1	LGALS9B	TRIM35	CD274		HLA-DQA1	HLA-DQA1		IFNA1	IFNA1		Il12rb1		IP6K2		IP6K2		Ogfr
IFNA10	IRF1	GBP2	GBP4		IFNA10	IFNA10		HLA-DQA2	HLA-DPA1	HLA-DQB2	CD38		HLA-DQA2	HLA-DQA2		IFNA10	IFNA10		Ubb		IRF1		IRF1		Irf4
IFNA13	OAS2	OAS1	GMPR		IFNA13	IFNA13		HLA-DQB1	SHFL	HLA-DRA	CD40		HLA-DQB1	HLA-DQB1		IFNA13	IFNA13		Aqp4		IRF2		IRF2		Cd47
IFNA14	IRF2	IRF1	HELZ2		IFNA14	IFNA14		HLA-DQB2	HLA-DPB1	HLA-DRB1	CD69		HLA-DQB2	HLA-DQB2		IFNA14	IFNA14		Trim29		IRF3		IRF3		Ifnar1
IFNA16	OAS3	OAS2	HERC6		IFNA16	IFNA16		HLA-DRA	HLA-DQA1	HLA-DRB3	CD74		HLA-DRA	HLA-DRA		IFNA16	IFNA16		Slc30a8		IRF4		IRF4		Ptpn6
IFNA17	IRF3	IRF2	HLA-C		IFNA17	IFNA17		HLA-DRB1	HLA-DQA2	HLA-DRB4	CD86		HLA-DRB1	HLA-DRB1		IFNA17	IFNA17		Stxbp2		IRF5		IRF5		Ifitm2
IFNA2	IRF4	OAS3	IFI27		IFNA2	IFNA2		HLA-DRB3	TRIM26	B2M	CDKN1A		HLA-DRB3	HLA-DRB3		IFNA2	IFNA2		Gbp7		IRF6		IRF6		Rtp4
IFNA21	IRF5	IRF3	IFI30		IFNA21	IFNA21		HLA-DRB4	HLA-DQB1	HLA-DRB5	CFB		HLA-DRB4	HLA-DRB4		IFNA21	IFNA21		Pom121		IRF7		IRF7		Tap1
IFNA4	IRF6	IRF4	IFI35		IFNA4	IFNA4		HLA-DRB5	HLA-DQB2	HLA-E	CFH		HLA-DRB5	HLA-DRB5		IFNA4	IFNA4		Itgb7		IRF8		IRF8		Ifit2
IFNA5	IRF7	IRF5	IFI44		IFNA5	IFNA5		HLA-E	CYP11B1	HLA-F	CIITA		HLA-E	HLA-E		IFNA5	IFNA5		Il2rb		IRF9		IRF9		Oas2
IFNA6	SAMHD1	IRF6	IFI44L		IFNA6	IFNA6		HLA-F	CYP11B2	HLA-G	CMKLR1		HLA-F	HLA-F		IFNA6	IFNA6		Selp		ISG15		ISG15		Cdc37
IFNA7	ISG20	IRF7	IFIH1		IFNA7	IFNA7		HLA-G	HLA-DRA	HLA-H	CMPK2		HLA-G	HLA-G		IFNA7	IFNA7		Gch1		ISG20		ISG20		Ifit3
IFNA8	IFITM2	SAMHD1	IFIT2		IFNA8	IFNA8		HLA-H	HLA-DRB1	PSMB8	CMTR1		HLA-H	HLA-H		IFNA8	IFNA8		Slc11a1		JAK1		JAK1		Rnasel
IFNAR1	CAV1	ISG20	IFIT3		IFNAR1	IFNAR1		ICAM1	STXBP4	GBP1	CSF2RB		ICAM1	ICAM1		IFNAR1	IFNAR1		Camk2a		MX1		MX1		Psme1
IFNAR2	TRIM6	IFITM2	IFITM1		IFNAR2	IFNAR2		IFI30	HLA-DRB3	GBP2	CXCL10		IFI30	IFI30		IFNAR2	IFNAR2		Casp7		MX2		MX2		Isg20
IFNB1	IFI27	CAV1	IFITM2		IFNB1	IFNB1		IFNG	HLA-DRB4	GBP3	CXCL11		IFNG	IFNG		IFNB1	IFNB1		Rae1		OAS2		OAS2		Psmb9
IP6K2	DCST1	TRIM6	IFITM3		IP6K2	IP6K2		IFNGR1	RPS6KB1	IRF1	CXCL9		IFNGR1	IFNGR1		IP6K2	IP6K2		Ifngr2		OAS3		OAS3		Egr1
IRF1	IFI35	IFI27	IL15		IRF1	IRF1		IFNGR2	B2M	IRF2	DDX58		IFNGR2	IFNGR2		IRF1	IRF1		Trim45		PSMB8		PSMB8		Tyk2
IRF2	ADAR	DCST1	IL4R		IRF2	IRF2		IRF1	HLA-DRB5	NCAM1	DDX60		IRF1	IRF1		IRF2	IRF2		Nup205		PTPN11		PTPN11		Ptpn2
IRF3	IFIT2	IFI35	IL7		IRF3	IRF3		IRF2	PECAM1	IRF3	DHX58		IRF2	IRF2		IRF3	IRF3		Nup214		PTPN6		PTPN6		Irf3
IRF4	IFIT1	ADAR	IRF1		IRF4	IRF4		IRF3	CYP27B1	IRF4	EIF2AK2		IRF3	IRF3		IRF4	IRF4		Pde4b		RNASEL		RNASEL		Stat1
IRF5	IFIT3	IFIT2	IRF2		IRF5	IRF5		IRF4	HLA-E	IRF5	EIF4E3		IRF4	IRF4		IRF5	IRF5		Cfb		RSAD2		RSAD2		Bst2
IRF6	IFNA1	IFIT1	IRF7		IRF6	IRF6		IRF5	HLA-F	IRF6	EPSTI1		IRF5	IRF5		IRF6	IRF6		Ube2e1		SAMHD1		SAMHD1		Ptpn11
IRF7	IFNA2	IFIT3	IRF9		IRF7	IRF7		IRF6	HLA-G	TRIM34	FAS		IRF6	IRF6		IRF7	IRF7		Actg1		SOCS1		SOCS1		Ifit1
IRF8	IFNA4	IFNA1	ISG15		IRF8	IRF8		IRF7	HLA-H	IRF7	FCGR1A		IRF7	IRF7		IRF8	IRF8		P2ry14		SOCS3		SOCS3		Gbp2
IRF9	IFNA5	IFNA2	ISG20		IRF9	IRF9		IRF8	SLC30A8	TRIM21	FGL2		IRF8	IRF8		IRF9	IRF9		Nup160		STAT1		STAT1		Epsti1
ISG15	IFNA6	IFNA4	LAMP3		ISG15	ISG15		IRF9	ACTG1	NUP62	FPR1		IRF9	IRF9		ISG15	ISG15		Dnaja3		STAT2		STAT2		Txnip
ISG20	IFNA7	IFNA5	LAP3		ISG20	ISG20		JAK1	GBP1	ISG20	GBP4		JAK1	JAK1		ISG20	ISG20		Nup85		TYK2		TYK2		Adar
JAK1	STAT1	IFNA6	LGALS3BP		JAK1	JAK1		JAK2	GBP2	RPS27A	GBP6		JAK2	JAK2		JAK1	JAK1		Eif4a3		XAF1		XAF1		Irf2
MX1	IFNA8	IFNA7	LPAR6		MX1	MX1		MID1	HMGB1	NUP58	GCH1		MID1	MID1		MX1	MX1		Cd69		USP18		USP18		Ifna6
MX2	STAT2	STAT1	LY6E		MX2	MX2		MT2A	GBP3	PTAFR	GPR18		MT2A	MT2A		MX2	MX2		Plcg1		TREX1		TREX1		Cmpk2
OAS1	IFNA10	IFNA8	MOV10		OAS1	OAS1		NCAM1	IRF1	TRIM6	GZMA		NCAM1	NCAM1		OAS1	OAS1		Kpnb1		SP100		SP100		Rsad2
OAS2	IFNA13	STAT2	MVB12A		OAS2	OAS2		OAS1	DAPK1	TRIM29	HELZ2		OAS1	OAS1		OAS2	OAS2		Tpr		METTL3		METTL3		Nmi
OAS3	IFNA14	IFNA10	MX1		OAS3	OAS3		OAS2	IRF2	USP41	HERC6		OAS2	OAS2		OAS3	OAS3		Cd86		UBE2K		UBE2K		Rnf31
OASL	IFNA16	IFNA13	NCOA7		OASL	OASL		OAS3	NCAM1	TRIM14	HIF1A		OAS3	OAS3		OASL	OASL		Nup210		DDX58		DDX58		Jak1
PSMB8	IFNA17	IFNA14	NMI		PSMB8	PSMB8		OASL	DAPK3	ADAR	HLA-A		OASL	OASL		PSMB8	PSMB8		Vamp4		WNT5A		WNT5A		Psma3
PTPN11	IFNA21	IFNA16	NUB1		PTPN11	PTPN11		PML	IRF3	TRIM22	HLA-B		PML	PML		PTPN11	PTPN11		Ass1		FADD		FADD		Irf1
PTPN6	IFNAR1	IFNA17	OAS1		PTPN6	PTPN6		PRKCD	IRF4	STAT1	HLA-DMA		PRKCD	PRKCD		PTPN6	PTPN6		Ccl19		IRAK1		IRAK1		Ifnar2
RNASEL	IFNAR2	IFNA21	OASL		RNASEL	RNASEL		PTAFR	IRF5	STAT2	HLA-DQA1		PTAFR	PTAFR		RNASEL	RNASEL		Kpna1		CAV1		CAV1		Oas3
RSAD2	IFNB1	IFNAR1	OGFR		RSAD2	RSAD2		PTPN6	IRF6	NUP54	HLA-DRB1		PTPN6	PTPN6		RSAD2	RSAD2		Gbp5		TRIM6		TRIM6		Ptpn1
SAMHD1	TYK2	IFNAR2	PARP12		SAMHD1	SAMHD1		SOCS1	TRIM34	NUP205	HLA-G		SOCS1	SOCS1		SAMHD1	SAMHD1		Lysmd2		DCST1		DCST1		Lap3
SOCS1	TTLL12	IFNB1	PARP14		SOCS1	SOCS1		SOCS3	IRF7	NEDD4	ICAM1		SOCS3	SOCS3		SOCS1	SOCS1		Evl		TTLL12		TTLL12		Socs1
SOCS3	JAK1	TYK2	PARP9		SOCS3	SOCS3		SP100	TRIM21	TYK2	IDO1		SP100	SP100		SOCS3	SOCS3		Vim		CDC37		CDC37		Trim21
STAT1	CDC37	TTLL12	PLSCR1		STAT1	STAT1		STAT1	GCH1	JAK1	IFI27		STAT1	STAT1		STAT1	STAT1		Nos2		PIAS4		PIAS4		Samhd1
STAT2	PIAS4	JAK1	PNPT1		STAT2	STAT2		TRIM10	SIRPB1	JAK2	IFI30		TRIM10	TRIM10		STAT2	STAT2		Ptgs2		ZBP1		ZBP1		Trim26
TYK2	ZBP1	CDC37	PROCR		TYK2	TYK2		TRIM14	SIRPA	PTPN1	IFI35		TRIM14	TRIM14		TYK2	TYK2		Rps27a		PTPN1		PTPN1		Ddx58
XAF1	PTPN1	PIAS4	PSMA3		XAF1	XAF1		TRIM17	PTAFR	PTPN2	IFI44		TRIM17	TRIM17		XAF1	XAF1		Sri		PTPN2		PTPN2		Batf2
	PTPN2	ZBP1	PSMB8		USP18	USP18		TRIM2	CCL26	IRF9	IFI44L		TRIM2	TRIM2		USP18	USP18		Stxbp3		CACTIN		CACTIN		Tdrd7
	IRF9	PTPN1	PSMB9		TREX1	TREX1		TRIM21	TRIM22	UBA52	IFIH1		TRIM21	TRIM21		TREX1	TREX1		Mettl7b		MAVS		MAVS		Parp9
	CACTIN	PTPN2	PSME1		SP100	SP100		TRIM22	ZYX	KPNA7	IFIT1		TRIM22	TRIM22		SP100	SP100		Btg1		IKBKE		IKBKE		Trafd1
	PTPN6	IRF9	PSME2		METTL3	METTL3		TRIM25	MEFV	PTPN6	IFIT2		TRIM25	TRIM25		METTL3	METTL3		Ccl17		TBK1		TBK1		Mx1
	PTPN11	CACTIN	RIPK2		UBE2K	UBE2K		TRIM26	STAR	UBB	IFIT3		TRIM26	TRIM26		UBE2K	UBE2K		Ccl22		CNOT7		CNOT7		Ube2l6
	RSAD2	SETD2	RNF31		HLA-A	DDX58		TRIM29	STAT1	UBC	IFITM2		TRIM29	TRIM29		DDX58	DDX58		Syncrip		NLRC5		NLRC5		Ripk2
	RNASEL	PTPN6	RSAD2		HLA-B	WNT5A		TRIM3	VAMP3	PTPN11	IFITM3		TRIM3	TRIM3		WNT5A	WNT5A		Nup43		LSM14A		LSM14A		Helz2
	MAVS	PTPN11	RTP4		DDX58	FADD		TRIM31	CFHR4	UBA7	IFNAR2		TRIM31	TRIM31		FADD	FADD		Actr2		MMP12		MMP12		Casp1
	ISG15	RSAD2	SAMD9		HLA-C	IRAK1		TRIM34	TXK	POM121	IL10RA		TRIM34	TRIM34		IRAK1	IRAK1		Bank1		MUL1		MUL1		Usp18
	EGR1	RNASEL	SAMD9L		WNT5A	CAV1		TRIM35	CFHR3	UBE2E1	IL15		TRIM35	TRIM35		CAV1	CAV1		Myo1c		YTHDF2		YTHDF2		Lgals3bp
	IKBKE	MAVS	SELL		HLA-E	TRIM6		TRIM38	NOD2	GBP4	IL15RA		TRIM38	TRIM38		TRIM6	TRIM6		Ccl11		YTHDF3		YTHDF3		Parp12
	IFITM3	ISG15	SLC25A28		HLA-F	DCST1		TRIM45	SIRPG	FCGR1A	IL18BP		TRIM45	TRIM45		DCST1	DCST1		Pla2g4a		HSP90AB1		HSP90AB1		Psmb8
	ABCE1	EGR1	SP110		HLA-G	TTLL12		TRIM46	ACOD1	FCGR1BP	IL2RB		TRIM46	TRIM46		TTLL12	TTLL12		Nr1h2		MYD88		MYD88		Samd9l
	BST2	IKBKE	STAT2		HLA-H	CDC37		TRIM48	JAK1	GBP5	IL4R		TRIM48	TRIM48		CDC37	CDC37		Was		SHFL		SHFL		Ifi44
	TBK1	IFITM3	TAP1		PSMB8	PIAS4		TRIM5	JAK2	CIITA	IL6		TRIM5	TRIM5		PIAS4	PIAS4		Trim31		SHMT2		SHMT2		Ifi30
	CNOT7	ABCE1	TDRD7		IRF8	ZBP1		TRIM6	PTPN2	UBE2N	IL7		TRIM6	TRIM6		ZBP1	ZBP1		Otop1		SETD2		SETD2		Nub1
	OASL	BST2	TENT5A		FADD	PTPN1		TRIM62	IRF9	MIR3614	IRF1		TRIM62	TRIM62		PTPN1	PTPN1		Tlr3		TRIM56		TRIM56		Ifih1
	NLRC5	TRIM56	TMEM140		IRAK1	PTPN2		TRIM68	STX4	IFITM3	IRF2		TRIM68	TRIM68		PTPN2	PTPN2		Gsn		SMPD1		SMPD1		Xaf1
	MIR21	TBK1	TRAFD1		IFITM1	CACTIN		TRIM8	STXBP1	BST2	IRF4		TRIM8	TRIM8		CACTIN	CACTIN		Txk		B2M		B2M		Mx2
	LSM14A	IFIT1B	TRIM14		GBP2	MAVS		VCAM1	STXBP2	SUMO1	IRF5		VCAM1	VCAM1		MAVS	MAVS		Cyp11b1		BATF2		BATF2		Hsp90ab1
	XAF1	CNOT7	TRIM21		OAS1	IKBKE			STXBP3	NUP37	IRF7		CALCOCO2	CALCOCO2		IKBKE	IKBKE		Zyx		CASP1		CASP1		Psme2
	MMP12	OASL	TRIM25		IRF1	TBK1			GBP4	PIN1	IRF8		MYC	MYC		TBK1	TBK1		Mefv		CASP8		CASP8		B2m
	IFI6	NLRC5	TRIM26		OAS2	CNOT7			FCGR1A	MID1	IRF9		LGALS9C	LGALS9C		CNOT7	CNOT7		Eif4a2		CCRL2		CCRL2		Ifna1
	MUL1	MIR21	TRIM5		IRF2	NLRC5			FCGR1BP	NUP210	ISG15		CFH	CFH		NLRC5	NLRC5		Ccl5		CD47		CD47		Trim25
	YTHDF2	SMPD1	TXNIP		OAS3	MIR21			GBP5	TRIM8	ISG20		IL12B	IL12B		MIR21	MIR21		Snca		CD74		CD74		Eif2ak2
	YTHDF3	LSM14A	UBA7		IRF3	LSM14A			CIITA	IFI30	ISOC1		EPRS1	EPRS1		LSM14A	LSM14A		Mrc1		CMPK2		CMPK2		Ifna13
	MX1	XAF1	UBE2L6		IRF4	MMP12			IFITM3	MIR1248	ITGB7		IL12RB1	IL12RB1		MMP12	MMP12		Cldn1		CMTR1		CMTR1		Ifna2
	IP6K2	MMP12	USP18		IRF5	MUL1			BST2	EIF4E3	JAK2		SERPINA3	SERPINA3		MUL1	MUL1		Kpna7		CNP		CNP		Slc25a28
	MX2	IFI6	WARS1		IRF6	YTHDF2			SUMO1	PLCG1	KLRK1		IRGM	IRGM		YTHDF2	YTHDF2		Kpna4		CSF1		CSF1		Trim14
	HSP90AB1	MUL1			IRF7	YTHDF3			SUPT5H	ARIH1	LAP3		SP100	IL18		YTHDF3	YTHDF3		Hmgb1		CXCL10		CXCL10		Pnpt1
		YTHDF2			SAMHD1	HSP90AB1			RAB43	TRIM38	LATS2		GBP6	CDC42EP4		HSP90AB1	HSP90AB1		Nup98		CXCL11		CXCL11		Irf5
		YTHDF3			ISG20	MYD88			MID1	NUP160	LCP2		IL18	MYO1C		MYD88	MYD88		Klrk1		DDX60		DDX60		Cmtr1
		MX1			IFITM2	SHFL			XCL2	VCAM1	LGALS3BP		TRIM25	DDX58		SHFL	SHFL		Psmb10		DHX58		DHX58		Casp8
		IP6K2			CAV1	SHMT2			HPX	NUP153	LY6E		CDC42EP4	GAPDH		SHMT2	SHMT2		Lats2		EIF2AK2		EIF2AK2		Ifi27
		MX2			TRIM6	SETD2			TRIM8	IP6K2	LYSMD2		HLA-A	LGALS9B		SETD2	SETD2		Ccl7		ELF1		ELF1		Shfl
		HSP90AB1			IFI27	TRIM56			CDC42EP2	TRIM48	MARCHF1		MYO1C	SHFL		TRIM56	TRIM56		Casp3		EPSTI1		EPSTI1		Ifi35
					DCST1	IFIT1B			IFI30	PML	METTL7B		HLA-B	CYP11B1		IFIT1B	IFIT1B		Ncam1		GMPR		GMPR		Ifna4
					IFI35	SMPD1			AIF1	KPNA1	MT2A		DDX58	CYP11B2		SMPD1	SMPD1		Vamp5		HELZ2		HELZ2		Il15
					ADAR	B2M			NLRC5	KPNB1	MTHFD2		HLA-C	STXBP4		B2M	B2M		Casp4		HERC6		HERC6		Trim6
					IFIT2	BATF2			CCL1	KPNA2	MVP		GBP7	RPS6KB1		BATF2	BATF2		Eif4e		IFI30		IFI30		Il7
					IFIT1	C1S			CCL2	EIF4E2	MX1		GAPDH	PECAM1		C1S	C1S		Trim46		IFI44		IFI44		Irf7
					IFIT3	CASP1			CCL3	KPNA3	MX2		LGALS9B	CYP27B1		CASP1	CASP1		Dapk1		IFI44L		IFI44L		Zbp1
					IFNA1	CASP8			CCL3L1	KPNA4	MYD88		HLA-DPA1	SLC30A8		CASP8	CASP8		Edn1		IFIH1		IFIH1		Nlrc5
					IFNA2	CCRL2			CCL4	KPNA5	NAMPT		SHFL	ACTG1		CCRL2	CCRL2		Eif4e3		IL15		IL15		Herc6
					IFNA4	CD47			CCL5	TRIM46	NCOA3		HLA-DPB1	HMGB1		CD47	CD47		Nup93		IL7		IL7		Plscr1
					IFNA5	CD74			NR1H2	FLNB	NFKB1		HLA-DQA1	DAPK1		CD74	CD74		Upp1		LAMP3		LAMP3		Cd74
					IFNA6	CMPK2			CCL7	RANBP2	NFKBIA		HLA-DQA2	DAPK3		CMPK2	CMPK2		Cxcl9		LAP3		LAP3		Irf6
					IFNA7	CMTR1			CCL8	TRIM2	NLRC5		TRIM26	GCH1		CMTR1	CMTR1		Camk2b		LGALS3BP		LGALS3BP		Il23r
					STAT1	CNP			PARP9	RAE1	NMI		HLA-DQB1	SIRPB1		CNP	CNP		Ifngr1		LPAR6		LPAR6		Auts2
					IFNA8	CSF1			CCL11	NUP107	NOD1		HLA-DQB2	SIRPA		CSF1	CSF1		Ccl24		LY6E		LY6E		Znfx1
					STAT2	CXCL10			CCL13	CAMK2A	NUP93		CYP11B1	CCL26		CXCL10	CXCL10		Cyp11b2		MOV10		MOV10		Gapdh
					IFNA10	CXCL11			CCL14	CAMK2B	OAS2		CYP11B2	ZYX		CXCL11	CXCL11		Kpna2		MVB12A		MVB12A		Il18bp
					IFNA13	DDX60			KIF5B	CAMK2D	OAS3		HLA-DRA	MEFV		DDX60	DDX60		St3gal5		NCOA7		NCOA7		Rab11fip5
					IFNA14	DHX58			CCL15	CAMK2G	OASL		HLA-DRB1	STAR		DHX58	DHX58		Cmklr1		NMI		NMI		Il18
					IFNA16	EIF2AK2			CCL16	ICAM1	OGFR		STXBP4	VAMP3		EIF2AK2	EIF2AK2		Ppm1b		NUB1		NUB1		Rpl13a
					IFNA17	ELF1			CCL17	SOCS3	P2RY14		HLA-DRB3	CFHR4		ELF1	ELF1		Ccl8		OGFR		OGFR		Mid1
					IFNA21	EPSTI1			CCL18	NUP88	PARP12		HLA-DRB4	TXK		EPSTI1	EPSTI1		Gzma		PARP12		PARP12		Ccl26
					IFNAR1	GBP4			CCL19	NUP98	PARP14		RPS6KB1	CFHR3		GBP4	GBP4		Nr1h3		PARP14		PARP14		Isoc1
					IFNAR2	GMPR			CCL20	IRF8	PDE4B		B2M	NOD2		GMPR	GMPR		Ccl25		PARP9		PARP9		Pias1
					IFNB1	HELZ2			CCL21	TRIM31	PELI1		HLA-DRB5	SIRPG		HELZ2	HELZ2		Marchf1		PLSCR1		PLSCR1		Trim62
					TYK2	HERC6			CCL22	NUP43	PFKP		PECAM1	ACOD1		HERC6	HERC6		Il6		PNPT1		PNPT1		Arl4a
					TTLL12	IFI30			CCL23	IFITM1	PIM1		CYP27B1	PTPN2		IFI30	IFI30		Pfkp		PROCR		PROCR		Nup50
					JAK1	IFI44			CCL24	OAS1	PLA2G4A		HLA-E	STX4		IFI44	IFI44		Rab12		PSMA3		PSMA3		Tnfsf10
					CDC37	IFI44L			CCL25	OAS2	PLSCR1		HLA-F	STXBP1		IFI44L	IFI44L		Camk2g		PSMB9		PSMB9		Cd40
					PIAS4	IFIH1			XCL1	OAS3	PML		HLA-G	STXBP2		IFIH1	IFIH1		Ccl3		PSME1		PSME1		Tlr4
					ZBP1	IL15			SEC61A1	SAMHD1	PNP		HLA-H	STXBP3		IL15	IL15		Capg		PSME2		PSME2		Flnb
					PTPN1	IL4R			CX3CL1	NUP214	PNPT1		SLC30A8	FCGR1BP		IL4R	IL4R		Pecam1		RIPK2		RIPK2		Ranbp2
					PTPN2	IL7			NOS2	IFITM2	PSMA2		ACTG1	IFITM3		IL7	IL7		Ccl2		RNF31		RNF31		Stat3
					IRF9	LAMP3			TRIM38	TRIM68	PSMA3		GBP1	BST2		LAMP3	LAMP3		Nfkb1		RTP4		RTP4		Il12rb1
					CACTIN	LAP3			KYNU	NUP42	PSMB10		GBP2	SUMO1		LAP3	LAP3		Ccl4		SAMD9L		SAMD9L		Ubb
					PTPN6	LGALS3BP			IL23R	POM121C	PSMB2		HMGB1	SUPT5H		LGALS3BP	LGALS3BP		Icam1		SELL		SELL		Aqp4
					PTPN11	LPAR6			VCAM1	IFI27	PSMB8		GBP3	RAB43		LPAR6	LPAR6		Xcl1		SLC25A28		SLC25A28		Trim29
					RSAD2	LY6E			PML	IFI35	PSMB9		IRF1	XCL2		LY6E	LY6E		Rab20		SP110		SP110		Slc30a8
					RNASEL	MOV10			SYNCRIP	IFIT2	PSME1		DAPK1	HPX		MOV10	MOV10		Dapk3		TAP1		TAP1		Stxbp2
					MAVS	MVB12A			HSP90AB1	IFIT1	PSME2		IRF2	CDC42EP2		MVB12A	MVB12A		Vps26b		TDRD7		TDRD7		Gbp7
					ISG15	NCOA7			RAB12	PIAS1	PTGS2		NCAM1	AIF1		NCOA7	NCOA7		Myo18a		TENT5A		TENT5A		Pom121
					EGR1	NMI			VIM	IFIT3	PTPN1		DAPK3	NLRC5		NMI	NMI		Vamp3		TMEM140		TMEM140		Itgb7
					IKBKE	NUB1			MRC1	IFNA1	PTPN2		IRF3	CCL1		NUB1	NUB1		Slamf7		TRAFD1		TRAFD1		Il2rb
					IFITM3	OGFR			STX8	IFNA2	PTPN6		IRF4	CCL2		OGFR	OGFR		Psmb2		TRIM14		TRIM14		Selp
					ABCE1	PARP12			EVL	IFNA4	RAPGEF6		IRF5	CCL3		PARP12	PARP12		Nup133		TRIM21		TRIM21		Gch1
					BST2	PARP14			FLNB	IFNA5	RBCK1		IRF6	CCL3L1		PARP14	PARP14		Fas		TRIM25		TRIM25		Slc11a1
					TBK1	PARP9			CCL4L1	TRIM5	RIPK1		TRIM34	CCL4		PARP9	PARP9		Cd38		TRIM26		TRIM26		Camk2a
					CNOT7	PLSCR1			WAS	IFNA6	RIPK2		IRF7	CCL5		PLSCR1	PLSCR1		Stxbp4		TXNIP		TXNIP		Casp7
					OASL	PNPT1			UBD	IFNA7	RNF213		TRIM21	NR1H2		PNPT1	PNPT1		Cdkn1a		UBA7		UBA7		Rae1
					NLRC5	PROCR			VPS26B	TRIM3	RNF31		GCH1	CCL7		PROCR	PROCR		Sec61a1		UBE2L6		UBE2L6		Ifngr2
					MIR21	PSMA3			CAMK2A	IFNA8	RSAD2		SIRPB1	CCL8		PSMA3	PSMA3		Cd44		CAMK2A		CAMK2A		Trim45
					LSM14A	PSMB9			CAMK2B	IFNA10	RTP4		SIRPA	PARP9		PSMB9	PSMB9		Tdgf1		CAMK2B		CAMK2B		Nup205
					XAF1	PSME1			CAMK2D	IFNA13	SAMD9L		PTAFR	CCL11		PSME1	PSME1		Kif5b		CAMK2D		CAMK2D		Nup214
					MMP12	PSME2			CAMK2G	PPM1B	SAMHD1		CCL26	CCL13		PSME2	PSME2		Trim8		CAMK2G		CAMK2G		Pde4b
					IFI6	RIPK2			WNT5A	IFNA14	SECTM1		TRIM22	CCL14		RIPK2	RIPK2		Vcam1		CD44		CD44		Cfb
					MUL1	RNF31			CAPG	NUP35	SELP		ZYX	KIF5B		RNF31	RNF31		Ubd		CIITA		CIITA		Ube2e1
					YTHDF2	RTP4			ICAM1	IFNA16	SERPING1		MEFV	CCL15		RTP4	RTP4		Trim35		GBP3		GBP3		Actg1
					YTHDF3	SAMD9			SOCS3	IFNA17	SLAMF7		STAR	CCL16		SAMD9	SAMD9		Stx8		GBP5		GBP5		P2ry14
					MX1	SAMD9L			KIF16B	TRIM10	SLC25A28		STAT1	CCL17		SAMD9L	SAMD9L		Ido1		GBP6		GBP6		Nup160
					IP6K2	SELL			MYO18A	IFNA21	SOCS1		VAMP3	CCL18		SELL	SELL		Pml		GBP7		GBP7		Dnaja3
					MX2	SLC25A28			CASP1	IFNAR1	SOCS3		CFHR4	CCL19		SLC25A28	SLC25A28		Rnf213		ICAM1		ICAM1		Nup85
					HSP90AB1	SP110			IRF8	IFNAR2	SOD2		TXK	CCL20		SP110	SP110		Nod1		IFNG		IFNG		Eif4a3
					MYD88	TAP1			TRIM31	IFNB1	SP110		CFHR3	CCL21		TAP1	TAP1		St8sia4		IFNGR1		IFNGR1		Cd69
					USP18	TDRD7			IFITM1	IFNG	SPPL2A		NOD2	CCL22		TDRD7	TDRD7		Cdc42ep4		IFNGR2		IFNGR2		Plcg1
					TREX1	TENT5A			OAS1	IFNGR1	SRI		SIRPG	CCL23		TENT5A	TENT5A		Nod2		JAK2		JAK2		Kpnb1
					SP100	TMEM140			OAS2	IFNGR2	SSPN		ACOD1	CCL24		TMEM140	TMEM140		Ube2n		MID1		MID1		Tpr
					METTL3	TRAFD1			OAS3	TRIM45	ST3GAL5		JAK1	CCL25		TRAFD1	TRAFD1		Trim10		NCAM1		NCAM1		Cd86
					UBE2K	TRIM14			NR1H3	MT2A	ST8SIA4		JAK2	XCL1		TRIM14	TRIM14		Gbp3		PML		PML		Nup210
					HLA-A	TRIM21			CXCL16	AAAS	STAT1		PTPN2	SEC61A1		TRIM21	TRIM21		Nup35		PRKCD		PRKCD		Vamp4
					HLA-B	TRIM25			CITED1	RSAD2	STAT2		IRF9	CX3CL1		TRIM25	TRIM25		Cx3cl1		PTAFR		PTAFR		Ass1
					DDX58	TRIM26			TDGF1	RNASEL	STAT3		STX4	NOS2		TRIM26	TRIM26		Il10ra		TRIM10		TRIM10		Ccl19
					HLA-C	TRIM5			IFITM2	NDC1	STAT4		STXBP1	KYNU		TRIM5	TRIM5		Arih1		TRIM2		TRIM2		Kpna1
					SHFL	TXNIP			ADAMTS13	NUP155	TAP1		STXBP2	IL23R		TXNIP	TXNIP		Apol6		TRIM29		TRIM29		Gbp5
					WNT5A	UBA7			TDGF1P3	ISG15	TAPBP		STXBP3	SYNCRIP		UBA7	UBA7		Stx11		TRIM3		TRIM3		Lysmd2
					HLA-E	UBE2L6			TRIM68	EGR1	TDRD7		GBP4	HSP90AB1		UBE2L6	UBE2L6		Eif4g2		TRIM31		TRIM31		Evl
					HLA-F	WARS1			CCL4L2	EIF4A1	TNFAIP2		FCGR1A	RAB12		WARS1	WARS1		Rbck1		TRIM35		TRIM35		Vim
					HLA-G				PPARG	EIF4A2	TNFAIP3		FCGR1BP	VIM		B2M	CAMK2A		Sod2		TRIM38		TRIM38		Nos2
					HLA-H				MED1	TRIM17	TNFAIP6		GBP5	MRC1		CAMK2A	CAMK2B		Tnfaip3		TRIM45		TRIM45		Ptgs2
					PSMB8				RAB20	TRIM62	TNFSF10		CIITA	STX8		CAMK2B	CAMK2D		Hck		TRIM46		TRIM46		Rps27a
					IRF8				PARP14	EIF4E	TOR1B		IFITM3	EVL		CAMK2D	CAMK2G		Bpgm		TRIM62		TRIM62		Sri
					FADD				FAS	EIF4G1	TRAFD1		BST2	FLNB		CAMK2G	CD44		Nup155		TRIM68		TRIM68		Stxbp3
					IRAK1				FASLG	EIF4G2	TRIM14		SUMO1	CCL4L1		CD44	CIITA		Aif1		TRIM8		TRIM8		Mettl7b
					IFITM1				CCL3L3	OASL	TRIM21		SUPT5H	WAS		CIITA	FCGR1A		Calcoco2		VCAM1		VCAM1		Btg1
					SHMT2				AQP4	CD44	TRIM25		RAB43	UBD		FCGR1A	FCGR1B		Ndc1		CALCOCO2		CALCOCO2		Ccl17
					GBP2				PIAS1	NUP133	TRIM26		MID1	VPS26B		FCGR1B	GBP1		Hif1a		MYC		MYC		Ccl22
					OAS1				ACTR3	SOCS1	TXNIP		XCL2	WNT5A		GBP1	GBP3		Uba52		CFH		CFH		Syncrip
					IRF1				ACTR2	PRKCD	UBE2L6		HPX	CAPG		GBP2	GBP5		Ciita		IL12B		IL12B		Nup43
					OAS2				EDN1	XAF1	UPP1		TRIM8	KIF16B		GBP3	GBP6		Eif4g3		IL12RB1		IL12RB1		Actr2
					IRF2				TRIM5	MIR630	USP18		CDC42EP2	MYO18A		GBP4	GBP7		Hpx		IL18		IL18		Bank1
					OAS3				CLDN1	NUP188	VAMP5		IFI30	CASP1		GBP5	HLA-DPA1		Nup107		CDC42EP4		CDC42EP4		Myo1c
					IRF3				GSN	NUP93	VAMP8		AIF1	IFITM1		GBP6	HLA-DPB1		Trim68		MYO1C		MYO1C		Ccl11
					IRF4				LGALS9	MAPK3	VCAM1		NLRC5	NR1H3		GBP7	HLA-DQA1		Asl		GAPDH		GAPDH		Pla2g4a
					IRF5				ARG1	EIF4G3	WARS1		CCL1	CXCL16		HLA-A	HLA-DQA2		Vamp8		CYP11B1		CYP11B1		Nr1h2
					IRF6				ARG2	MIR5193	XAF1		CCL2	CITED1		HLA-B	HLA-DQB1		Trim2		CYP11B2		CYP11B2		Was
					IRF7				IFNG	IFI6	XCL1		CCL3	TDGF1		HLA-C	HLA-DQB2		Eif4g1		STXBP4		STXBP4		Trim31
					SAMHD1				IFNGR1	EIF2AK2	ZBP1		CCL3L1	IFITM2		HLA-DPA1	HLA-DRA		Cdc42		RPS6KB1		RPS6KB1		Otop1
					ISG20				IFNGR2	MX1	ZNFX1		CCL4	ADAMTS13		HLA-DPB1	HLA-DRB1		Acod1		PECAM1		PECAM1		Tlr3
					IFITM2				CDC37	HERC5			CCL5	TDGF1P3		HLA-DQA1	HLA-DRB3		Nup88		CYP27B1		CYP27B1		Gsn
					CAV1				DNAJA3	MX2			NR1H2	CCL4L2		HLA-DQA2	HLA-DRB4		Prkcd		SLC30A8		SLC30A8		Txk
					TRIM6				MT2A				CCL7	PPARG		HLA-DQB1	HLA-DRB5		Actr3		ACTG1		ACTG1		Cyp11b1
					IFI27				NMI				CCL8	MED1		HLA-DQB2	ICAM1		Fgl2		HMGB1		HMGB1		Zyx
					DCST1				PDE12				PARP9	RAB20		HLA-DRA	IFNG		Fpr1		DAPK1		DAPK1		Mefv
					IFI35				SLC11A1				CCL11	PARP14		HLA-DRB1	IFNGR1		Ubc		DAPK3		DAPK3		Eif4a2
					ADAR				CD86				CCL13	FAS		HLA-DRB3	IFNGR2		Myc		GCH1		GCH1		Ccl5
					IFIT2				ASL				CCL14	FASLG		HLA-DRB4	JAK2		Lcp2		SIRPA		SIRPA		Snca
					IFIT1				TRIM62				KIF5B	CCL3L3		HLA-DRB5	MID1		Camk2d		CCL26		CCL26		Mrc1
					IFIT3				TLR2				CCL15	AQP4		HLA-E	MT2A		Adamts13		ZYX		ZYX		Cldn1
					IFNA1				TLR3				CCL16	PIAS1		HLA-F	NCAM1		Il15ra		MEFV		MEFV		Kpna7
					IFNA2				TLR4				CCL17	ACTR3		HLA-G	PML		Serping1		STAR		STAR		Kpna4
					IFNA4				ASS1				CCL18	ACTR2		HLA-H	PRKCD		Eif4a1		VAMP3		VAMP3		Hmgb1
					IFNA5				CD40				CCL19	EDN1		ICAM1	PTAFR		Il12b		CFHR4		CFHR4		Nup98
					IFNA6				OASL				CCL20	CLDN1		IFI30	TRIM10		Rapgef6		TXK		TXK		Klrk1
					IFNA7				CD44				CCL21	GSN		IFNG	TRIM17		Psma2		NOD2		NOD2		Psmb10
					STAT1				CD47				CCL22	LGALS9		IFNGR1	TRIM2		Tnfaip2		ACOD1		ACOD1		Lats2
					IFNA8				CD58				CCL23	ARG1		IFNGR2	TRIM22		Ptafr		STXBP1		STXBP1		Ccl7
					STAT2				OTOP1				CCL24	ARG2		IRF1	TRIM29		Cfh		STXBP2		STXBP2		Casp3
					IFNA10				RAB11FIP5				CCL25	CDC37		IRF2	TRIM3		Gpr18		STXBP3		STXBP3		Ncam1
					IFNA13				SOCS1				XCL1	DNAJA3		IRF3	TRIM31		Nup153		SUMO1		SUMO1		Vamp5
					IFNA14				RAB7B				SEC61A1	NMI		IRF4	TRIM34		Trim38		RAB43		RAB43		Casp4
					IFNA16				CD74				CX3CL1	PDE12		IRF5	TRIM35		Rab43		HPX		HPX		Eif4e
					IFNA17				PRKCD				NOS2	SLC11A1		IRF6	TRIM38		Seh1l		CDC42EP2		CDC42EP2		Trim46
					IFNA21				NUB1				TRIM38	CD86		IRF7	TRIM45		Sspn		AIF1		AIF1		Dapk1
					IFNAR1				SNCA				KYNU	ASL		IRF8	TRIM46		Slc26a6		CCL1		CCL1		Edn1
					IFNAR2				RPL13A				IL23R	TLR2		IRF9	TRIM48		Stat4		CCL2		CCL2		Eif4e3
					IFNB1				VAMP8				VCAM1	TLR3		JAK1	TRIM62		Gbp6		CCL3		CCL3		Nup93
					TYK2				VAMP4				PML	TLR4		JAK2	TRIM68		Sirpa		CCL4		CCL4		Upp1
					TTLL12				STX11				SYNCRIP	ASS1		MID1	TRIM8		Star		CCL5		CCL5		Cxcl9
					JAK1				MIR511				HSP90AB1	CD40		MT2A	VCAM1		Rps6kb1		NR1H2		NR1H2		Camk2b
					CDC37				CDC42				RAB12	CD47		NCAM1	CALCOCO2		Csf2rb		CCL7		CCL7		Ifngr1
					PIAS4				HCK				VIM	CD58		OAS1	MYC		Cdc42ep2		CCL8		CCL8		Ccl24
					ZBP1				SLC26A6				MRC1	OTOP1		OAS2	LGALS9C		Kif16b		CCL11		CCL11		Cyp11b2
					PTPN1				TP53				STX8	RAB11FIP5		OAS3	CFH		Nup188		KIF5B		KIF5B		Kpna2
					PTPN2								EVL	RAB7B		OASL	IL12B		Nampt		CCL17		CCL17		St3gal5
					IRF9								FLNB	CD74		PML	EPRS1		Lgals9		CCL19		CCL19		Cmklr1
					CACTIN								CCL4L1	NUB1		PRKCD	IL12RB1		Ccl20		CCL20		CCL20		Ppm1b
					SETD2								WAS	SNCA		PTAFR	SERPINA3		Rab7b		CCL22		CCL22		Ccl8
					PTPN6								UBD	RPL13A		PTPN6	IRGM		Cd274		CCL24		CCL24		Gzma
					PTPN11								VPS26B	VAMP8		SOCS1	IL18		Nedd4		CCL25		CCL25		Nr1h3
					RSAD2								CAMK2A	VAMP4		SOCS3	CDC42EP4		Cyp27b1		XCL1		XCL1		Ccl25
					RNASEL								CAMK2B	STX11		SP100	MYO1C		Cxcl16		SEC61A1		SEC61A1		Marchf1
					MAVS								CAMK2D	MIR511		STAT1	GAPDH		Ccl1		CX3CL1		CX3CL1		Il6
					ISG15								CAMK2G	CDC42		TRIM10	LGALS9B		Ripk1		NOS2		NOS2		Pfkp
					EGR1								WNT5A	HCK		TRIM14	CYP11B1		Pde12		KYNU		KYNU		Rab12
					IKBKE								CAPG	SLC26A6		TRIM17	CYP11B2		Cited1		IL23R		IL23R		Camk2g
					IFITM3								ICAM1	TP53		TRIM2	STXBP4		Pnp		SYNCRIP		SYNCRIP		Ccl3
					ABCE1								SOCS3	TPR		TRIM21	RPS6KB1		Tapbp		RAB12		RAB12		Capg
					BST2								KIF16B	SEH1L		TRIM22	PECAM1		Nup37		VIM		VIM		Pecam1
					TRIM56								MYO18A	NUP50		TRIM25	CYP27B1		Kpna3		MRC1		MRC1		Ccl2
					TBK1								CASP1	USP18		TRIM26	SLC30A8		Sppl2a		STX8		STX8		Nfkb1
					IFIT1B								IRF8	UBE2L6		TRIM29	ACTG1		Mapk3		EVL		EVL		Ccl4
					CNOT7								TRIM31	NUP85		TRIM3	HMGB1		Sumo1		FLNB		FLNB		Icam1
					OASL								IFITM1	EIF4A3		TRIM31	DAPK1		Aaas		WAS		WAS		Xcl1
					NLRC5								OAS1	PSMB8		TRIM34	DAPK3		Arg1		UBD		UBD		Rab20
					MIR21								OAS2	NUP62		TRIM35	GCH1		Peli1		VPS26B		VPS26B		Dapk3
					SMPD1								OAS3	ISG20		TRIM38	SIRPB1		Eif4e2		CAPG		CAPG		Vps26b
					LSM14A								NR1H3	RPS27A		TRIM45	SIRPA		Nup54		KIF16B		KIF16B		Myo18a
					XAF1								CXCL16	NUP58		TRIM46	CCL26		Jak2		MYO18A		MYO18A		Vamp3
					MMP12								CITED1	USP41		TRIM48	ZYX		Mvp		NR1H3		NR1H3		Slamf7
					IFI6								TDGF1	ADAR		TRIM5	MEFV		Tnfaip6		CXCL16		CXCL16		Psmb2
					MUL1								IFITM2	STAT2		TRIM6	STAR		Nfkbia		CITED1		CITED1		Nup133
					YTHDF2								ADAMTS13	NUP54		TRIM62	VAMP3		Arg2		TDGF1		TDGF1		Fas
					YTHDF3								TDGF1P3	NUP205		TRIM68	CFHR4		Pparg		ADAMTS13		ADAMTS13		Cd38
					MX1								TRIM68	NEDD4		TRIM8	TXK		Arid5b		PPARG		PPARG		Stxbp4
					IP6K2								CCL4L2	TYK2		VCAM1	CFHR3		Mthfd2		MED1		MED1		Cdkn1a
					MX2								PPARG	PTPN1		CALCOCO2	NOD2		Kynu		RAB20		RAB20		Sec61a1
					HSP90AB1								MED1	UBA52		MYC	SIRPG		Tor1b		FAS		FAS		Cd44
					ADAR								RAB20	KPNA7		LGALS9C	ACOD1		Med1		AQP4		AQP4		Tdgf1
					B2M								PARP14	UBB		CFH	STX4		Trim3		PIAS1		PIAS1		Kif5b
					BATF2								FAS	UBC		IL12B	STXBP1		Stxbp1		ACTR3		ACTR3		Trim8
					BST2								FASLG	PTPN11		EPRS1	STXBP2		Pim1		ACTR2		ACTR2		Vcam1
					C1S								CCL3L3	UBA7		IL12RB1	STXBP3		Nup62		EDN1		EDN1		Ubd
					CASP1								AQP4	POM121		SERPINA3	FCGR1BP		Tlr2		CLDN1		CLDN1		Trim35
					CASP8								PIAS1	UBE2E1		IRGM	SUMO1		Cfhr4		GSN		GSN		Stx8
					CCRL2								ACTR3	UBE2N		IL18	SUPT5H		Pin1		LGALS9		LGALS9		Ido1
					CD47								ACTR2	MIR3614		CDC42EP4	RAB43		Ifng		ARG1		ARG1		Pml
					CD74								EDN1	NUP37		MYO1C	XCL2		Ncoa3		ARG2		ARG2		Rnf213
					CMPK2								TRIM5	PIN1		DDX58	HPX		Sell		DNAJA3		DNAJA3		Nod1
					CMTR1								CLDN1	NUP210		GAPDH	CDC42EP2		Gmpr		PDE12		PDE12		St8sia4
					CNP								GSN	MIR1248		LGALS9B	AIF1		Procr		SLC11A1		SLC11A1		Cdc42ep4
					CSF1								LGALS9	EIF4E3		SHFL	CCL1		Cnot7		CD86		CD86		Nod2
					CXCL10								ARG1	PLCG1		CYP11B1	CCL2		Tmem140		ASL		ASL		Ube2n
					CXCL11								ARG2	ARIH1		CYP11B2	CCL3		Tent5a		TLR2		TLR2		Trim10
					DDX60								IFNG	NUP160		STXBP4	CCL3L1		Fadd		TLR3		TLR3		Gbp3
					DHX58								IFNGR1	NUP153		RPS6KB1	CCL4		Irak1		TLR4		TLR4		Nup35
					EIF2AK2								IFNGR2	IP6K2		PECAM1	CCL5		Ythdf2		ASS1		ASS1		Cx3cl1
					ELF1								CDC37	KPNA1		CYP27B1	NR1H2		Dcst1		CD40		CD40		Il10ra
					EPSTI1								DNAJA3	KPNB1		SLC30A8	CCL7		Setd2		OTOP1		OTOP1		Arih1
					GBP2								MT2A	KPNA2		ACTG1	CCL8		Lpar6		RAB11FIP5		RAB11FIP5		Apol6
					GBP4								NMI	EIF4E2		HMGB1	CCL11		Lamp3		RAB7B		RAB7B		Stx11
					GMPR								PDE12	KPNA3		DAPK1	CCL13		Lsm14a		SNCA		SNCA		Eif4g2
					HELZ2								SLC11A1	KPNA4		DAPK3	CCL14		Trex1		RPL13A		RPL13A		Rbck1
					HERC6								CD86	KPNA5		GCH1	KIF5B		Mul1		VAMP8		VAMP8		Sod2
					HLA-C								ASL	RANBP2		SIRPB1	CCL15		Mettl3		VAMP4		VAMP4		Tnfaip3
					IFI27								TRIM62	RAE1		SIRPA	CCL16		Tbk1		STX11		STX11		Hck
					IFI30								TLR2	NUP107		CCL26	CCL17		Trim56		CDC42		CDC42		Bpgm
					IFI35								TLR3	NUP88		ZYX	CCL18		Shmt2		HCK		HCK		Nup155
					IFI44								TLR4	NUP98		MEFV	CCL19		Ythdf3		SLC26A6		SLC26A6		Aif1
					IFI44L								ASS1	NUP43		STAR	CCL20		Cav1		TPR		TPR		Calcoco2
					IFIH1								CD40	SAMHD1		VAMP3	CCL21		Mavs		SEH1L		SEH1L		Ndc1
					IFIT2								OASL	NUP214		CFHR4	CCL22		Ikbke		NUP50		NUP50		Hif1a
					IFIT3								CD44	NUP42		TXK	CCL23		Mmp12		NUP85		NUP85		Uba52
					IFITM1								CD47	POM121C		CFHR3	CCL24		Ttll12		EIF4A3		EIF4A3		Ciita
					IFITM2								CD58	IFI27		NOD2	CCL25		Ncoa7		NUP62		NUP62		Eif4g3
					IFITM3								OTOP1	IFI35		SIRPG	XCL1		Ccrl2		RPS27A		RPS27A		Hpx
					IL15								RAB11FIP5	IFIT2		ACOD1	SEC61A1		Elf1		NUP54		NUP54		Nup107
					IL4R								SOCS1	IFIT1		PTPN2	CX3CL1		Mvb12a		NUP205		NUP205		Trim68
					IL7								RAB7B	IFIT3		STX4	NOS2		Csf1		NEDD4		NEDD4		Asl
					IRF1								CD74	IFNA1		STXBP1	KYNU		Smpd1		UBA52		UBA52		Vamp8
					IRF2								PRKCD	IFNA2		STXBP2	IL23R		Cnp		KPNA7		KPNA7		Trim2
					IRF7								NUB1	IFNA4		STXBP3	SYNCRIP		Ube2k		UBB		UBB		Eif4g1
					IRF9								SNCA	IFNA5		FCGR1BP	RAB12		Abce1		UBC		UBC		Cdc42
					ISG15								RPL13A	IFNA6		IFITM3	VIM		Mov10		POM121		POM121		Acod1
					ISG20								VAMP8	IFNA7		BST2	MRC1		Cactin		UBE2E1		UBE2E1		Nup88
					LAMP3								VAMP4	IFNA8		SUMO1	STX8		Pias4		UBE2N		UBE2N		Prkcd
					LAP3								STX11	IFNA10		SUPT5H	EVL		Pabpc4		NUP37		NUP37		Actr3
					LGALS3BP								MIR511	IFNA13		RAB43	FLNB		Slc27a1		PIN1		PIN1		Fgl2
					LPAR6								CDC42	PPM1B		XCL2	CCL4L1		Pcnx		NUP210		NUP210		Fpr1
					LY6E								HCK	IFNA14		HPX	WAS		Ninj1		EIF4E3		EIF4E3		Ubc
					MOV10								SLC26A6	NUP35		CDC42EP2	UBD		Rbmx2		PLCG1		PLCG1		Myc
					MVB12A								TP53	IFNA16		AIF1	VPS26B		Lyrm2		ARIH1		ARIH1		Lcp2
					MX1								TPR	IFNA17		NLRC5	CAPG		Ano9		NUP160		NUP160		Camk2d
					NCOA7								SEH1L	IFNA21		CCL1	KIF16B		Olfr516		NUP153		NUP153		Adamts13
					NMI								NUP50	IFNAR1		CCL2	MYO18A		Pcdhgb5		KPNA1		KPNA1		Il15ra
					NUB1								USP18	IFNAR2		CCL3	NR1H3		Olfr1342		KPNB1		KPNB1		Serping1
					OAS1								SP100	IFNB1		CCL3L1	CXCL16		Plac9a		KPNA2		KPNA2		Eif4a1
					OASL								GBP6	AAAS		CCL4	CITED1		Gm6268		EIF4E2		EIF4E2		Il12b
					OGFR								TRIM25	RSAD2		CCL5	TDGF1		Cnrip1		KPNA3		KPNA3		Rapgef6
					PARP12								UBE2L6	RNASEL		NR1H2	ADAMTS13		Asb17		KPNA4		KPNA4		Psma2
					PARP14								NUP85	NDC1		CCL7	TDGF1P3		Adam26b		RANBP2		RANBP2		Tnfaip2
					PARP9								HLA-A	NUP155		CCL8	CCL4L2		Stmnd1		RAE1		RAE1		Ptafr
					PLSCR1								HLA-B	ISG15		PARP9	PPARG		Trim13		NUP107		NUP107		Cfh
					PNPT1								DDX58	EGR1		CCL11	MED1		Klrg2		NUP88		NUP88		Gpr18
					PROCR								HLA-C	EIF4A1		CCL13	RAB20		Tmem8b		NUP98		NUP98		Nup153
					PSMA3								GBP7	EIF4A2		CCL14	FAS		Col1a2		NUP43		NUP43		Trim38
					PSMB8								HLA-DPA1	EIF4E		KIF5B	FASLG		Man2a1		NUP214		NUP214		Rab43
					PSMB9								HLA-DPB1	EIF4G1		CCL15	CCL3L3		Ms4a8a		PPM1B		PPM1B		Seh1l
					PSME1								HLA-DQA1	EIF4G2		CCL16	AQP4		Gm20764		NUP35		NUP35		Sspn
					PSME2								HLA-DQA2	NUP133		CCL17	PIAS1		Hes6		AAAS		AAAS		Slc26a6
					RIPK2								TRIM26	XAF1		CCL18	ACTR3		Rsl1		NDC1		NDC1		Stat4
					RNF31								HLA-DQB1	MIR630		CCL19	ACTR2		D430041D05Rik		NUP155		NUP155		Gbp6
					RSAD2								EIF4A3	NUP188		CCL20	EDN1		Mapk1ip1		EIF4A1		EIF4A1		Sirpa
					RTP4								TRIM35	NUP93		CCL21	CLDN1		Tmed5		EIF4A2		EIF4A2		Star
					SAMD9								HLA-DQB2	MAPK3		CCL22	GSN		Mndal		EIF4E		EIF4E		Rps6kb1
					SAMD9L								HLA-DRA	EIF4G3		CCL23	LGALS9		Ephb3		EIF4G1		EIF4G1		Csf2rb
					SELL								HLA-DRB1	MIR5193		CCL24	ARG1		Abcc8		EIF4G2		EIF4G2		Cdc42ep2
					SLC25A28								HLA-DRB3	IFI6		CCL25	ARG2		Plce1		NUP133		NUP133		Kif16b
					SP110								HLA-DRB4	EIF2AK2		XCL1	DNAJA3		Gm20741		NUP188		NUP188		Nup188
					STAT2								B2M	MX1		SEC61A1	PDE12		Ddn		NUP93		NUP93		Nampt
					TAP1								HLA-DRB5	HERC5		CX3CL1	SLC11A1		Gpc1		MAPK3		MAPK3		Lgals9
					TDRD7								HLA-E	MX2		NOS2	CD86		Eva1b		EIF4G3		EIF4G3		Ccl20
					TENT5A								HLA-F	APOL6		KYNU	ASL		Ube2e2		APOL6		APOL6		Rab7b
					TMEM140								HLA-G	ARID5B		IL23R	TLR2		Baz1b		ARID5B		ARID5B		Cd274
					TRAFD1								HLA-H	ARL4A		SYNCRIP	TLR3		Dbf4		ARL4A		ARL4A		Nedd4
					TRIM14								PSMB8	AUTS2		HSP90AB1	TLR4		Hmgn3		AUTS2		AUTS2		Cyp27b1
					TRIM21								GBP1	BANK1		RAB12	ASS1		Mymx		BANK1		BANK1		Cxcl16
					TRIM25								GBP2	BATF2		VIM	CD40		Pja1		BPGM		BPGM		Ccl1
					TRIM26								GBP3	BPGM		MRC1	CD58		Nectin2		BTG1		BTG1		Ripk1
					TRIM5								IRF1	BTG1		STX8	OTOP1		Noa1		CASP3		CASP3		Pde12
					TXNIP								IRF2	C1R		EVL	RAB11FIP5		Cdk10		CASP4		CASP4		Cited1
					UBA7								NCAM1	C1S		FLNB	RAB7B		Chrne		CASP7		CASP7		Pnp
					UBE2L6								IRF3	CASP3		CCL4L1	SNCA		Serpinb6d		CD274		CD274		Tapbp
					USP18								IRF4	CASP4		WAS	RPL13A		Gnat3		CD38		CD38		Nup37
					WARS1								IRF5	CASP7		UBD	VAMP8		Idh2		CD69		CD69		Kpna3
													IRF6	CASP8		VPS26B	VAMP4		Zfp397		CDKN1A		CDKN1A		Sppl2a
													TRIM34	CD274		WNT5A	STX11		Cox7b		CFB		CFB		Mapk3
													IRF7	CD38		CAPG	MIR511		Sh2d1b2		CMKLR1		CMKLR1		Sumo1
													TRIM21	CD69		KIF16B	CDC42		Gjb5		CSF2RB		CSF2RB		Aaas
													NUP62	CDKN1A		MYO18A	HCK		Scube1		CXCL9		CXCL9		Arg1
													ISG20	CFB		CASP1	SLC26A6		Wdr53		FGL2		FGL2		Peli1
													RPS27A	CMKLR1		IFITM1	TP53		Slc38a6		FPR1		FPR1		Eif4e2
													NUP58	CMPK2		NR1H3	TPR		Selenov		GPR18		GPR18		Nup54
													PTAFR	CMTR1		CXCL16	SEH1L		Vsig8		GZMA		GZMA		Jak2
													TRIM6	CSF2RB		CITED1	NUP50		Ghrl		HIF1A		HIF1A		Mvp
													TRIM29	CXCL10		TDGF1	NUP85		Aldh1a2		IDO1		IDO1		Tnfaip6
													USP41	CXCL11		IFITM2	EIF4A3		Klhl23		IL10RA		IL10RA		Nfkbia
													TRIM14	CXCL9		ADAMTS13	NUP62		Gm5464		IL15RA		IL15RA		Arg2
													ADAR	DDX60		TDGF1P3	RPS27A		Tmem131		IL18BP		IL18BP		Pparg
													TRIM22	DHX58		CCL4L2	NUP58		Olfr559		IL2RB		IL2RB		Arid5b
													STAT1	EPSTI1		PPARG	USP41		Gm10573		IL6		IL6		Mthfd2
													STAT2	FGL2		MED1	NUP54		Tcl1b3		ISOC1		ISOC1		Kynu
													NUP54	FPR1		RAB20	NUP205		1700019N19Rik		ITGB7		ITGB7		Tor1b
													NUP205	GPR18		PARP14	NEDD4		Yeats2		KLRK1		KLRK1		Med1
													NEDD4	GZMA		FAS	UBA52		Cldn10		LATS2		LATS2		Trim3
													TYK2	HELZ2		FASLG	KPNA7		1700088E04Rik		LCP2		LCP2		Stxbp1
													JAK1	HERC6		CCL3L3	UBB		Rbm26		LYSMD2		LYSMD2		Pim1
													JAK2	HIF1A		AQP4	UBC		Btla		MARCHF1		MARCHF1		Nup62
													PTPN1	HLA-DMA		PIAS1	POM121		Fam174b		METTL7B		METTL7B		Tlr2
													PTPN2	IDO1		ACTR3	UBE2E1		Alkal1		MTHFD2		MTHFD2		Cfhr4
													IRF9	IFI44		ACTR2	UBE2N		5530401A14Rik		MVP		MVP		Pin1
													UBA52	IFI44L		EDN1	MIR3614		Cdhr1		NAMPT		NAMPT		Ifng
													KPNA7	IFIH1		CLDN1	NUP37		Wnk2		NCOA3		NCOA3		Ncoa3
													PTPN6	IL10RA		GSN	PIN1		Dazap1		NFKB1		NFKB1		Sell
													UBB	IL15		LGALS9	NUP210		Slit2		NFKBIA		NFKBIA		Gmpr
													UBC	IL15RA		ARG1	MIR1248		Gm36864		NOD1		NOD1		Procr
													PTPN11	IL18BP		ARG2	EIF4E3		Raver2		P2RY14		P2RY14		Cnot7
													UBA7	IL2RB		CDC37	PLCG1		Ppm1k		PDE4B		PDE4B		Tmem140
													POM121	IL4R		DNAJA3	ARIH1		Pkd2l2		PELI1		PELI1		Tent5a
													UBE2E1	IL6		NMI	NUP160		Crhr1		PFKP		PFKP		Fadd
													GBP4	IL7		PDE12	NUP153		Adamtsl1		PIM1		PIM1		Irak1
													FCGR1A	ISOC1		SLC11A1	KPNA1		Cldn34c2		PLA2G4A		PLA2G4A		Ythdf2
													FCGR1BP	ITGB7		CD86	KPNB1		Ccdc68		PNP		PNP		Dcst1
													GBP5	KLRK1		ASL	KPNA2		Fgf16		PSMA2		PSMA2		Setd2
													CIITA	LAP3		TLR2	EIF4E2		Cntrl		PSMB10		PSMB10		Lpar6
													UBE2N	LATS2		TLR3	KPNA3		Cpt1c		PSMB2		PSMB2		Lamp3
													MIR3614	LCP2		TLR4	KPNA4		Nat8f2		PTGS2		PTGS2		Lsm14a
													IFITM3	LGALS3BP		ASS1	KPNA5		Vmn1r196		RAPGEF6		RAPGEF6		Trex1
													BST2	LY6E		CD40	RANBP2		Kbtbd12		RBCK1		RBCK1		Mul1
													SUMO1	LYSMD2		CD47	RAE1		Ms4a14		RIPK1		RIPK1		Mettl3
													NUP37	MARCHF1		CD58	NUP107		Vmn1r72		RNF213		RNF213		Tbk1
													PIN1	METTL7B		OTOP1	NUP88		Tsen34		SELP		SELP		Trim56
													MID1	MTHFD2		RAB11FIP5	NUP98		Crim1		SERPING1		SERPING1		Shmt2
													NUP210	MVP		RAB7B	NUP43		Mcee		SLAMF7		SLAMF7		Ythdf3
													TRIM8	MYD88		CD74	NUP214		D6Ertd527e		SOD2		SOD2		Cav1
													IFI30	NAMPT		NUB1	NUP42		Cdk1		SPPL2A		SPPL2A		Mavs
													MIR1248	NCOA3		SNCA	POM121C		Xylt1		SRI		SRI		Ikbke
													EIF4E3	NFKB1		RPL13A	PPM1B		Csnk1a1		SSPN		SSPN		Mmp12
													PLCG1	NFKBIA		VAMP8	NUP35		Vcan		ST3GAL5		ST3GAL5		Ttll12
													ARIH1	NOD1		VAMP4	AAAS		Tacc3		ST8SIA4		ST8SIA4		Ncoa7
													TRIM38	OGFR		STX11	NDC1		Rps16		STAT3		STAT3		Ccrl2
													NUP160	P2RY14		MIR511	NUP155		Capza2		STAT4		STAT4		Elf1
													VCAM1	PARP12		CDC42	EIF4A1		4930563M21Rik		TAPBP		TAPBP		Mvb12a
													NUP153	PDE4B		HCK	EIF4A2		Cdkl4		TNFAIP2		TNFAIP2		Csf1
													IP6K2	PELI1		SLC26A6	EIF4E		Ttc36		TNFAIP3		TNFAIP3		Smpd1
													TRIM48	PFKP		TP53	EIF4G1		Csn3		TNFAIP6		TNFAIP6		Cnp
													PML	PIM1		TPR	EIF4G2		Ttll9		TNFSF10		TNFSF10		Ube2k
													KPNA1	PLA2G4A		SEH1L	NUP133		Krt76		TOR1B		TOR1B		Abce1
													KPNB1	PLSCR1		NUP50	MIR630		Fam20c		UPP1		UPP1		Mov10
													KPNA2	PNP		USP18	NUP188		Olfr382		VAMP5		VAMP5		Cactin
													EIF4E2	PNPT1		UBE2L6	NUP93		Kif20a		ZNFX1		ZNFX1		Pias4
													KPNA3	PSMA2		NUP85	MAPK3		Zc2hc1c		HLA-A				Pabpc4
													KPNA4	PSMA3		EIF4A3	EIF4G3		Lgr6		HLA-B				Slc27a1
													KPNA5	PSMB10		PSMB8	MIR5193		Bahd1		HLA-C				Pcnx
													TRIM46	PSMB2		NUP62	HERC5		Adam9		HLA-E				Ninj1
													FLNB	PSMB9		ISG20	APOL6		Olfr1253		HLA-F				Rbmx2
													RANBP2	PSME1		RPS27A	ARID5B		Tmem9		HLA-G				Lyrm2
													TRIM2	PSME2		NUP58	ARL4A		Gclc		HLA-H				Ano9
													RAE1	PTGS2		USP41	AUTS2		Bcl7b		IFI6				Olfr516
													NUP107	RAPGEF6		ADAR	BANK1		Pcyox1		IFNA10				Pcdhgb5
													CAMK2A	RBCK1		STAT2	BPGM		Ccdc188		IFNA14				Olfr1342
													CAMK2B	RIPK1		NUP54	BTG1		Hilpda		IFNA16				Plac9a
													CAMK2D	RIPK2		NUP205	C1R		Il27ra		IFNA17				Gm6268
													CAMK2G	RNF213		NEDD4	CASP3		Thtpa		IFNA21				Cnrip1
													ICAM1	RNF31		TYK2	CASP4		Fam163a		IFNA5				Asb17
													SOCS3	RTP4		PTPN1	CASP7		Bri3		IFNA7				Adam26b
													NUP88	SAMD9L		UBA52	CD274		Ogn		IFNA8				Stmnd1
													NUP98	SECTM1		KPNA7	CD38		Sp100		OAS1				Trim13
													IRF8	SELP		UBB	CD69		Cartpt		OASL				Klrg2
													TRIM31	SERPING1		UBC	CDKN1A		Prmt3		MIR21				Tmem8b
													NUP43	SLAMF7		PTPN11	CFB		Nfat5		IFIT1B				Col1a2
													IFITM1	SLC25A28		UBA7	CMKLR1		Haus5		C1S				Man2a1
													OAS1	SOD2		POM121	CSF2RB		Hdac11		GBP4				Ms4a8a
													OAS2	SP110		UBE2E1	CXCL9		Atr		IL4R				Gm20764
													OAS3	SPPL2A		UBE2N	FGL2		Nedd8		SAMD9				Hes6
													SAMHD1	SRI		MIR3614	FPR1		Aarsd1		TRIM5				Rsl1
													NUP214	SSPN		NUP37	GPR18		Dvl1		WARS1				D430041D05Rik
													IFITM2	ST3GAL5		PIN1	GZMA		Nanp		FCGR1A				Mapk1ip1
													TRIM68	ST8SIA4		NUP210	HIF1A		Tbc1d16		FCGR1B				Tmed5
													NUP42	STAT3		MIR1248	HLA-DMA		Ggnbp2		GBP1				Mndal
													POM121C	STAT4		EIF4E3	IDO1		Flvcr1		HLA-DPA1				Ephb3
													IFI27	TAP1		PLCG1	IL10RA		Pex5l		HLA-DPB1				Abcc8
													IFI35	TAPBP		ARIH1	IL15RA		Synpo		HLA-DQA1				Plce1
													IFIT2	TDRD7		NUP160	IL18BP		Cyp4f16		HLA-DQA2				Gm20741
													IFIT1	TNFAIP2		NUP153	IL2RB		Cd151		HLA-DQB1				Ddn
													PIAS1	TNFAIP3		IP6K2	IL6		Bag1		HLA-DQB2				Gpc1
													IFIT3	TNFAIP6		KPNA1	ISOC1		Gm20604		HLA-DRA				Eva1b
													IFNA1	TNFSF10		KPNB1	ITGB7		Ndufa5		HLA-DRB1				Ube2e2
													IFNA2	TOR1B		KPNA2	KLRK1		Calm3		HLA-DRB3				Baz1b
													IFNA4	TRAFD1		EIF4E2	LATS2		Ppp1r36		HLA-DRB4				Dbf4
													IFNA5	TXNIP		KPNA3	LCP2		Cts6		HLA-DRB5				Hmgn3
													TRIM5	UPP1		KPNA4	LYSMD2		Pitpnc1		MT2A				Mymx
													IFNA6	VAMP5		KPNA5	MARCHF1		Trim63		TRIM17				Pja1
													IFNA7	WARS1		RANBP2	METTL7B		Olfr1260		TRIM22				Nectin2
													TRIM3	ZBP1		RAE1	MTHFD2		Dmrta1		TRIM34				Noa1
													IFNA8	ZNFX1		NUP107	MVP		Prrt2		TRIM48				Cdk10
													IFNA10			NUP88	NAMPT		2200002J24Rik		LGALS9C				Chrne
													IFNA13			NUP98	NCOA3		Napa		EPRS1				Serpinb6d
													PPM1B			NUP43	NFKB1		Hint1		SERPINA3				Gnat3
													IFNA14			SAMHD1	NFKBIA		Myom1		IRGM				Idh2
													NUP35			NUP214	NOD1		Frg1		LGALS9B				Zfp397
													IFNA16			NUP42	P2RY14		Uba2		SIRPB1				Cox7b
													IFNA17			POM121C	PDE4B		Snap29		CFHR3				Sh2d1b2
													TRIM10			IFI27	PELI1		Ctcfl		SIRPG				Gjb5
													IFNA21			IFI35	PFKP		Vsig1		STX4				Scube1
													IFNAR1			IFIT2	PIM1		Dlx3		FCGR1BP				Wdr53
													IFNAR2			IFIT1	PLA2G4A		Pros1		SUPT5H				Slc38a6
													IFNB1			IFIT3	PNP		Prr11		XCL2				Selenov
													IFNG			IFNA1	PSMA2		Slc35e2		CCL3L1				Vsig8
													IFNGR1			IFNA2	PSMB10		As3mt		CCL13				Ghrl
													IFNGR2			IFNA4	PSMB2		Nsmf		CCL14				Aldh1a2
													TRIM45			IFNA5	PTGS2		4930564C03Rik		CCL15				Klhl23
													MT2A			IFNA6	RAPGEF6		Pnisr		CCL16				Gm5464
													AAAS			IFNA7	RBCK1		Zxdc		CCL18				Tmem131
													RSAD2			IFNA8	RIPK1		Atp6v1g2		CCL21				Olfr559
													RNASEL			IFNA10	RNF213		Olfr485		CCL23				Gm10573
													NDC1			IFNA13	SECTM1		Rgs17		CCL4L1				Tcl1b3
													NUP155			PPM1B	SELP		Parp14		TDGF1P3				1700019N19Rik
													ISG15			IFNA14	SERPING1		Smad7		CCL4L2				Yeats2
													EGR1			NUP35	SLAMF7		Olfr1402		FASLG				Cldn10
													EIF4A1			IFNA16	SOD2		Ankrd66		CCL3L3				1700088E04Rik
													EIF4A2			IFNA17	SPPL2A		Snap47		CD58				Rbm26
													TRIM17			IFNA21	SRI		Aqr		MIR511				Btla
													TRIM62			IFNAR1	SSPN		Afg1l		TP53				Fam174b
													EIF4E			IFNAR2	ST3GAL5		Stil		NUP58				Alkal1
													EIF4G1			IFNB1	ST8SIA4		Ift74		USP41				5530401A14Rik
													EIF4G2			AAAS	STAT3		Lipk		MIR3614				Cdhr1
													OASL			RSAD2	STAT4		P2ry12		MIR1248				Wnk2
													CD44			RNASEL	TAPBP		Macrod2		KPNA5				Dazap1
													NUP133			NDC1	TNFAIP2		Erbb4		NUP42				Slit2
													SOCS1			NUP155	TNFAIP3		Rps23		POM121C				Gm36864
													PRKCD			ISG15	TNFAIP6		Gm32234		MIR630				Raver2
													XAF1			EGR1	TNFSF10		Nabp2		MIR5193				Ppm1k
													MIR630			EIF4A1	TOR1B		Prrxl1		HERC5				Pkd2l2
													NUP188			EIF4A2	UPP1		Lrrc31		C1R				Crhr1
													NUP93			EIF4E	VAMP5		Smr2l		HLA-DMA				Adamtsl1
													MAPK3			EIF4G1	ZNFX1		Spta1		SECTM1				Cldn34c2
													EIF4G3			EIF4G2			Rev1						Ccdc68
													MIR5193			NUP133			Abhd1						Fgf16
													IFI6			XAF1			Cntnap5c						Cntrl
													EIF2AK2			MIR630			Hcrtr1						Cpt1c
													MX1			NUP188			Ddah1						Nat8f2
													HERC5			NUP93			Armcx6						Vmn1r196
													MX2			MAPK3			Alas2						Kbtbd12
													ADAR			EIF4G3			E130311K13Rik						Ms4a14
													APOL6			MIR5193			Bche						Vmn1r72
													ARID5B			IFI6			Tmprss9						Tsen34
													ARL4A			EIF2AK2			Cabs1						Crim1
													AUTS2			MX1			Lman1						Mcee
													B2M			HERC5			Iqcf3						D6Ertd527e
													BANK1			MX2			Slc6a3						Cdk1
													BATF2			APOL6			Olfr328						Xylt1
													BPGM			ARID5B			Dok5						Csnk1a1
													BST2			ARL4A			Mcur1						Vcan
													BTG1			AUTS2			Cplane2						Tacc3
													C1R			BANK1			Pygo1						Rps16
													C1S			BATF2			Pcdha1						Capza2
													CASP1			BPGM			Rhbdl2						4930563M21Rik
													CASP3			BTG1			Bloc1s5						Cdkl4
													CASP4			C1R			Elk1						Ttc36
													CASP7			C1S			Gyg						Csn3
													CASP8			CASP3			Ube4a						Ttll9
													CCL2			CASP4			Nscme3l						Krt76
													CCL5			CASP7			Miox						Fam20c
													CCL7			CASP8			Mcm6						Olfr382
													CD274			CD274			Rbm39						Kif20a
													CD38			CD38			Tgfb3						Zc2hc1c
													CD40			CD69			Arfgap3						Lgr6
													CD69			CDKN1A			Olfr985						Bahd1
													CD74			CFB			Vsig10l						Adam9
													CD86			CMKLR1			Carnmt1						Olfr1253
													CDKN1A			CMPK2			Tnfsf13b						Tmem9
													CFB			CMTR1			Tacc2						Gclc
													CFH			CSF2RB			Alg3						Bcl7b
													CIITA			CXCL10			Cyb5d2						Pcyox1
													CMKLR1			CXCL11			Ugp2						Ccdc188
													CMPK2			CXCL9			Mcm7						Hilpda
													CMTR1			DDX60			Pnma5						Il27ra
													CSF2RB			DHX58			Adat3						Thtpa
													CXCL10			EPSTI1			Glipr1l3						Fam163a
													CXCL11			FGL2			Myo5a						Bri3
													CXCL9			FPR1			Pkib						Ogn
													DDX58			GPR18			Nob1						Cartpt
													DDX60			GZMA			Hmgcs2						Prmt3
													DHX58			HELZ2			Tmod2						Nfat5
													EIF2AK2			HERC6			St3gal3						Haus5
													EIF4E3			HIF1A			A930018O16Rik						Hdac11
													EPSTI1			HLA-DMA			Olfr139						Atr
													FAS			IDO1			Gfer						Nedd8
													FCGR1A			IFI44			Cox14						Aarsd1
													FGL2			IFI44L			Hyls1						Dvl1
													FPR1			IFIH1			Vmn2r91						Nanp
													GBP4			IL10RA			Rplp0						Tbc1d16
													GBP6			IL15			Zfp280d						Ggnbp2
													GCH1			IL15RA			Pnmal2						Flvcr1
													GPR18			IL18BP			H2ac10						Pex5l
													GZMA			IL2RB			Dcun1d5						Synpo
													HELZ2			IL4R			Wdpcp						Cyp4f16
													HERC6			IL6			Septin12						Cd151
													HIF1A			IL7			H2-T24						Bag1
													HLA-A			ISOC1			E4f1						Gm20604
													HLA-B			ITGB7			Rpain						Ndufa5
													HLA-DMA			KLRK1			Pcmtd2						Calm3
													HLA-DQA1			LAP3			Ccdc126						Ppp1r36
													HLA-DRB1			LATS2			Ly6g						Cts6
													HLA-G			LCP2			Nrros						Pitpnc1
													ICAM1			LGALS3BP			Vmn1r46						Trim63
													IDO1			LY6E			Rxrb						Olfr1260
													IFI27			LYSMD2			Xab2						Dmrta1
													IFI30			MARCHF1			Sarnp						Prrt2
													IFI35			METTL7B			Snx22						2200002J24Rik
													IFI44			MTHFD2			Anxa10						Napa
													IFI44L			MVP			Gcat						Hint1
													IFIH1			MYD88			Gnal						Myom1
													IFIT1			NAMPT			Il1rapl1						Frg1
													IFIT2			NCOA3			Rad17						Uba2
													IFIT3			NFKB1			Kmo						Snap29
													IFITM2			NFKBIA			4932429P05Rik						Ctcfl
													IFITM3			NOD1			Rgs10						Vsig1
													IFNAR2			OGFR			Ncstn						Dlx3
													IL10RA			P2RY14			Sh2d2a						Pros1
													IL15			PARP12			Vasp						Prr11
													IL15RA			PDE4B			Rrp7a						Slc35e2
													IL18BP			PELI1			Lyg2						As3mt
													IL2RB			PFKP			Ptcd1						Nsmf
													IL4R			PIM1			Gatd1						4930564C03Rik
													IL6			PLA2G4A			Spdye4a						Pnisr
													IL7			PLSCR1			Begain						Zxdc
													IRF1			PNP			Frat2						Atp6v1g2
													IRF2			PNPT1			Rfx6						Olfr485
													IRF4			PSMA2			Rnf157						Rgs17
													IRF5			PSMA3			Tpbg						Smad7
													IRF7			PSMB10			Ppp1r13l						Olfr1402
													IRF8			PSMB2			Olfr109						Ankrd66
													IRF9			PSMB9			Foxn2						Snap47
													ISG15			PSME1			Slc29a4						Aqr
													ISG20			PSME2			Pou4f3						Afg1l
													ISOC1			PTGS2			Cutal						Stil
													ITGB7			RAPGEF6			Olfr448						Ift74
													JAK2			RBCK1			Nprl3						Lipk
													KLRK1			RIPK1			Zc3h6						P2ry12
													LAP3			RIPK2			Sh3bgrl2						Macrod2
													LATS2			RNF213			Rab3c						Erbb4
													LCP2			RNF31			Cps1						Rps23
													LGALS3BP			RTP4			Mrgprf						Gm32234
													LY6E			SAMD9L			F2rl1						Nabp2
													LYSMD2			SECTM1			Atp6v1h						Prrxl1
													MARCHF1			SELP			Pdxp						Lrrc31
													METTL7B			SERPING1			Trdmt1						Smr2l
													MT2A			SLAMF7			Bcl11a						Spta1
													MTHFD2			SLC25A28			Dhx32						Rev1
													MVP			SOD2			Efhb						Abhd1
													MX1			SP110			Kcna1						Cntnap5c
													MX2			SPPL2A			Adgrg6						Hcrtr1
													MYD88			SRI			Rims1						Ddah1
													NAMPT			SSPN			Zfand5						Armcx6
													NCOA3			ST3GAL5			Defa-rs10						Alas2
													NFKB1			ST8SIA4			Poglut1						E130311K13Rik
													NFKBIA			STAT3			Psd3						Bche
													NLRC5			STAT4			Arhgef5						Tmprss9
													NMI			TAP1			Cnbp						Cabs1
													NOD1			TAPBP			Avl9						Lman1
													NUP93			TDRD7			Ppp4r2						Iqcf3
													OAS2			TNFAIP2			Cyb5d1						Slc6a3
													OAS3			TNFAIP3			Klra2						Olfr328
													OASL			TNFAIP6			Septin10						Dok5
													OGFR			TNFSF10			Rnf5						Mcur1
													P2RY14			TOR1B			Morf4l1						Cplane2
													PARP12			TRAFD1			Fbxl22						Pygo1
													PARP14			TXNIP			Znrf4						Pcdha1
													PDE4B			UPP1			Gm17434						Rhbdl2
													PELI1			VAMP5			AU022252						Bloc1s5
													PFKP			WARS1			Nlrp6						Elk1
													PIM1			ZBP1			Mea1						Gyg
													PLA2G4A			ZNFX1			Olfr916						Ube4a
													PLSCR1						Chst10						Nscme3l
													PML						Tm4sf19						Miox
													PNP						Mlip						Mcm6
													PNPT1						Npat						Rbm39
													PSMA2						Tecta						Tgfb3
													PSMA3						BC055324						Arfgap3
													PSMB10						Camk2n2						Olfr985
													PSMB2						Slc22a29						Vsig10l
													PSMB8						Cd2bp2						Carnmt1
													PSMB9						Slmap						Tnfsf13b
													PSME1						Erp27						Tacc2
													PSME2						Ccnj						Alg3
													PTGS2						Myo10						Cyb5d2
													PTPN1						Prm2						Ugp2
													PTPN2						Shroom4						Mcm7
													PTPN6						Olfr1090						Pnma5
													RAPGEF6						Vmn2r3						Adat3
													RBCK1						Arl2						Glipr1l3
													RIPK1						Ankrd44						Myo5a
													RIPK2						Lxn						Pkib
													RNF213						Lamb2						Nob1
													RNF31						Pcsk1						Hmgcs2
													RSAD2						Fads1						Tmod2
													RTP4						Tff1						St3gal3
													SAMD9L						Ssrp1						A930018O16Rik
													SAMHD1						Rbm25						Olfr139
													SECTM1						Rap1gds1						Gfer
													SELP						Orc5						Cox14
													SERPING1						Plekhf2						Hyls1
													SLAMF7						Zbtb43						Vmn2r91
													SLC25A28						Vsnl1						Rplp0
													SOCS1						Olfr620						Zfp280d
													SOCS3						Dtx4						Pnmal2
													SOD2						Lhpp						H2ac10
													SP110						Nop58						Dcun1d5
													SPPL2A						Phactr1						Wdpcp
													SRI						Plekhm1						Septin12
													SSPN						Mif						H2-T24
													ST3GAL5						Prrc2a						E4f1
													ST8SIA4						Ppp2r2c						Rpain
													STAT1						Kcne2						Pcmtd2
													STAT2						Clnk						Ccdc126
													STAT3						Cyp2j9						Ly6g
													STAT4						Baz2a						Nrros
													TAP1						Ndst3						Vmn1r46
													TAPBP						Eral1						Rxrb
													TDRD7						Olfr532						Xab2
													TNFAIP2						Ankrd63						Sarnp
													TNFAIP3						Golm2						Snx22
													TNFAIP6						Tnfrsf23						Anxa10
													TNFSF10						Cenpf						Gcat
													TOR1B						Ticrr						Gnal
													TRAFD1						Scaper						Il1rapl1
													TRIM14						Cd300lg						Rad17
													TRIM21						Ctsm						Kmo
													TRIM25						Mdm2						4932429P05Rik
													TRIM26						Slc16a14						Rgs10
													TXNIP						Upk1a						Ncstn
													UBE2L6						Snx33						Sh2d2a
													UPP1						Rab3gap1						Vasp
													USP18						Abhd14b						Rrp7a
													VAMP5						Asic5						Lyg2
													VAMP8						Ripply2						Ptcd1
													VCAM1						Zfp59						Gatd1
													WARS1						Micos10						Spdye4a
													XAF1						Hkdc1						Begain
													XCL1						Gad1						Frat2
													ZBP1						P4hb						Rfx6
													ZNFX1						Gba						Rnf157
																			Fat2						Tpbg
																			Mroh2b						Ppp1r13l
																			Zfp429						Olfr109
																			Ankrd34a						Foxn2
																			Sike1						Slc29a4
																			Trappc6b						Pou4f3
																			Kdm4c						Cutal
																			Grifin						Olfr448
																			Btbd35f1						Nprl3
																			Oxt						Zc3h6
																			Tsg101						Sh3bgrl2
																			Slc17a7						Rab3c
																			Ptprf						Cps1
																			Ncaph2						Mrgprf
																			Ctbp1						F2rl1
																			Dmac2l						Atp6v1h
																			Piezo2						Pdxp
																			Cort						Trdmt1
																			Fam110a						Bcl11a
																			Scn9a						Dhx32
																			Sbspon						Efhb
																			Aip						Kcna1
																			Ebpl						Adgrg6
																			Maco1						Rims1
																			Clec12b						Zfand5
																			Cep41						Defa-rs10
																			Oaz3						Poglut1
																			Tmem241						Psd3
																			Fam149a						Arhgef5
																			Olfr1160						Cnbp
																			Klhl12						Avl9
																			Vmn1r206						Ppp4r2
																			Krt77						Cyb5d1
																			Lpar1						Klra2
																			Tnfrsf19						Septin10
																			Plag1						Rnf5
																			Cfap77						Morf4l1
																			Yif1a						Fbxl22
																			Afg3l1						Znrf4
																			Fam163b						Gm17434
																			Dnaaf8						AU022252
																			Scgb1b30						Nlrp6
																			Bid						Mea1
																			Tor4a						Olfr916
																			Mmp1a						Chst10
																			Olfr504						Tm4sf19
																			Efna1						Mlip
																			Tm7sf2						Npat
																			Tac2						Tecta
																			Rpap3						BC055324
																			Olfr1256						Camk2n2
																			Uhmk1						Slc22a29
																			Cfap44						Cd2bp2
																			Slc38a9						Slmap
																			Smc5						Erp27
																			Ifnb1						Ccnj
																			Srrm2						Myo10
																			Krt79						Prm2
																			Gp1ba						Shroom4
																			Ctrb1						Olfr1090
																			Mro						Vmn2r3
																			Sp3						Arl2
																			Insl5						Ankrd44
																			Rasgrp3						Lxn
																			Hspa8						Lamb2
																			Met						Pcsk1
																			Cidea						Fads1
																			Gata1						Tff1
																			Yme1l1						Ssrp1
																			Aadacl2fm1						Rbm25
																			Mnd1						Rap1gds1
																			Gtf2b						Orc5
																			Pafah1b1						Plekhf2
																			Serpina5						Zbtb43
																			Cyp2e1						Vsnl1
																			Zfp180						Olfr620
																			Tex28						Dtx4
																			Myct1						Lhpp
																			Ddx41						Nop58
																			Dusp14						Phactr1
																			Cenpo						Plekhm1
																			Ddrgk1						Mif
																			Fam155a						Prrc2a
																			Fancl						Ppp2r2c
																			Prpf38a						Kcne2
																			Usp3						Clnk
																			Kcnq1						Cyp2j9
																			Msl3						Baz2a
																			Gpr150						Ndst3
																			Nkx6-2						Eral1
																			Nicn1						Olfr532
																			Rfc4						Ankrd63
																			Oog4						Golm2
																			Slc25a11						Tnfrsf23
																			Gli3						Cenpf
																			Fam222a						Ticrr
																			P3h2						Scaper
																			Prrg3						Cd300lg
																			Gys1						Ctsm
																			Pcdha10						Mdm2
																			Ciapin1						Slc16a14
																			Spata13						Upk1a
																			Olfr330						Snx33
																			Haus2						Rab3gap1
																			Carns1						Abhd14b
																			Hs2st1						Asic5
																			Adamtsl5						Ripply2
																			Rell2						Zfp59
																			Akt3						Micos10
																			1700024G13Rik						Hkdc1
																			9930111J21Rik1						Gad1
																			Ttc23l						P4hb
																			Xkr8						Gba
																			Fgg						Fat2
																			Nprl2						Mroh2b
																			Katnal2						Zfp429
																			Mfap3						Ankrd34a
																			Mapk8ip3						Sike1
																			Cyb5r3						Trappc6b
																			Olfm1						Kdm4c
																			Mcm9						Grifin
																			Efcab15						Btbd35f1
																			Pak6						Oxt
																			Tll1						Tsg101
																			Lfng						Slc17a7
																			C2cd3						Ptprf
																			Tecrl						Ncaph2
																			Ier2						Ctbp1
																			Rpl6						Dmac2l
																			Ocln						Piezo2
																			Ubfd1						Cort
																			Rhox9						Fam110a
																			Dync1i2						Scn9a
																			Rasa2						Sbspon
																			Fbrsl1						Aip
																			Idi1						Ebpl
																			Wdr4						Maco1
																			Rnf13						Clec12b
																			Cilk1						Cep41
																			Actl9						Oaz3
																			Tm4sf5						Tmem241
																			St6galnac1						Fam149a
																			Obox1						Olfr1160
																			Myh3						Klhl12
																			P2rx3						Vmn1r206
																			Olfr874						Krt77
																			Igsf23						Lpar1
																			Ahcy						Tnfrsf19
																			Zfp384						Plag1
																			Spink8						Cfap77
																			Fundc1						Yif1a
																			Olfr450						Afg3l1
																			Sbp						Fam163b
																			Mak						Dnaaf8
																			Kifc2						Scgb1b30
																			Unc45a						Bid
																			Ssna1						Tor4a
																			Dnah1						Mmp1a
																			Sephs2						Olfr504
																			Slit3						Efna1
																			Dusp8						Tm7sf2
																			Aldoart1						Tac2
																			Acbd4						Rpap3
																			Cst7						Olfr1256
																			Mslnl						Uhmk1
																			Lmo3						Cfap44
																			Notum						Slc38a9
																			9430038I01Rik						Smc5
																			Hoxb9						Srrm2
																			Dnajb3						Krt79
																			Sult2a8						Gp1ba
																			Sart1						Ctrb1
																			Col15a1						Mro
																			Eif2b1						Sp3
																			Cdc42bpa						Insl5
																			Olfr1093						Rasgrp3
																			Chd1l						Hspa8
																			Tnfrsf13c						Met
																			Slc25a24						Cidea
																			Cfap47						Gata1
																			Tnnc2						Yme1l1
																			Ephx2						Aadacl2fm1
																			Slc28a1						Mnd1
																			Olfr25						Gtf2b
																			Gsg1l						Pafah1b1
																			Ppp1r10						Serpina5
																			Pnkp						Cyp2e1
																			Pqbp1						Zfp180
																			Fxr1						Tex28
																			Tcp1						Myct1
																			Ankrd11						Ddx41
																			Foxred2						Dusp14
																			Muc21						Cenpo
																			Nfasc						Ddrgk1
																			Mblac1						Fam155a
																			Calcr						Fancl
																			Abhd3						Prpf38a
																			Gigyf1						Usp3
																			Olfr738						Kcnq1
																			Ttc39a						Msl3
																			Gng3						Gpr150
																			Ovol3						Nkx6-2
																			Urm1						Nicn1
																			Gm9831						Rfc4
																			Ankub1						Oog4
																			Amelx						Slc25a11
																			Ndufb3						Gli3
																			Rbpms2						Fam222a
																			Olfr1061						P3h2
																			Cnn3						Prrg3
																			Pycrl						Gys1
																			Fam243						Pcdha10
																			Ino80d						Ciapin1
																			Ceacam20						Spata13
																			Sun1						Olfr330
																			Olfr1179						Haus2
																			Pwwp3b						Carns1
																			Psmb4						Hs2st1
																			Pcdhb17						Adamtsl5
																			Myh15						Rell2
																			Slc2a4						Akt3
																			Klhdc8b						1700024G13Rik
																			Tepp						9930111J21Rik1
																			Zfp738						Ttc23l
																			Magea9						Xkr8
																			Pigg						Fgg
																			Acvr1c						Nprl2
																			Clmp						Katnal2
																			Setd3						Mfap3
																			C1ql2						Mapk8ip3
																			Dgcr2						Cyb5r3
																			Ncf2						Olfm1
																			Ank						Mcm9
																			Sh3rf2						Efcab15
																			Atp6ap1						Pak6
																			Cpne8						Tll1
																			Npsr1						Lfng
																			Hspbp1						C2cd3
																			Fabp9						Tecrl
																			Uqcrc2						Ier2
																			Slfn5						Rpl6
																			Mc1r						Ocln
																			Commd6						Ubfd1
																			Nlrp9a						Rhox9
																			Glp2r						Dync1i2
																			B3gnt2						Rasa2
																			Olfr536						Fbrsl1
																			Parpbp						Idi1
																			Thbd						Wdr4
																			Pou3f2						Rnf13
																			Aldh16a1						Cilk1
																			Cntrob						Actl9
																			Oosp3						Tm4sf5
																			Ngfr						St6galnac1
																			Sh3bgr						Obox1
																			Shc4						Myh3
																			Kdm4a						P2rx3
																			Gprc6a						Olfr874
																			Vmn1r120						Igsf23
																			Prdm14						Ahcy
																			Olfr1427						Zfp384
																			Dync1i1						Spink8
																			Ankrd13d						Fundc1
																			Epha3						Olfr450
																			Ttc9						Sbp
																			Smg7						Mak
																			Olfr161						Kifc2
																			Plp2						Unc45a
																			Ctnna1						Ssna1
																			Arf6						Dnah1
																			Gm11565						Sephs2
																			Mpp3						Slit3
																			Tmco6						Dusp8
																			Gsdmc3						Aldoart1
																			Cldn34b1						Acbd4
																			Olfr632						Cst7
																			Rab10						Mslnl
																			Gpr83						Lmo3
																			Sertm1						Notum
																			Gm31679						9430038I01Rik
																			Parg						Hoxb9
																			Fhl2						Dnajb3
																			Ubn1						Sult2a8
																			Cryba2						Sart1
																			P3h4						Col15a1
																			Sertad2						Eif2b1
																			Iqcd						Cdc42bpa
																			Strc						Olfr1093
																			Yipf2						Chd1l
																			Nelfcd						Tnfrsf13c
																			Wnt6						Slc25a24
																			Coprs						Cfap47
																			Serac1						Tnnc2
																			Saysd1						Ephx2
																			Apof						Slc28a1
																			Olfr1181						Olfr25
																			Slc46a3						Gsg1l
																			Sema4d						Ppp1r10
																			Tmem198b						Pnkp
																			Rps6ka1						Pqbp1
																			Cct3						Fxr1
																			Mks1						Tcp1
																			Aldh6a1						Ankrd11
																			Tff3						Foxred2
																			Supt16						Muc21
																			Clptm1						Nfasc
																			Tvp23b						Mblac1
																			Sphk2						Calcr
																			Glipr1l2						Abhd3
																			Mfsd1						Gigyf1
																			Ccdc192						Olfr738
																			Defb4						Ttc39a
																			Satl1						Gng3
																			Taf7l						Ovol3
																			Lyrm4						Urm1
																			Duox1						Gm9831
																			Lrrtm3						Ankub1
																			Klrc2						Amelx
																			Erich1						Ndufb3
																			Sp110						Rbpms2
																			Map6d1						Olfr1061
																			Olfr591						Cnn3
																			Pip5k1a						Pycrl
																			Olfr6						Fam243
																			Phc2						Ino80d
																			Bach2						Ceacam20
																			Prkn						Sun1
																			Shisa8						Olfr1179
																			Syn1						Pwwp3b
																			Spata18						Psmb4
																			Ahctf1						Pcdhb17
																			Proc						Myh15
																			Klhl24						Slc2a4
																			Fbln2						Klhdc8b
																			Phactr2						Tepp
																			Nudt16l2						Zfp738
																			Plekhg6						Magea9
																			Samt3						Pigg
																			Gfi1b						Acvr1c
																			Vmn2r56						Clmp
																			Psat1						Setd3
																			Atp5md						C1ql2
																			Gm3893						Dgcr2
																			Polr1b						Ncf2
																			Atxn7l3						Ank
																			Coro1a						Sh3rf2
																			Rab38						Atp6ap1
																			Gabarapl1						Cpne8
																			Tnxb						Npsr1
																			Prodh						Hspbp1
																			Tiprl						Fabp9
																			Dctn6						Uqcrc2
																			2310057M21Rik						Slfn5
																			Dusp26						Mc1r
																			Rybp						Commd6
																			Prss12						Nlrp9a
																			Ehmt1						Glp2r
																			Polb						B3gnt2
																			Satb1						Olfr536
																			Cnnm1						Parpbp
																			Smg1						Thbd
																			Usf1						Pou3f2
																			Ddost						Aldh16a1
																			Adat1						Cntrob
																			Cnn2						Oosp3
																			Ndufc1						Ngfr
																			Nkapd1						Sh3bgr
																			Sp2						Shc4
																			Gm46901						Kdm4a
																			Lrtm1						Gprc6a
																			Vmn2r105						Vmn1r120
																			Pclo						Prdm14
																			Mmadhc						Olfr1427
																			Asz1						Dync1i1
																			Relb						Ankrd13d
																			Scyl1						Epha3
																			Ubqln3						Ttc9
																			Cox11						Smg7
																			Olfr52						Olfr161
																			Crcp						Plp2
																			Usp39						Ctnna1
																			Emsy						Arf6
																			Slc1a6						Gm11565
																			Prickle1						Mpp3
																			Gabrr2						Tmco6
																			Vmn2r18						Gsdmc3
																			Hdac8						Cldn34b1
																			C1qtnf1						Olfr632
																			Rxfp3						Rab10
																			Mtx1						Gpr83
																			Cmtr2						Sertm1
																			Taf5l						Gm31679
																			Asap1						Parg
																			Zfp809						Fhl2
																			Echdc2						Ubn1
																			Bbs9						Cryba2
																			Wnt9b						P3h4
																			Rwdd2a						Sertad2
																			Zfp184						Iqcd
																			Lmx1b						Strc
																			Tbcc						Yipf2
																			Erc1						Nelfcd
																			Nrip3						Wnt6
																			Gap43						Coprs
																			Fnbp1						Serac1
																			Wdr45						Saysd1
																			Srrm1						Apof
																			Clk4						Olfr1181
																			Als2cl						Slc46a3
																			Med27						Sema4d
																			Micos13						Tmem198b
																			Mfsd2a						Rps6ka1
																			Mlx						Cct3
																			Gm11562						Mks1
																			Krtap15						Aldh6a1
																			Acot10						Tff3
																			Krtap4-9						Supt16
																			Pik3c2a						Clptm1
																			Rarg						Tvp23b
																			Esd						Sphk2
																			Mcam						Glipr1l2
																			Rbm47						Mfsd1
																			Ces1g						Ccdc192
																			Olfr750						Defb4
																			Crip2						Satl1
																			Bcat2						Taf7l
																			Smim26						Lyrm4
																			Gpr25						Duox1
																			Fstl4						Lrrtm3
																			Ptges						Klrc2
																			1700092M07Rik						Erich1
																			Gdf10						Map6d1
																			Larp1						Olfr591
																			Trmt1						Pip5k1a
																			Pax6						Olfr6
																			Sorcs2						Phc2
																			Bcl7a						Bach2
																			Them4						Prkn
																			Rspo2						Shisa8
																			Peli2						Syn1
																			Sfmbt1						Spata18
																			Chdh						Ahctf1
																			Tnp2						Proc
																			C1qtnf12						Klhl24
																			Ifitm1						Fbln2
																			Caprin2						Phactr2
																			Gm52009						Nudt16l2
																			Sgpp1						Plekhg6
																			Pmch						Samt3
																			Snx9						Gfi1b
																			Fam161b						Vmn2r56
																			Gng8						Psat1
																			Lat						Atp5md
																			Olfr78						Gm3893
																			Ankrd17						Polr1b
																			Prss45						Atxn7l3
																			Cdc6						Coro1a
																			Slc22a13						Rab38
																			Sos2						Gabarapl1
																			Phf1						Tnxb
																			Nalcn						Prodh
																			6430571L13Rik						Tiprl
																			Ddx17						Dctn6
																			2200002D01Rik						2310057M21Rik
																			Igsf11						Dusp26
																			Atg16l1						Rybp
																			Slc35a1						Prss12
																			Snx7						Ehmt1
																			Tmem165						Polb
																			Marchf11						Satb1
																			Plppr3						Cnnm1
																			Slc10a6						Smg1
																			Slc39a6						Usf1
																			Gstt3						Ddost
																			Gpr87						Adat1
																			Katnip						Cnn2
																			Gpr61						Ndufc1
																			Olfr995						Nkapd1
																			Krtap11-1						Sp2
																			Nif3l1						Gm46901
																			Nell1						Lrtm1
																			Fam240a						Vmn2r105
																			Cnksr2						Pclo
																			Tmem167						Mmadhc
																			Gpn3						Asz1
																			Ghsr						Relb
																			H2-Ob						Scyl1
																			Ska2						Ubqln3
																			Cfd						Cox11
																			Olfr1002						Olfr52
																			Gm3561						Crcp
																			Slc6a13						Usp39
																			Ecd						Emsy
																			Myo1e						Slc1a6
																			Fzd1						Prickle1
																			Pla2g4d						Gabrr2
																			Zfp28						Vmn2r18
																			Tmprss11g						Hdac8
																			Fam71b						C1qtnf1
																			Pudp						Rxfp3
																			Ccdc122						Mtx1
																			Shroom1						Cmtr2
																			Defb1						Taf5l
																			Klrc1						Asap1
																			Ralgps1						Zfp809
																			Shcbp1l						Echdc2
																			Defa2						Bbs9
																			Ano7						Wnt9b
																			Ugt1a6b						Rwdd2a
																			Olfr551						Zfp184
																			Gm8251						Lmx1b
																			Unc13b						Tbcc
																			Cenpj						Erc1
																			Chm						Nrip3
																			Pcp4l1						Gap43
																			Tcf25						Fnbp1
																			Hexim1						Wdr45
																			Mblac2						Srrm1
																			Arid3c						Clk4
																			Pea15a						Als2cl
																			Atp5o						Med27
																			Il27						Micos13
																			Samt2						Mfsd2a
																			Gpatch1						Mlx
																			Iglc1						Gm11562
																			Mtcl1						Krtap15
																			Osbpl9						Acot10
																			Gtpbp3						Krtap4-9
																			Gipr						Pik3c2a
																			Lypla1						Rarg
																			Snapc3						Esd
																			4932411N23Rik						Mcam
																			Ugt1a8						Rbm47
																			Tm4sf20						Ces1g
																			Lce1g						Olfr750
																			Slc2a13						Crip2
																			Tmtc3						Bcat2
																			Coa6						Smim26
																			Pld5						Gpr25
																			Olfr507						Fstl4
																			Letm2						Ptges
																			Tbx5						1700092M07Rik
																			Pdk3						Gdf10
																			Mfsd13b						Larp1
																			Nhlh2						Trmt1
																			2610524H06Rik						Pax6
																			Spidr						Sorcs2
																			Ccdc157						Bcl7a
																			Glrp1						Them4
																			Vps45						Rspo2
																			Stx12						Peli2
																			Kif17						Sfmbt1
																			Pnpla6						Chdh
																			Kmt5b						Tnp2
																			Agfg2						C1qtnf12
																			Gabpa						Caprin2
																			Amn1						Gm52009
																			Gm17455						Sgpp1
																			Tbc1d7						Pmch
																			Mrpl47						Snx9
																			Trappc9						Fam161b
																			Crtc3						Gng8
																			Gpat4						Lat
																			Kdm3b						Olfr78
																			Abhd6						Ankrd17
																			Lamc2						Prss45
																			Prdm4						Cdc6
																			Tas2r110						Slc22a13
																			Stbd1						Sos2
																			Rpl35						Phf1
																			Creld1						Nalcn
																			Fes						6430571L13Rik
																			Camk1g						Ddx17
																			Myo1a						2200002D01Rik
																			Gm10209						Igsf11
																			4930455H04Rik						Atg16l1
																			Chil1						Slc35a1
																			Trerf1						Snx7
																			Vmn1r188						Tmem165
																			Sec22b						Marchf11
																			Prm3						Plppr3
																			BC024978						Slc10a6
																			Flt1						Slc39a6
																			Zfp607a						Gstt3
																			Rfc5						Gpr87
																			Ndufs5						Katnip
																			Cstl1						Gpr61
																			Vegfd						Olfr995
																			Cycs						Krtap11-1
																			Smok2a						Nif3l1
																			Vstm2a						Nell1
																			Rabggta						Fam240a
																			Xpo6						Cnksr2
																			Nolc1						Tmem167
																			Astn2						Gpn3
																			Suclg2						Ghsr
																			Tmcc1						H2-Ob
																			Timm8a2						Ska2
																			Pcdhga2						Cfd
																			Ndufaf5						Olfr1002
																			Hrh1						Gm3561
																			Vinac1						Slc6a13
																			Slk						Ecd
																			Doxl1						Myo1e
																			Pick1						Fzd1
																			1700013G24Rik						Pla2g4d
																			Tubgcp5						Zfp28
																			Uba7						Tmprss11g
																			Olfr432						Fam71b
																			Mcemp1						Pudp
																			Golga7						Ccdc122
																			Mrps18c						Shroom1
																			Klk12						Defb1
																			Tmem134						Klrc1
																			Mrgpra3						Ralgps1
																			Fetub						Shcbp1l
																			Cdk5rap3						Defa2
																			Bnip3l						Ano7
																			Rpia						Ugt1a6b
																			Slc29a3						Olfr551
																			Adgrf5						Gm8251
																			Kif14						Unc13b
																			Mier2						Cenpj
																			Mrps6						Chm
																			Galnt7						Pcp4l1
																			Spa17						Tcf25
																			Apc2						Hexim1
																			Lcn9						Mblac2
																			Zfp653						Arid3c
																			Olfr1383						Pea15a
																			Rph3a						Atp5o
																			Cdh1						Il27
																			Acsf3						Samt2
																			Dhrs4						Gpatch1
																			Olfr149						Iglc1
																			Snf8						Mtcl1
																			Rprml						Osbpl9
																			Hsph1						Gtpbp3
																			Mettl4						Gipr
																			Fbxl21						Lypla1
																			Ier3						Snapc3
																			Kdsr						4932411N23Rik
																			1700029J07Rik						Ugt1a8
																			Srgap1						Tm4sf20
																			Msh5						Lce1g
																			Ackr3						Slc2a13
																			Mtg2						Tmtc3
																			Gna12						Coa6
																			Rbbp5						Pld5
																			Gm3696						Olfr507
																			Olfr684						Letm2
																			Glul						Tbx5
																			Atp7a						Pdk3
																			Nid1						Mfsd13b
																			Skint10						Nhlh2
																			Trpm8						2610524H06Rik
																			Gphb5						Spidr
																			Mpv17l2						Ccdc157
																			Car2						Glrp1
																			Isx						Vps45
																			Rpl17						Stx12
																			Enho						Kif17
																			4930402K13Rik						Pnpla6
																			Hpgds						Kmt5b
																			Ddr1						Agfg2
																			Cnot6l						Gabpa
																			Prkar1b						Amn1
																			Prl3c1						Gm17455
																			Zfp410						Tbc1d7
																			Serpina7						Mrpl47
																			Gm10267						Trappc9
																			Cd209b						Crtc3
																			Apobec4						Gpat4
																			Nkx2-6						Kdm3b
																			Olfr1231						Abhd6
																			Slc30a6						Lamc2
																			Zmym5						Prdm4
																			Skap2						Tas2r110
																			Prr18						Stbd1
																			Gdpd4						Rpl35
																			Zfp735						Creld1
																			Odc1						Fes
																			Arhgap12						Camk1g
																			F7						Myo1a
																			Rgs16						Gm10209
																			Rpf1						4930455H04Rik
																			Gm52217						Chil1
																			D17H6S53E						Trerf1
																			Ifi47						Vmn1r188
																			Bcar3						Sec22b
																			Ptn						Prm3
																			Me3						BC024978
																			Smarca2						Flt1
																			Eipr1						Zfp607a
																			Bin1						Rfc5
																			Zpld2						Ndufs5
																			Med8						Cstl1
																			Cxcl11						Vegfd
																			Cyb5a						Cycs
																			Tamm41						Smok2a
																			Hemk1						Vstm2a
																			Nnt						Rabggta
																			Csrp2						Xpo6
																			Olfr618						Nolc1
																			Kctd12b						Astn2
																			Amph						Suclg2
																			Tnfsf14						Tmcc1
																			Olfr132						Timm8a2
																			Pnlip						Pcdhga2
																			Tmc1						Ndufaf5
																			Tcf24						Hrh1
																			Tgfbr2						Vinac1
																			Esp3						Slk
																			Sprr2d						Doxl1
																			Ccsap						Pick1
																			Rps15						1700013G24Rik
																			Lrrtm4						Tubgcp5
																			Cyren						Olfr432
																			St6galnac4						Mcemp1
																			Olfr1056						Golga7
																			Myo1h						Mrps18c
																			Mdh2						Klk12
																			Arl1						Tmem134
																			Igsf6						Mrgpra3
																			Rnf151						Fetub
																			Eomes						Cdk5rap3
																			Gm30302						Bnip3l
																			Pik3r3						Rpia
																			Nt5c1b						Slc29a3
																			Adam29						Adgrf5
																			P2ry4						Kif14
																			Cltb						Mier2
																			Zbtb11						Mrps6
																			Tbc1d10c						Galnt7
																			Rnf170						Spa17
																			Onecut3						Apc2
																			Lrig1						Lcn9
																			Polr1a						Zfp653
																			Bloc1s2						Olfr1383
																			Gm11555						Rph3a
																			Trip11						Cdh1
																			Mgst1						Acsf3
																			Phf6						Dhrs4
																			Card10						Olfr149
																			Mdp1						Snf8
																			Dars2						Rprml
																			Tnfrsf11b						Hsph1
																			Slc9a4						Mettl4
																			Fblim1						Fbxl21
																			Zfp7						Ier3
																			Creb1						Kdsr
																			Olfr570						1700029J07Rik
																			Scml2						Srgap1
																			Kti12						Msh5
																			Zbtb5						Ackr3
																			Htr4						Mtg2
																			Wif1						Gna12
																			Pfkl						Rbbp5
																			4921507P07Rik						Gm3696
																			Sgpl1						Olfr684
																			Klri1						Glul
																			Trappc4						Atp7a
																			Serinc1						Nid1
																			Gm52562						Skint10
																			Asb1						Trpm8
																			Trappc11						Gphb5
																			Fpr2						Mpv17l2
																			Bmp3						Car2
																			Gm3625						Isx
																			Tmem185a						Rpl17
																			Adcy5						Enho
																			Hunk						4930402K13Rik
																			Top2a						Hpgds
																			Kank1						Ddr1
																			Capn11						Cnot6l
																			Mageb6b1						Prkar1b
																			St18						Prl3c1
																			Ssu72						Zfp410
																			Pnrc2						Serpina7
																			Zfp395						Gm10267
																			Ms4a10						Cd209b
																			Gpx4						Apobec4
																			Hamp2						Nkx2-6
																			Syt13						Olfr1231
																			Rgma						Slc30a6
																			Tedc1						Zmym5
																			BC028528						Skap2
																			Cenpc1						Prr18
																			Olfr1112						Gdpd4
																			Bbs1						Zfp735
																			Sgf29						Odc1
																			Prss58						Arhgap12
																			Olfr1444						F7
																			Sgip1						Rgs16
																			Pm20d1						Rpf1
																			Ndfip2						Gm52217
																			Alx4						D17H6S53E
																			Zfp458						Ifi47
																			Gm30733						Bcar3
																			Sox4						Ptn
																			Hlf						Me3
																			Cited4						Smarca2
																			Tmem89						Eipr1
																			Nfia						Bin1
																			Naalad2						Zpld2
																			Fgf22						Med8
																			Zfp141						Cyb5a
																			Psme4						Tamm41
																			Odad4						Hemk1
																			Chchd6						Nnt
																			Olig1						Csrp2
																			Ccnl2						Olfr618
																			Uhrf1						Kctd12b
																			Prokr2						Amph
																			Prss16						Tnfsf14
																			Zfp759						Olfr132
																			Olfr228						Pnlip
																			Ano3						Tmc1
																			Prl8a6						Tcf24
																			Tex13c3						Tgfbr2
																			Lamb1						Esp3
																			Cep350						Sprr2d
																			Olfr826						Ccsap
																			Chmp3						Rps15
																			Bace1						Lrrtm4
																			Acap1						Cyren
																			Ipp						St6galnac4
																			1810046K07Rik						Olfr1056
																			Gm41958						Myo1h
																			Des						Mdh2
																			Lzic						Arl1
																			Flt4						Igsf6
																			Triqk						Rnf151
																			Cdt1						Eomes
																			Gpcpd1						Gm30302
																			Cdh26						Pik3r3
																			Dars						Nt5c1b
																			Fam160b2						Adam29
																			Zfp57						P2ry4
																			Poc1a						Cltb
																			Gm36210						Zbtb11
																			Retn						Tbc1d10c
																			Ankrd36						Rnf170
																			Pla2g10						Onecut3
																			Ms4a4c						Lrig1
																			Abi3bp						Polr1a
																			Gm1141						Bloc1s2
																			Lrrc34						Gm11555
																			Bzw2						Trip11
																			Aven						Mgst1
																			Gpr174						Phf6
																			Phox2b						Card10
																			Olfr619						Mdp1
																			Zfp60						Dars2
																			Myl12a						Tnfrsf11b
																			Tlx2						Slc9a4
																			Trak2						Fblim1
																			Gm1043						Zfp7
																			Oxct1						Creb1
																			Ap2s1						Olfr570
																			Bmp2k						Scml2
																			Hdac3						Kti12
																			5730522E02Rik						Zbtb5
																			Pclaf						Htr4
																			Olfr549						Wif1
																			Pcdhac2						Pfkl
																			Mthfd1						4921507P07Rik
																			Dut						Sgpl1
																			Dscaml1						Klri1
																			Bfsp1						Trappc4
																			Cebpzos						Serinc1
																			Cage1						Gm52562
																			Slc6a11						Asb1
																			Rragc						Trappc11
																			Tcap						Fpr2
																			Caap1						Bmp3
																			Lsm12						Gm3625
																			Pls3						Tmem185a
																			Abra						Adcy5
																			Trp53inp2						Hunk
																			Hdac7						Top2a
																			Fam53b						Kank1
																			Lrrc10b						Capn11
																			Tsacc						Mageb6b1
																			Pym1						St18
																			Gtf2ird1						Ssu72
																			Kcnj2						Pnrc2
																			Emc10						Zfp395
																			Marchf9						Ms4a10
																			Klra21						Gpx4
																			Hsf2						Hamp2
																			Htr3b						Syt13
																			Mrgprd						Rgma
																			Orc2						Tedc1
																			Dppa3						BC028528
																			Slc19a3						Cenpc1
																			Hus1						Olfr1112
																			Prkag3						Bbs1
																			Smim13						Sgf29
																			Ms4a4a						Prss58
																			Tatdn2						Olfr1444
																			Ctrc						Sgip1
																			Pcyox1l						Pm20d1
																			4930579G24Rik						Ndfip2
																			Lrfn5						Alx4
																			Zp1						Zfp458
																			1500009L16Rik						Gm30733
																			Oga						Sox4
																			Ap4e1						Hlf
																			Lcn4						Cited4
																			Il21						Tmem89
																			Ldlrad1						Nfia
																			H2ac18						Naalad2
																			Snapin						Fgf22
																			Stard3						Zfp141
																			Plekhj1						Psme4
																			Ufm1						Odad4
																			Cyp7a1						Chchd6
																			Prl7d1						Olig1
																			Pfdn1						Ccnl2
																			Ubqln4						Uhrf1
																			Taf7l2						Prokr2
																			Sirt6						Prss16
																			Atp6v1c1						Zfp759
																			Gla						Olfr228
																			Inka1						Ano3
																			Gsdma						Prl8a6
																			Trmt9b						Tex13c3
																			Pla2g1b						Lamb1
																			Arl3						Cep350
																			Kbtbd7						Olfr826
																			Lrig2						Chmp3
																			Cutc						Bace1
																			Ly6e						Acap1
																			Myl3						Ipp
																			Terf1						1810046K07Rik
																			Morf4l2						Gm41958
																			A3galt2						Des
																			Kcnmb2						Lzic
																			Ints1						Flt4
																			Proca1						Triqk
																			Mphosph6						Cdt1
																			Cxcl10						Gpcpd1
																			Tvp23a						Cdh26
																			Scn7a						Dars
																			BC034090						Fam160b2
																			Evi2a						Zfp57
																			Galnt6						Poc1a
																			Fam76b						Gm36210
																			Vdac1						Retn
																			Rhno1						Ankrd36
																			Strit1						Pla2g10
																			Nsun3						Ms4a4c
																			Klhl35						Abi3bp
																			Mst1r						Gm1141
																			Panx2						Lrrc34
																			Il23a						Bzw2
																			Cryab						Aven
																			Akr1c20						Gpr174
																			Mroh2a						Phox2b
																			Ccdc83						Olfr619
																			Prtg						Zfp60
																			Inafm2						Myl12a
																			Arfgef2						Tlx2
																			Lrrc8b						Trak2
																			Scgb1b27						Gm1043
																			Ppp1r16b						Oxct1
																			Ndst2						Ap2s1
																			Ptprd						Bmp2k
																			Omt2a						Hdac3
																			Jph2						5730522E02Rik
																			Lrrn2						Pclaf
																			Notch2						Olfr549
																			Kcng2						Pcdhac2
																			Kctd12						Mthfd1
																			Sox2						Dut
																			Rnf126						Dscaml1
																			Spint5						Bfsp1
																			Insc						Cebpzos
																			Potegl						Cage1
																			Olfr168						Slc6a11
																			Fzd10						Rragc
																			Btaf1						Tcap
																			Sv2c						Caap1
																			Sclt1						Lsm12
																			Mab21l4						Pls3
																			Mink1						Abra
																			Tex14						Trp53inp2
																			Cops7a						Hdac7
																			Dact2						Fam53b
																			Olfr198						Lrrc10b
																			Ptchd4						Tsacc
																			Stim2						Pym1
																			Olfr1418						Gtf2ird1
																			Fbxl2						Kcnj2
																			Letmd1						Emc10
																			Olfr45						Marchf9
																			Nps						Klra21
																			Samd11						Hsf2
																			Ces1c						Htr3b
																			Csn1s1						Mrgprd
																			Cyth2						Orc2
																			Bcl3						Dppa3
																			Ston2						Slc19a3
																			Olfr1044						Hus1
																			Olfr1100						Prkag3
																			Apbb2						Smim13
																			Hs3st2						Ms4a4a
																			Apba3						Tatdn2
																			Olfr360						Ctrc
																			Gjc2						Pcyox1l
																			Axl						4930579G24Rik
																			Bmerb1						Lrfn5
																			Odad2						Zp1
																			Pramex1						1500009L16Rik
																			Osbpl5						Oga
																			Rnf4						Ap4e1
																			Otud3						Lcn4
																			Hmg20b						Il21
																			Pank2						Ldlrad1
																			Jph3						H2ac18
																			Glra2						Snapin
																			Hexdc						Stard3
																			Zscan2						Plekhj1
																			Esr1						Ufm1
																			Rspo4						Cyp7a1
																			Slc12a8						Prl7d1
																			Shoc2						Pfdn1
																			Adad2						Ubqln4
																			Hdhd2						Taf7l2
																			Rad54b						Sirt6
																			Cyyr1						Atp6v1c1
																			Noct						Gla
																			Ipcef1						Inka1
																			Ablim2						Gsdma
																			Arc						Trmt9b
																			Klra1						Pla2g1b
																			Mob3c						Arl3
																			Adra1a						Kbtbd7
																			Msh4						Lrig2
																			Gpr183						Cutc
																			Ugt2b35						Myl3
																			Clcn6						Terf1
																			Odf2						Morf4l2
																			Ssr3						A3galt2
																			Cdkn1b						Kcnmb2
																			Crabp2						Ints1
																			Coa7						Proca1
																			Fgf6						Mphosph6
																			Scgb1b3						Tvp23a
																			Samd4b						Scn7a
																			Tg						BC034090
																			Creld2						Evi2a
																			Bicra						Galnt6
																			Trpc4						Fam76b
																			Rnf8						Vdac1
																			Slc22a3						Rhno1
																			Slfn4						Strit1
																			Rhoq						Nsun3
																			Kctd18						Klhl35
																			Aste1						Mst1r
																			Itga7						Panx2
																			Akain1						Il23a
																			Rad23b						Cryab
																			Mrgprb13						Akr1c20
																			Uxt						Mroh2a
																			Ltb						Ccdc83
																			Srp14						Prtg
																			Ptcra						Inafm2
																			Olfr517						Arfgef2
																			Lce1b						Lrrc8b
																			Plpp3						Scgb1b27
																			Ank3						Ppp1r16b
																			Retreg1						Ndst2
																			Efcab11						Ptprd
																			Ccdc84						Omt2a
																			Tafa3						Jph2
																			Sit1						Lrrn2
																			Olfr1461						Notch2
																			Clstn1						Kcng2
																			Gm4981						Kctd12
																			Olfr66						Sox2
																			Pcdhgc5						Rnf126
																			Pcsk7						Spint5
																			Kdm1a						Insc
																			Myh13						Potegl
																			Susd2						Olfr168
																			Gm40755						Fzd10
																			Plekha5						Btaf1
																			Renbp						Sv2c
																			Adprhl1						Sclt1
																			Dram2						Mab21l4
																			Septin11						Mink1
																			Vangl2						Tex14
																			Tubb4a						Cops7a
																			Tmem265						Dact2
																			Olfr152						Olfr198
																			Abcg5						Ptchd4
																			Vmo1						Stim2
																			Krt36						Olfr1418
																			Gm21783						Fbxl2
																			Rbm48						Letmd1
																			Bbip1						Olfr45
																			4930402F06Rik						Nps
																			4930519G04Rik						Samd11
																			Smok2b						Ces1c
																			Rab28						Csn1s1
																			Zc2hc1b						Cyth2
																			Mideas						Bcl3
																			Kif5a						Ston2
																			Sart3						Olfr1044
																			Spink1						Olfr1100
																			Cpeb3						Apbb2
																			Clcn1						Hs3st2
																			Rgs12						Apba3
																			Slc13a2						Olfr360
																			Myoz1						Gjc2
																			Map3k11						Axl
																			Gata6						Bmerb1
																			Gm13102						Odad2
																			Fpr-rs3						Pramex1
																			Cdkn2d						Osbpl5
																			Slc8a3						Rnf4
																			Mpl						Otud3
																			Sapcd2						Hmg20b
																			Ccdc182						Pank2
																			Cenpn						Jph3
																			Klra20						Glra2
																			2310061N02Rik						Hexdc
																			Hcfc1r1						Zscan2
																			Ribc2						Esr1
																			Zup1						Rspo4
																			Zfp27						Slc12a8
																			Septin8						Shoc2
																			Gpr135						Adad2
																			0610009B22Rik						Hdhd2
																			Olfr1348						Rad54b
																			Xkr5						Cyyr1
																			Crk						Noct
																			Gjd4						Ipcef1
																			Cyp2c50						Ablim2
																			Ryr3						Arc
																			Hmgn2						Klra1
																			Tex13a						Mob3c
																			Dcxr						Adra1a
																			Wdr20rt						Msh4
																			Prn						Gpr183
																			Csnk2a2						Ugt2b35
																			Ccdc130						Clcn6
																			Serpinb8						Odf2
																			Sfrp5						Ssr3
																			Trmu						Cdkn1b
																			Tcof1						Crabp2
																			Josd1						Coa7
																			Oas1g						Fgf6
																			Huwe1						Scgb1b3
																			Erlec1						Samd4b
																			Dynlt4						Tg
																			Actr1b						Creld2
																			Ndufaf4						Bicra
																			Olfr397						Trpc4
																			Col28a1						Rnf8
																			Olfr1233						Slc22a3
																			Pknox1						Slfn4
																			Apela						Rhoq
																			Asrgl1						Kctd18
																			Tcf23						Aste1
																			Actn4						Itga7
																			Mmp28						Akain1
																			Slc25a13						Rad23b
																			Rsbn1						Mrgprb13
																			Alppl2						Uxt
																			Cul1						Ltb
																			Grik4						Srp14
																			Olfr690						Ptcra
																			Mkrn3						Olfr517
																			D630023F18Rik						Lce1b
																			Olfr402						Plpp3
																			Cwc22						Ank3
																			Hoxa6						Retreg1
																			Stam						Efcab11
																			Apob						Ccdc84
																			Chrdl2						Tafa3
																			Srsf5						Sit1
																			Olfr1509						Olfr1461
																			Cryz						Clstn1
																			Ankib1						Gm4981
																			Dclre1c						Olfr66
																			Pgd						Pcdhgc5
																			Stx7						Pcsk7
																			Rundc1						Kdm1a
																			Ep300						Myh13
																			Gm15056						Susd2
																			Slc9a6						Gm40755
																			Kcnj1						Plekha5
																			Krtap20-2						Renbp
																			Stpg2						Adprhl1
																			Gm5142						Dram2
																			Dis3l						Septin11
																			Fgd1						Vangl2
																			Htra3						Tubb4a
																			H2ac1						Tmem265
																			Trim15						Olfr152
																			Dlx4						Abcg5
																			Olfr1105						Vmo1
																			Atad2b						Krt36
																			Zfp36						Gm21783
																			Rcbtb1						Rbm48
																			Smyd5						Bbip1
																			Ppp6r3						4930402F06Rik
																			Abca3						4930519G04Rik
																			Treml4						Smok2b
																			Rnps1						Rab28
																			Kcnip2						Zc2hc1b
																			Oser1						Mideas
																			Ctag2l1						Kif5a
																			Olfr578						Sart3
																			Ercc2						Spink1
																			Glyr1						Cpeb3
																			Gypc						Clcn1
																			Gjd3						Rgs12
																			D1Pas1						Slc13a2
																			Mrgprx1						Myoz1
																			Kctd21						Map3k11
																			Babam1						Gata6
																			Tmem81						Gm13102
																			Adam15						Fpr-rs3
																			Olfr729						Cdkn2d
																			Nppa						Slc8a3
																			Ap3b1						Mpl
																			Tcf7l1						Sapcd2
																			Pcmt1						Ccdc182
																			Ccdc88c						Cenpn
																			Plxnb1						Klra20
																			Agtrap						2310061N02Rik
																			Ppid						Hcfc1r1
																			Olfr1364						Ribc2
																			Tenm1						Zup1
																			Mterf3						Zfp27
																			Vopp1						Septin8
																			Tnrc6a						Gpr135
																			Hs3st5						0610009B22Rik
																			Slc10a5						Olfr1348
																			Triap1						Xkr5
																			Ttc26						Crk
																			Terf2ip						Gjd4
																			Larp4b						Cyp2c50
																			Cd99						Ryr3
																			Gm15737						Hmgn2
																			Phf14						Tex13a
																			Gpx5						Dcxr
																			Cmtm5						Wdr20rt
																			LOC118567918						Prn
																			Actl10						Csnk2a2
																			Cks1b						Ccdc130
																			Itpkb						Serpinb8
																			Olfr530						Sfrp5
																			Adamts3						Trmu
																			Zfp503						Tcof1
																			Zbed3						Josd1
																			Dkk2						Oas1g
																			P3r3urf						Huwe1
																			Zdhhc21						Erlec1
																			Isl1						Dynlt4
																			Tmem170b						Actr1b
																			Ina						Ndufaf4
																			Dsg2						Olfr397
																			Chrna9						Col28a1
																			Impact						Olfr1233
																			Nbdy						Pknox1
																			Klhl34						Apela
																			Cox7a2						Asrgl1
[truncated: 17,966 more rows]
