# Supplementary figures and images for: Lipid Peroxidation and Type I Interferon Coupling Fuels Pathogenic Macrophage Activation Causing Tuberculosis Susceptibility
Source: eLife journal article supplement (doi:10.7554/elife.106814), 2025-08-29

Figure 2-figure supplement 1 A:  $\beta$ -TrCP

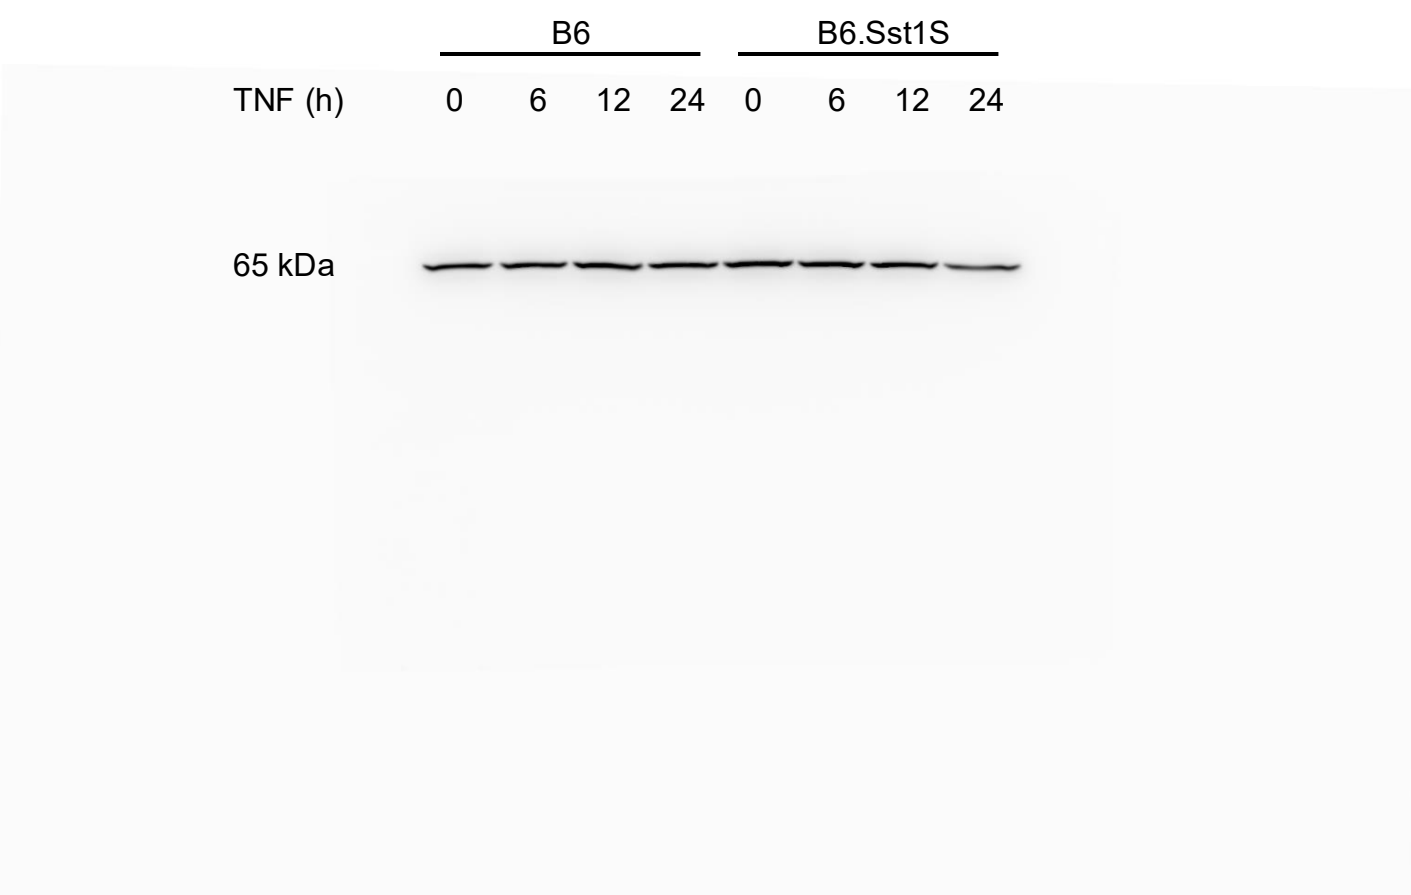

Figure 2-figure supplement 1 A: Keap1

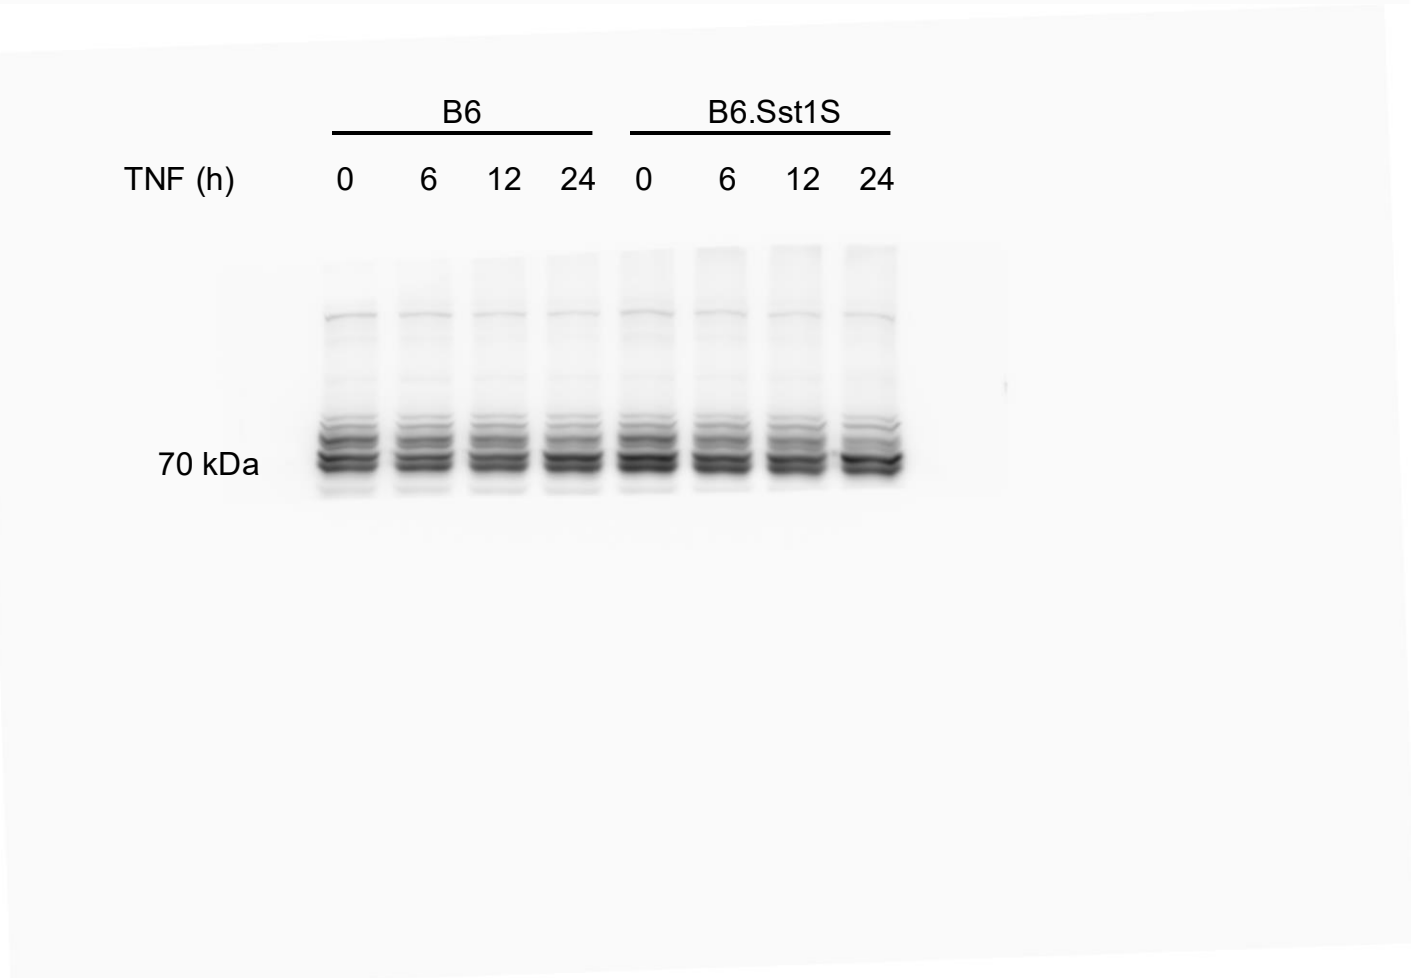

Supplement: fig2-figsupp1-data1 [file elife-106814-fig2-figsupp1-data1-v1.zip]

Figure 4A: Nrf2

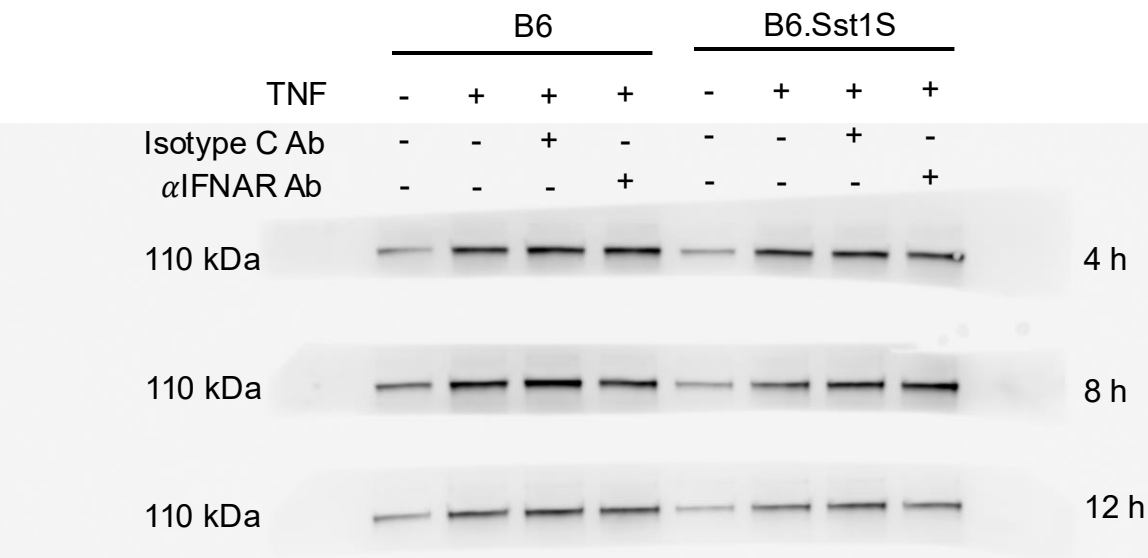

Figure 4A:  $\beta$ -tubulin

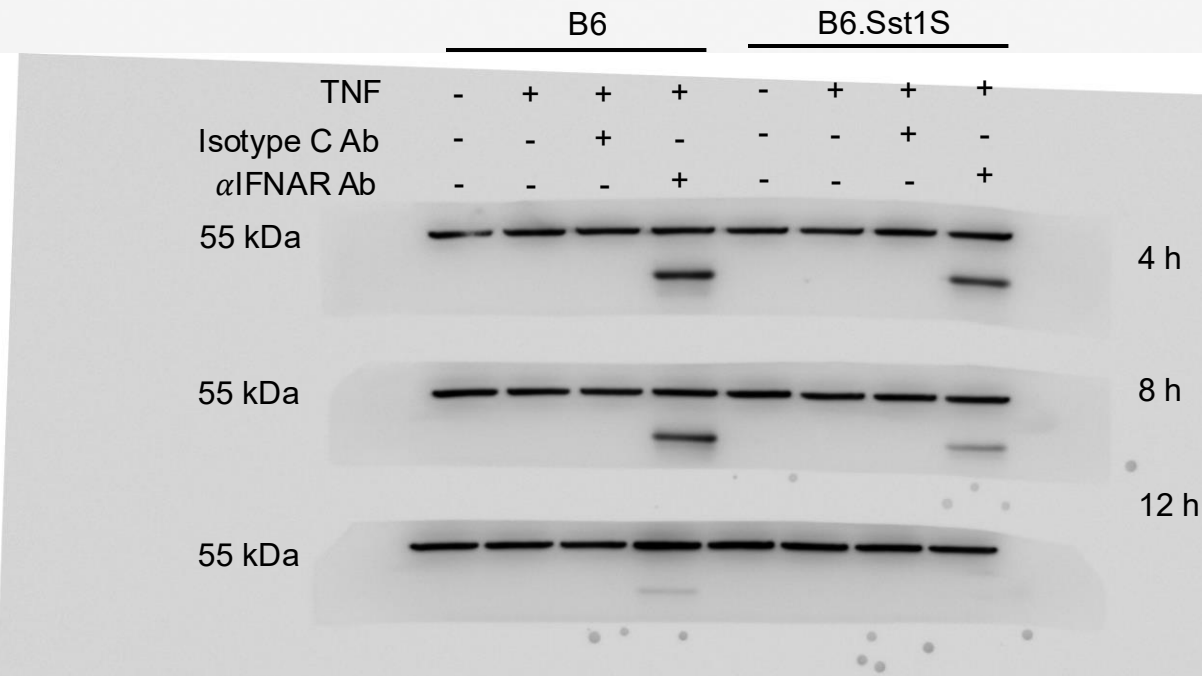

Figure 4B: Ftl

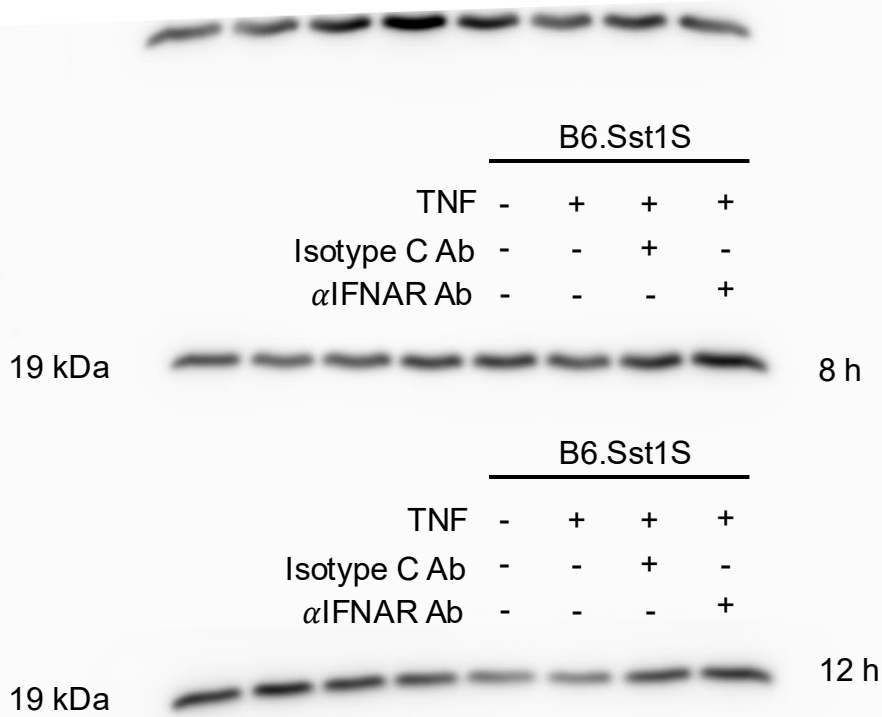

Figure 4B: β-tubulin

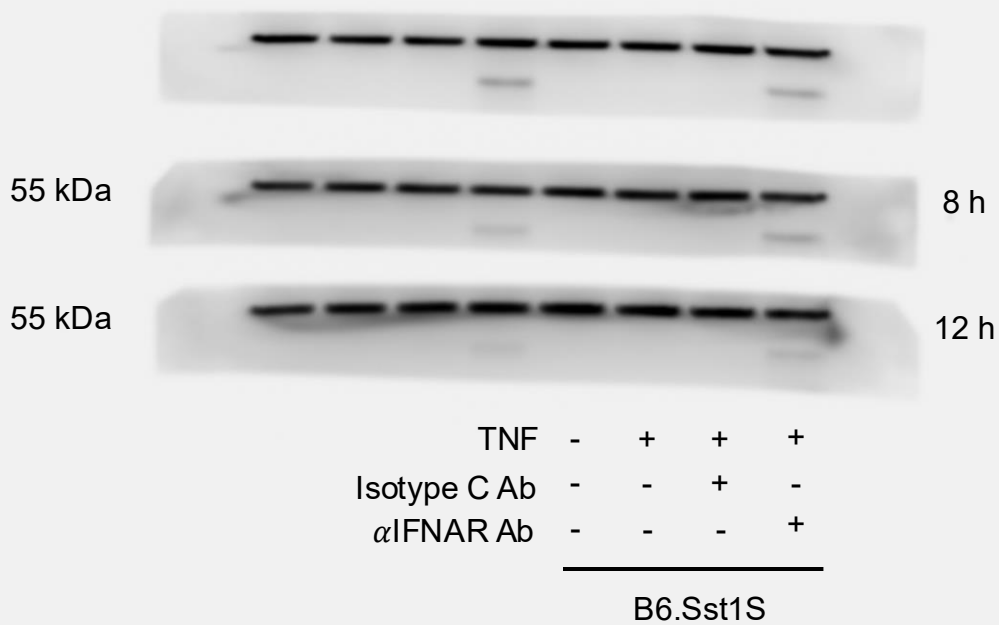

Supplement: fig4-data1 [file elife-106814-fig4-data1-v1.zip]
